# Supplementary material for: Electrocatalytic synthesis of α,α-gem-dihalide ketones from α-mono-halide ketones and unexpected dimer condensation
Source: Royal Society of Chemistry journal article supplement (doi:10.1039/d1gc04584a), 2022-01-01
Supplement: d1gc04584a1.pdf [file d1gc04584a1.pdf]

*Electronic Supplementary Information*

**Electrocatalytic synthesis of  $\alpha,\alpha$ -gem-dihalide ketones from  
 $\alpha$ -mono-halide ketones and unexpected dimer condensation**

Bei Zhou,<sup>ac</sup> Yu-Juan He,<sup>a</sup> Yun-Feng Tao,<sup>a</sup> Lan-Xiang Liu,<sup>c</sup> Min Hu,<sup>ac</sup> Zu-Hui Chang,<sup>a</sup>  
Hong Lei,<sup>a</sup> Jun Lin,<sup>\*c</sup> Tong Lin<sup>\*b</sup> and Guan-Ben Du<sup>\*a</sup>

\* Corresponding authors: Prof. Jun Lin: linjun@ynu.edu.cn,  
Prof. Tong Lin: tong.lin@tiangong.edu.cn, Prof. Guan-Ben Du: guanben@swfu.edu.cn

*a. Key Laboratory of Forest Resources Conservation and Utilisation in the Southwest Mountains of China, Ministry of Education, International Joint-Research Center for Bio-Materials, Ministry of Science and Technology, Yunnan Province Key Lab of Wood Adhesives and Glued Products, College of Life Science, Southwest Forestry University, Kunming 650224, P. R. China.*

*b. State Key Laboratory of Separation Membranes and Membrane Processes, School of Textile Science and Engineering, Tiangong University, Tianjin 300387, P. R. China.*

*c. Key Laboratory of Medicinal Chemistry for Natural Resources, Ministry of Education, School of Chemical Science and Technology, Yunnan University, Kunming 650091, P. R. China.*

## CONTENTS

|                                                                                                                        |    |
|------------------------------------------------------------------------------------------------------------------------|----|
| <b>1. General experiment</b> .....                                                                                     | 1  |
| <b>1.1 Experimental details</b> .....                                                                                  | 1  |
| <b>1.2 Characterizations</b> .....                                                                                     | 1  |
| <b>1.3 Electrocatalysis apparatus</b> .....                                                                            | 2  |
| <b>1.4 Bio-active <math>\alpha, \alpha</math>-gem-dihalide natural products</b> .....                                  | 3  |
| <b>2. Reaction conditions optimization</b> .....                                                                       | 4  |
| <b>3. General electrocatalysis reactions</b> .....                                                                     | 5  |
| <b>3.1 Typical electro-halogenation</b> .....                                                                          | 5  |
| <b>3.2 Gram-scale electro-halogenation</b> .....                                                                       | 6  |
| <b>3.3 Electrocatalytic dimer condensation</b> .....                                                                   | 7  |
| <b>3.4 X-ray of the dimer condensation product</b> .....                                                               | 8  |
| <b>3.5 Control experiments</b> .....                                                                                   | 10 |
| <b>3.5.1 GC-MS for electrocatalytic halogenation</b> .....                                                             | 10 |
| <b>3.5.2 GC-MS for electrocatalytic dimer condensation</b> .....                                                       | 12 |
| <b>3.5.3 NaOH addition experiment without electricity</b> .....                                                        | 16 |
| <b>3.5.4 NBS experiment</b> .....                                                                                      | 17 |
| <b>3.5.5 NaI experiment</b> .....                                                                                      | 18 |
| <b>3.5.6 1,2-dione experiment</b> .....                                                                                | 23 |
| <b>3.5.7 <math>\alpha</math>-keto ester experiment</b> .....                                                           | 29 |
| <b>3.5.8 NaCl, TBAC (without electricity) experiment</b> .....                                                         | 31 |
| <b>3.6 Radical inhibition experiment</b> .....                                                                         | 32 |
| <b>3.7 EPR experiments</b> .....                                                                                       | 33 |
| <b>3.8 Microcoulometric experiments</b> .....                                                                          | 35 |
| <b>3.9 Cyclic voltammetry experiments</b> .....                                                                        | 41 |
| <b>3.10 GC-MS experiment for electro-fluorination</b> .....                                                            | 44 |
| <b>4. <math>^1\text{H}</math>-NMR <math>^{13}\text{C}</math>-NMR, and <math>^{19}\text{F}</math>-NMR spectra</b> ..... | 45 |
| <b>5. DFT calculations</b> .....                                                                                       | 84 |

# 1. General experiment

## 1.1 Experimental details

Electro-catalysis experiments were performed in an argon atmosphere. Chemical reagents were obtained from commercial suppliers (Sigma-Aldrich, Adamas, Shanghai Titan Technology Co., LTD, et al.) and used without further purification. Purified water was purchased from the local market. Reactions were monitored by thin-layer chromatography (TLC) on 0.25 mm silica gel GF254 plate (Merck Silica gel 60-F254) using UV light as a visualizing agent and an ethanolic solution of phosphomolybdic acid and cerium sulfate and heat as a developing agent. Silica gel (300-400 mesh) was used for flash column chromatography. Yields refer to chromatographically and spectroscopically homogeneous materials unless otherwise noted. Switching DC voltage regulator for electrolysis is a triple display potentiostat (KORAD-KA3305D, made in China). The anodic electrode was carbon plate (10 mm×10 mm×2 mm), and the cathodic electrode was platinum plate (10 mm×10 mm×0.2 mm).

## 1.2 Characterizations

$^1\text{H-NMR}$ ,  $^{13}\text{C-NMR}$ , and  $^{19}\text{F-NMR}$  were recorded with Bruker Advance (300, 400, 500 & 600 MHz) spectrometers. All chemical shifts were reported as  $\delta$  values in parts per million (ppm) and coupling constants ( $J$ ) in Hz. Tetramethylsilane (TMS) was used as the internal standard for  $\text{CDCl}_3$  (7.26 ppm for  $^1\text{H}$ , 77.00 ppm for  $^{13}\text{C}$ ), respectively.

**IR** spectra were recorded on a Bruker Bio-Rad FTS-135 spectrometer with KBr pellets.

**Mass spectra:** (1) **HR-MS (ESI)** was taken on AB QSTAR Pulsar mass spectrometer or Agilent LC/MSD TOF mass spectrometer. HR-MS data were recorded via electron impact mass spectrometry using a time-of-flight analyzer. (2) **GC-MS** was performed on a Hewlett-Packard 6890 N gas chromatograph (equipped with the same HP-5MS capillary column) under identical operating conditions used in Mass Spectral Library by R. P. Adams (Adams, 2007).

**Electrochemistry (CVs):** cyclic voltammograms were obtained on a Metrohm PGSTAT302N potentiostat.

### 1.3 Electrocatalysis apparatus

Switching DC voltage regulator for electrolysis is a triple display potentiostat (KORAD-KA3305D, made in China). In an oven-dried undivided two-necked (or three-necked) flask (50 mL) equipped with a stir bar. The flask was equipped with a platinum plate (10 mm×10 mm×0.2 mm) as the cathodic electrode and a carbon plate (10 mm×10 mm×2 mm) as the anodic electrode. The reaction was in an argon atmosphere. The reaction was conducted at room temperature.

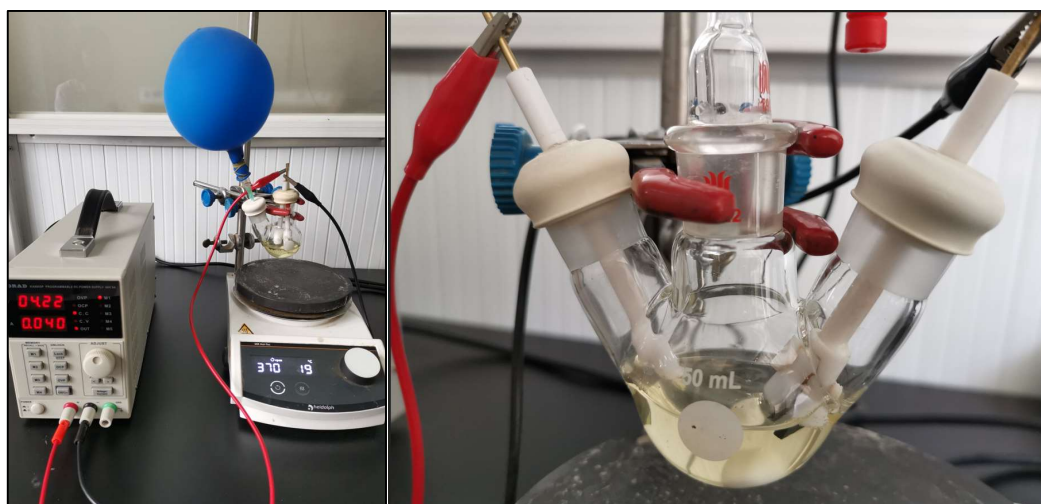

*Figure S1.* Electrochemical reaction cell apparatus and electrodes



## 1.4 Bio-active $\alpha,\alpha$ -gem-dihalide natural products

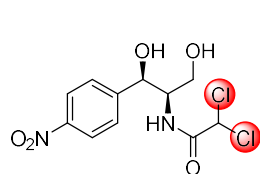

**Chloramphenicol**  
antibacterial activity

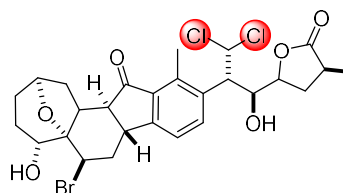

**Nakiterpiosin**  
anticancer activity

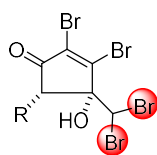

**Mahorone** (R=H)  
**5-Bromomahorone** (R=Br)  
antibacterial activity

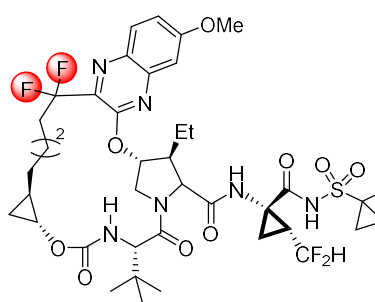

**Voxilaprevir**  
protease inhibitor for Hepatitis C

**Scheme S1.**  $\alpha,\alpha$ -Gem-dihalide monoterpenes among marine bio-active natural products.

## 2. Reaction conditions optimization

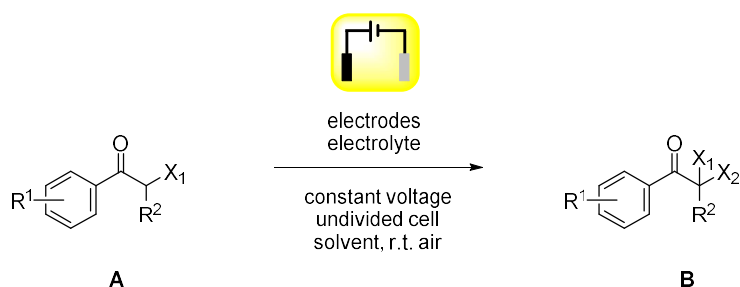

| Entry | Variations of standard conditions                                                                              | Yield (%) <sup>a</sup> |
|-------|----------------------------------------------------------------------------------------------------------------|------------------------|
| 1     | none                                                                                                           | 82                     |
| 2     | no CH <sub>3</sub> CN                                                                                          | 13                     |
| 3     | toluene, THF, or dioxane<br>replace CH <sub>3</sub> CN                                                         | 13-25                  |
| 4     | H <sub>2</sub> O (0.5 or 2.0 mol·L <sup>-1</sup> )                                                             | 35-35                  |
| 5     | no DMC                                                                                                         | 57                     |
| 6     | without TBAC                                                                                                   | 37                     |
| 7     | <sup>n</sup> Bu <sub>4</sub> NBF <sub>4</sub> or <sup>n</sup> Bu <sub>4</sub> NPF <sub>6</sub><br>replace TBAC | 35-38                  |
| 8     | TBAF                                                                                                           | 16                     |
| 9     | Nickel as cathode                                                                                              | 18                     |
| 10    | 5 mA or 100 mA current                                                                                         | 12-35                  |
| 11    | Ar or O <sub>2</sub> atmosphere                                                                                | 81-80                  |
| 12    | 6h reaction time                                                                                               | 20                     |
| 13    | without electric current                                                                                       | 0                      |
| 14    | K <sub>2</sub> CO <sub>3</sub> (0.2 mol·L <sup>-1</sup> )                                                      | 12                     |
| 15    | AcOH (0.2 mol·L <sup>-1</sup> )                                                                                | 11                     |
| 16    | NaOH (1.0 mol·L <sup>-1</sup> )                                                                                | dimer <sup>b</sup>     |

**Table S1.** Typical electro halogenation. Standard reaction conditions: glassy carbon plate (10 mm × 10 mm × 2 mm) as anode, Pt plate (10 mm × 10 mm × 0.2 mm) as cathode, constant current = 40 mA, reactant **A** (200 mg, 1.0 mmol), TBAC (55.6 mg, 0.2 mmol), NaCl (725 mg, 1.0 mol·L<sup>-1</sup>), CH<sub>3</sub>CN (5.0 mL), H<sub>2</sub>O (5.0 mL), DMC (2.5 mL), room temperature, ambient atmosphere, 30 min, undivided cell. <sup>a</sup> Isolated yield by silica gel column chromatography, the same for other yields. <sup>b</sup> A dimer condensation product.

### 3. General electrocatalysis reactions

#### 3.1 Typical electro-halogenation

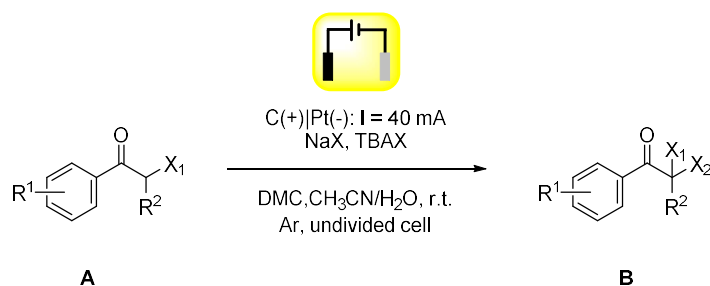

**Scheme S2.** Electrocatalytic halogenation

In an oven-dried undivided two-necked flask (50 mL) equipped with a stir bar, 2-halide acetophenone (200 mg, 1.0 mmol), tetrabutylammonium halides (TBAC or TBAB, 50 mg, 0.2 mmol), brine (e.g., NaCl, KCl, NaBr, KBr, or NaF, 1.0 mol·L<sup>-1</sup>, 6.5 mmol), CH<sub>3</sub>CN (5.0 mL), H<sub>2</sub>O (5.0 mL), and DMC (2.5 mL) were added. The flask was equipped with a platinum plate (10 mm × 10 mm × 0.2 mm) as the cathode and a carbon plate (10 mm × 10 mm × 2 mm) as the anode. The reaction was conducted under an ambient atmosphere. The reaction mixture was stirred and electrolyzed at a constant current of 40 mA at room temperature for 30 min. The reaction was monitored by TLC, using UV light as a visualizing agent and an ethanolic solution of phosphomolybdic acid and cerium sulfate and heat as a developing agent. When the material no longer decreased, the solution was extracted with ethyl acetate (EtOAc) (3 × 10 mL) and H<sub>2</sub>O (3 × 10 mL). The combined organic layer was dried with Na<sub>2</sub>SO<sub>4</sub> and filtered. The solvent was removed with a rotary evaporator. The pure product was obtained by flash chromatography on silica gel using EtOAc and petroleum ether as the eluent. The products were further identified by FTIR spectroscopy, NMR spectroscopy, and HRMS analysis.

### 3.2 Gram-scale electro-halogenation

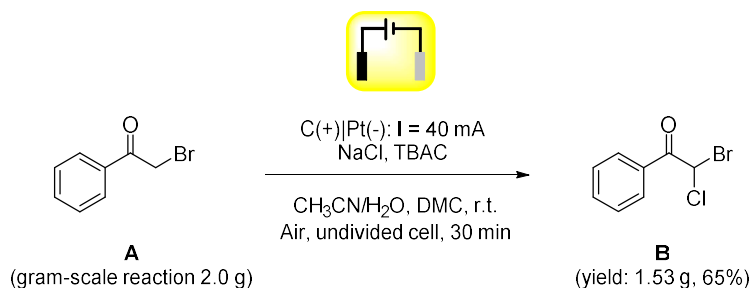

**Scheme S3.** Gram-scale electro-halogenation

In an oven-dried undivided two-necked flask (250 mL) equipped with a stir bar, 2-bromoacetophenone (2.0 g, 1.0 mmol), TBAC (564.3 mg, 0.2 mmol), NaCl (3.8 g, 6.5 mmol), CH<sub>3</sub>CN (50.0 mL), H<sub>2</sub>O (50.0 mL), and DMC (25.0 mL) were combined and added. The flask was equipped with a platinum plate (10 mm × 10 mm × 0.2 mm) as the cathode and a carbon plate (10 mm × 10 mm × 2 mm) as the anode. The reaction was conducted under an ambient atmosphere. The reaction mixture was stirred and electrolyzed at a constant current of 40 mA at room temperature for 30 min. The reaction was monitored by TLC, using UV light as a visualizing agent and an ethanolic solution of phosphomolybdic acid and cerium sulfate and heat as a developing agent. When the material no longer decreased, the solution was extracted with ethyl acetate (EtOAc) (3 × 10 mL) and H<sub>2</sub>O (3 × 10 mL). The combined organic layer was dried with Na<sub>2</sub>SO<sub>4</sub> and filtered. The solvent was removed with a rotary evaporator. The pure product was obtained by flash chromatography on silica gel using EtOAc and petroleum ether as the eluent. Product  $\alpha$ -bromo- $\alpha$ -chloroacetophenone was obtained with a yield of 1.53 g, 65%.

### 3.3 Electrocatalytic dimer condensation

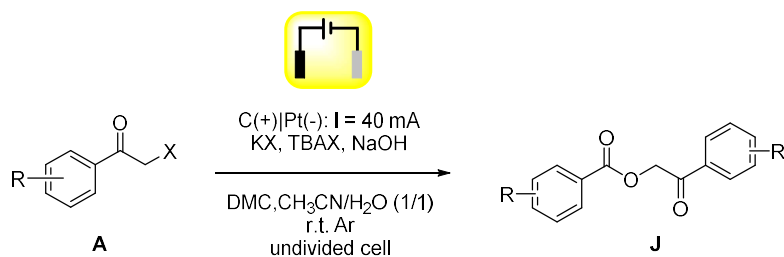

**Scheme S4.** Electrocatalysis for dimer condensation

In an oven-dried undivided two-necked flask (50 mL) equipped with a stir bar, 2-halo-acetophenone (200 mg, 1.0 mmol), tetrabutylammonium halide (TBAC or TBAB, ~ 50 mg, 0.2 mmol), brine (e.g., NaCl, KCl, NaBr, KBr, or NaF, 1.0 mol·L<sup>-1</sup>, 6.5 mmol), CH<sub>3</sub>CN (5.0 mL), H<sub>2</sub>O (5.0 mL), and DMC (2.5 mL) were added. NaOH (500 mg, 1.0 mol·L<sup>-1</sup>) was added to the reaction solutions. The flask was equipped with a platinum plate (10 mm × 10 mm × 0.2 mm) as the cathode and a carbon plate (10 mm × 10 mm × 2.0 mm) as the anode. The reaction was conducted under an ambient atmosphere. The reaction mixture was stirred and electrolyzed at a constant current of 40 mA at room temperature for 30 min. The reaction was monitored by TLC, using UV light as visualizing agent and an ethanolic solution of phosphomolybdic acid and cerium sulfate and heat as a developing agent. When the material no longer decreased, the solution was extracted with EtOAc (3 × 10 mL) and H<sub>2</sub>O (3 × 10 mL). The combined organic layer was dried with Na<sub>2</sub>SO<sub>4</sub> and filtered. The solvent was removed with a rotary evaporator. The pure product was obtained by flash chromatography on silica gel using EtOAc and petroleum ether as the eluent. The products were further identified by FTIR spectroscopy, NMR spectroscopy, and HRMS analysis.

### 3.4 X-ray of the dimer condensation product

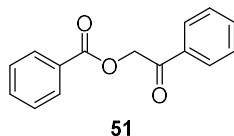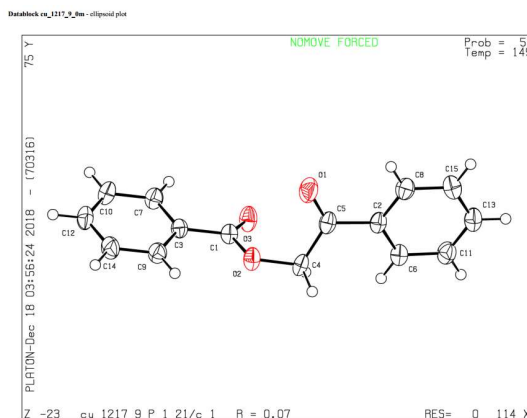

**Figure S2.** X-ray of dime condensation product **51** (CCDC No. 2106444)

Table 1. Crystal data and structure refinement for C: \_1217\_9.

|                                 |                                    |                             |
|---------------------------------|------------------------------------|-----------------------------|
| Identification code             | cu_1217_9_0m                       |                             |
| Empirical formula               | C15 H12 O3                         |                             |
| Formula weight                  | 240.25                             |                             |
| Temperature                     | 149.44 K                           |                             |
| Wavelength                      | 1.54178 Å                          |                             |
| Crystal system                  | Monoclinic                         |                             |
| Space group                     | P 1 21/c 1                         |                             |
| Unit cell dimensions            | a = 8.9535(3) Å                    | $\alpha = 90^\circ$ .       |
|                                 | b = 14.0575(5) Å                   | $\beta = 90.799(2)^\circ$ . |
|                                 | c = 9.4542(3) Å                    | $\gamma = 90^\circ$ .       |
| Volume                          | 1189.83(7) Å <sup>3</sup>          |                             |
| Z                               | 4                                  |                             |
| Density (calculated)            | 1.341 Mg/m <sup>3</sup>            |                             |
| Absorption coefficient          | 0.763 mm <sup>-1</sup>             |                             |
| F(000)                          | 504                                |                             |
| Crystal size                    | ? x ? x ? mm <sup>3</sup>          |                             |
| Theta range for data collection | 4.940 to 72.084°.                  |                             |
| Index ranges                    | -11<=h<=11, -17<=k<=16, -11<=l<=11 |                             |
| Reflections collected           | 19949                              |                             |
| Independent reflections         | 2335 [R(int) = 0.1052]             |                             |
| Completeness to theta = 67.679° | 99.8 %                             |                             |

|                                   |                                             |
|-----------------------------------|---------------------------------------------|
| Absorption correction             | Semi-empirical from equivalents             |
| Max. and min. transmission        | 0.7538 and 0.3884                           |
| Refinement method                 | Full-matrix least-squares on F <sup>2</sup> |
| Data / restraints / parameters    | 2335 / 0 / 164                              |
| Goodness-of-fit on F <sup>2</sup> | 1.097                                       |
| Final R indices [I>2sigma(I)]     | R1 = 0.0669, wR2 = 0.1616                   |
| R indices (all data)              | R1 = 0.0826, wR2 = 0.1745                   |
| Extinction coefficient            | 0.0119(18)                                  |
| Largest diff. peak and hole       | 0.316 and -0.333 e.Å <sup>-3</sup>          |

Table 2. Atomic coordinates ( $\times 10^4$ ) and equivalent isotropic displacement parameters ( $\text{\AA}^2 \times 10^3$ ) for C: \_1217\_9. U(eq) is defined as one-third of the trace of the orthogonalized U<sup>ij</sup> tensor.

|       | x       | y       | z       | U(eq) |
|-------|---------|---------|---------|-------|
| O(1)  | 8939(2) | 4904(1) | 7079(2) | 48(1) |
| O(2)  | 7566(2) | 3929(1) | 5032(2) | 35(1) |
| O(3)  | 5606(2) | 4143(1) | 6457(2) | 38(1) |
| C(1)  | 6470(2) | 3614(2) | 5884(2) | 27(1) |
| C(2)  | 8489(2) | 6454(2) | 6204(2) | 28(1) |
| C(3)  | 6425(2) | 2564(2) | 6000(2) | 27(1) |
| C(4)  | 7644(2) | 4951(2) | 4893(2) | 31(1) |
| C(5)  | 8393(2) | 5399(2) | 6151(2) | 31(1) |
| C(6)  | 7624(2) | 7036(2) | 5318(2) | 32(1) |
| C(7)  | 5478(2) | 2164(2) | 6991(2) | 32(1) |
| C(8)  | 9473(2) | 6866(2) | 7176(2) | 35(1) |
| C(9)  | 7266(3) | 1976(2) | 5133(2) | 34(1) |
| C(10) | 5376(3) | 1183(2) | 7111(3) | 37(1) |
| C(11) | 7748(3) | 8020(2) | 5424(3) | 38(1) |
| C(12) | 6198(3) | 602(2)  | 6236(3) | 37(1) |
| C(13) | 8745(3) | 8423(2) | 6382(3) | 37(1) |
| C(14) | 7147(3) | 996(2)  | 5247(3) | 38(1) |
| C(15) | 9599(3) | 7845(2) | 7265(3) | 37(1) |

### 3.5 Control experiments

GC-MS analysis of menthyl and isomenthyl acetates was also performed on a Hewlett-Packard 6890 N gas chromatograph (equipped with the same HP-5MS capillary column) under identical operating conditions used in Mass Spectral Library by R. P. Adams (Adams, 2007). In this experiment, the GC was operated under the following conditions: injector and interface temperatures were 220 and 240 °C, respectively; oven temperature was raised from 60 °C to 246 °C at a heating rate of 3 °C/min; the flow of helium carrier gas was 1.0 mL/min.

#### 3.5.1 GC-MS for electrocatalytic halogenation

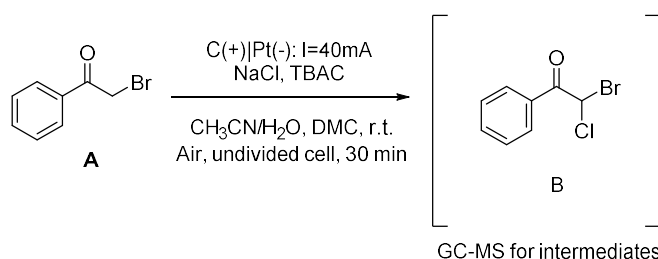

**Scheme S5.** Electrocatalysis for halogenation

In an oven-dried undivided two-necked flask (250 mL) equipped with a stir bar, 2-bromoacetophenone (200 mg, 1.0 mmol), TBAC (56.4 mg, 0.2 mmol), NaCl (380 mg, 6.5 mmol), CH<sub>3</sub>CN (5.0 mL), H<sub>2</sub>O (5.0 mL), and DMC (2.5 mL) were combined and added. The flask was equipped with a platinum plate (50 mm×50 mm×0.2 mm) as the cathodic electrode and a carbon plate (50 mm×50 mm×2 mm) as the anodic electrode. The reaction was in an ambient atmosphere. The reaction mixture was stirred and electrolyzed at a constant current of 40 mA under room temperature for 30 min.

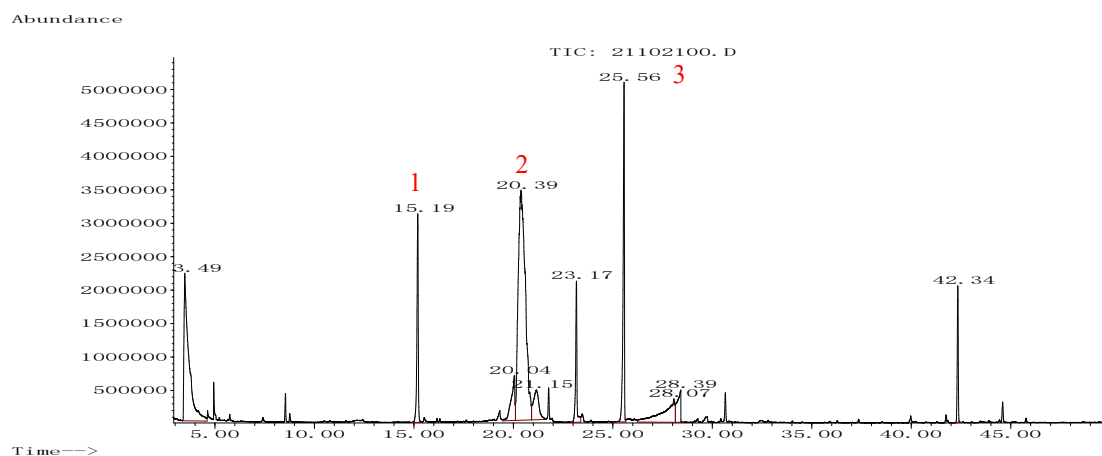



1

Abundance

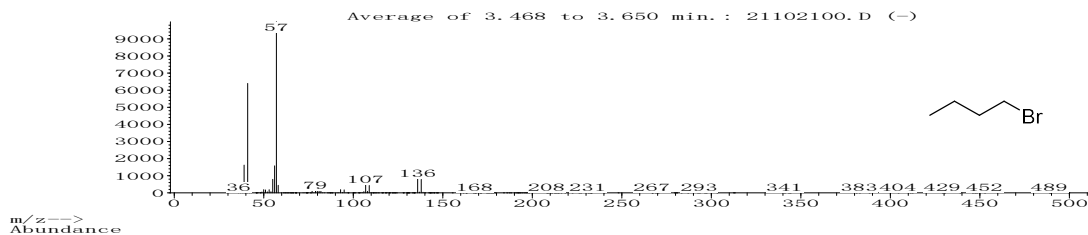

Abundance

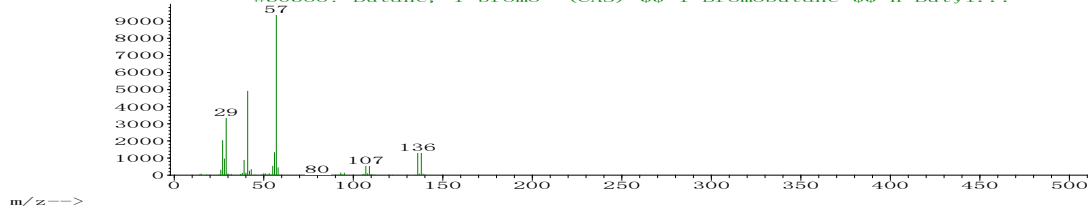

2

Abundance

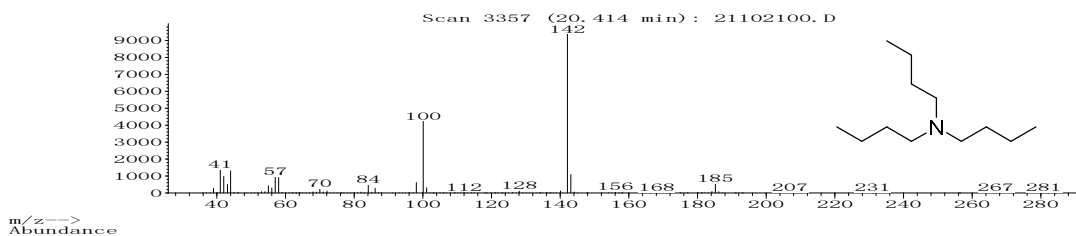

Abundance

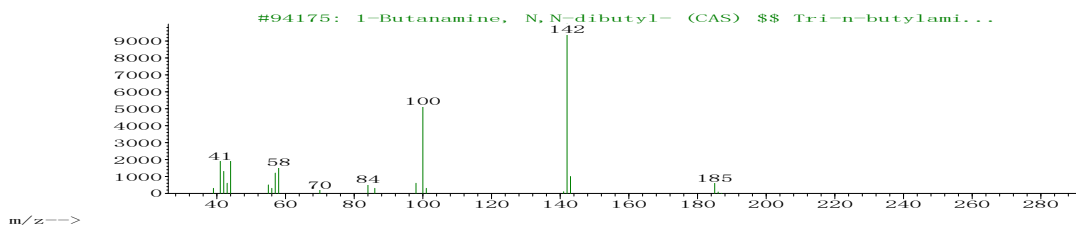

3

Abundance

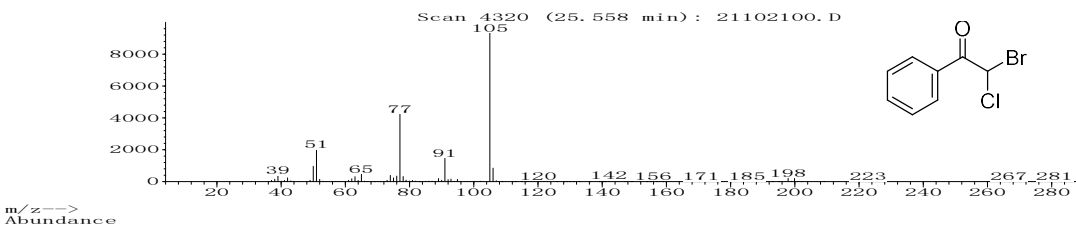

Abundance

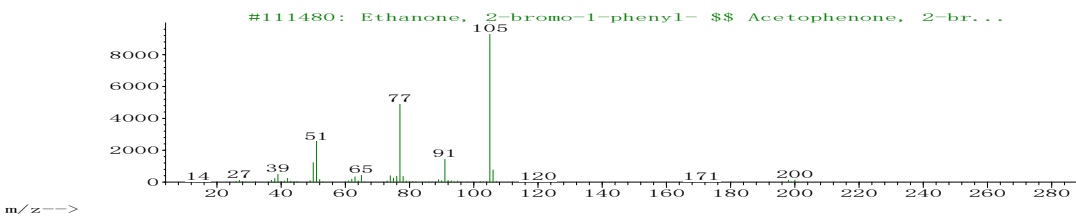

### 3.5.2 GC-MS for electrocatalytic dimer condensation

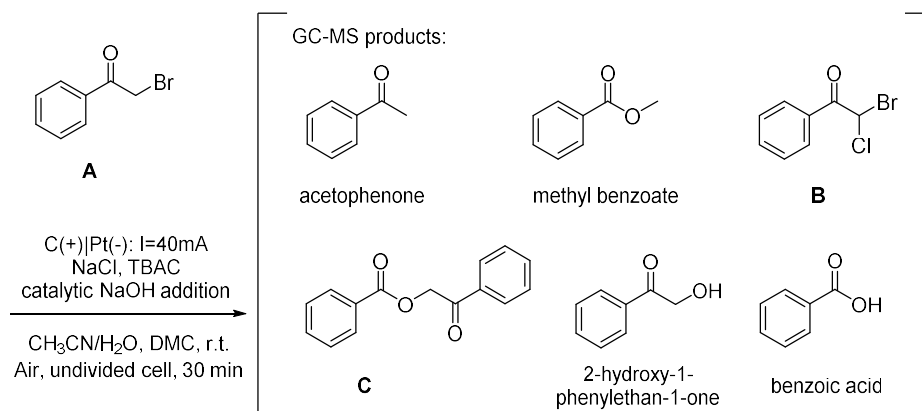

**Scheme S6.** Electrocatalysis for dimer condensation

In an oven-dried undivided two-necked flask (50 mL) equipped with a stir bar, 2-halo-acetophenone (~ 200 mg, 1.0 mmol), tetrabutylammonium halide (TBAC or TBAB, ~ 50 mg, 0.2 mmol), brine (eg: NaCl, KBr, NaF, 1.0 mol·L<sup>-1</sup>, 6.5 mmol), CH<sub>3</sub>CN (5.0 mL), H<sub>2</sub>O (5.0 mL), and DMC (2.5 mL) were combined and added. NaOH (1.0 mmol(L-1, 500 mg)) was added to the reaction solutions. The flask was equipped with a platinum plate (10 mm × 10 mm × 0.2 mm) as the cathodic electrode and a carbon plate (10 mm × 10 mm × 2.0 mm) as the anodic electrode. The reaction was in an ambient atmosphere. The reaction mixture was stirred and electrolyzed at a constant current of 10 mA under room temperature for 10 min.

Abundance

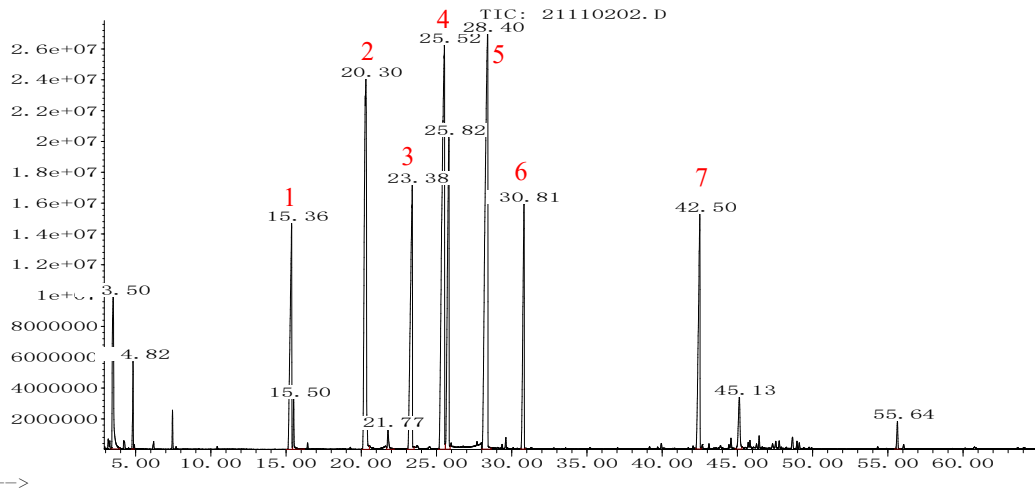

Time-->

1

Abundance

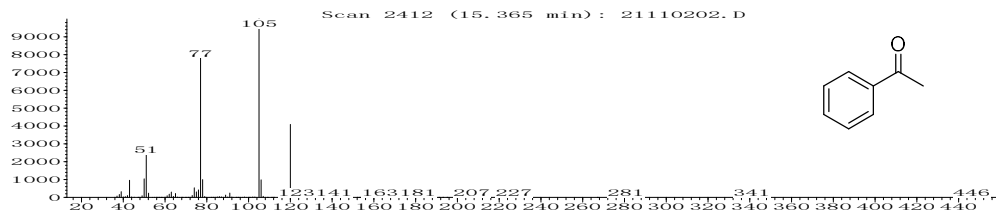

m/z-->

Abundance

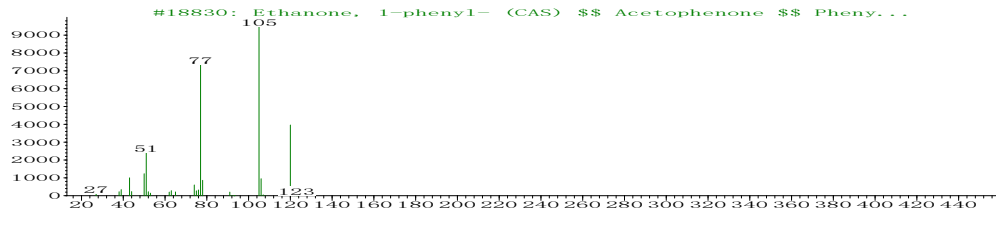

m/z-->

2

Abundance

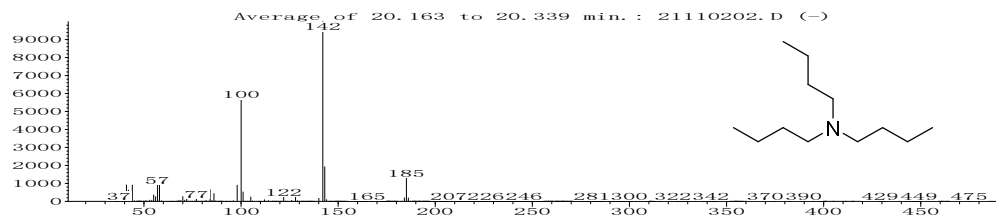

m/z-->

Abundance

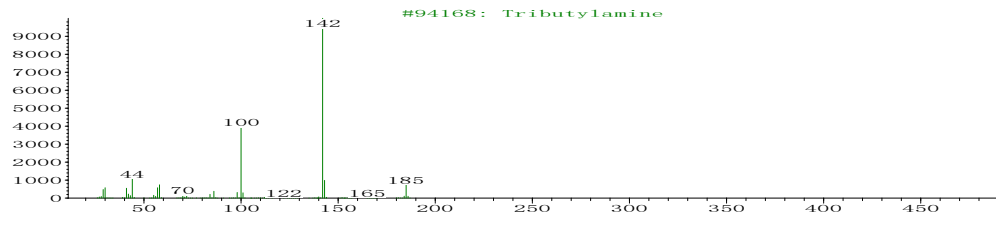

m/z-->

3

Abundance

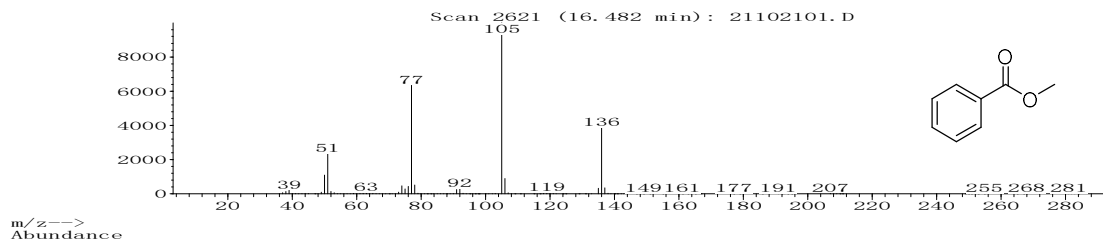

Abundance

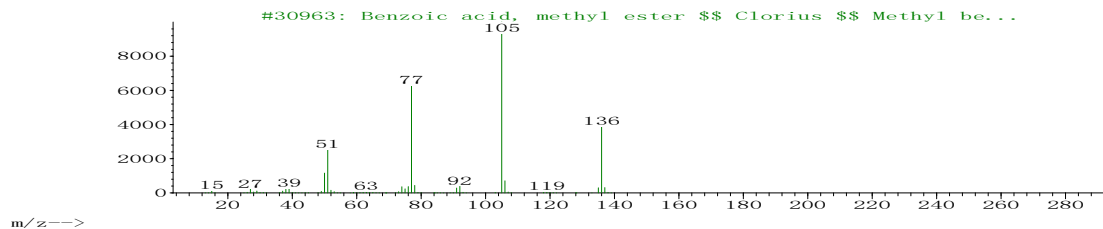

4

Abundance

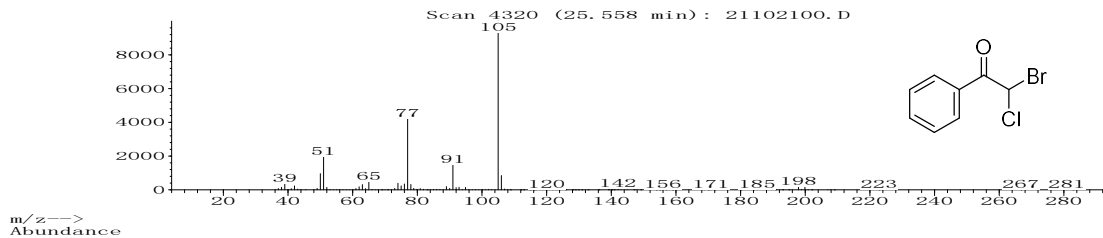

Abundance

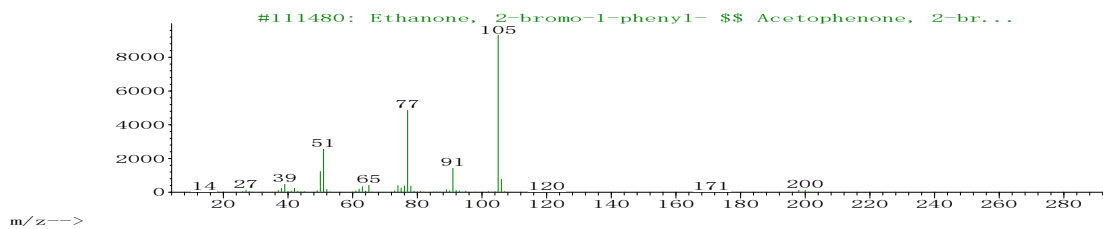

5

Abundance

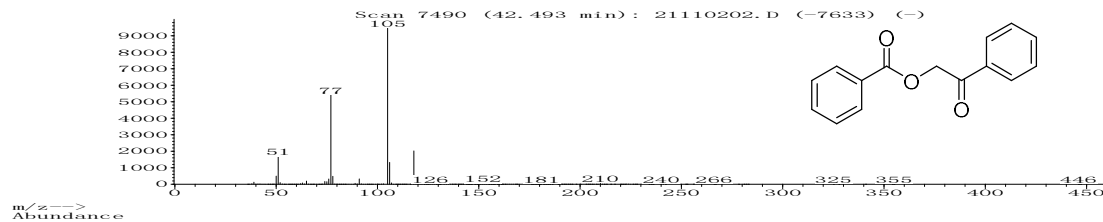

Abundance

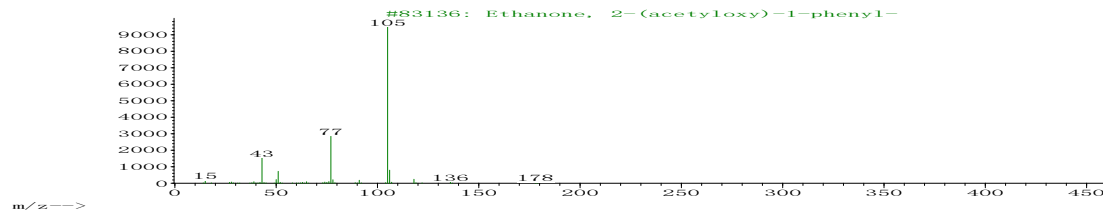

6

Abundance

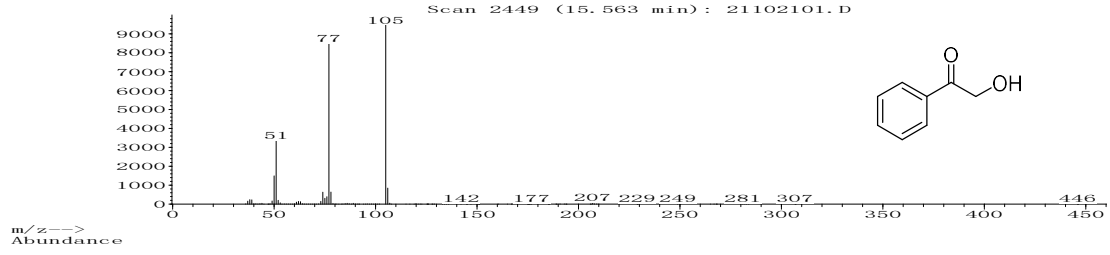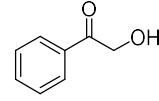

Abundance

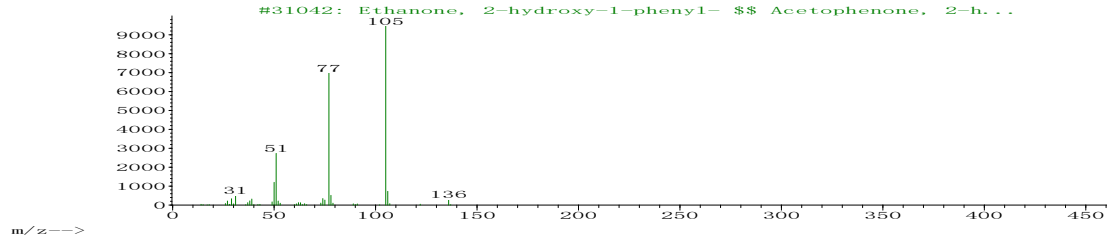

7

Abundance

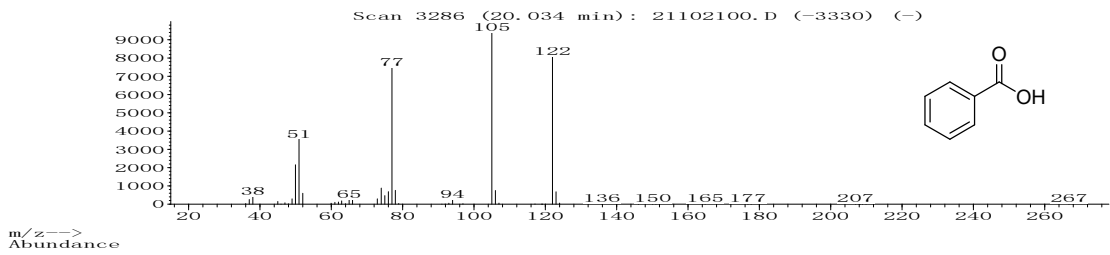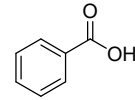

Abundance

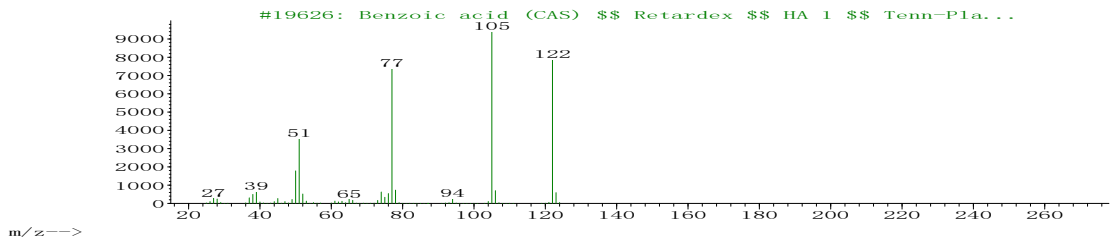

### 3.5.3 NaOH addition experiment without electricity

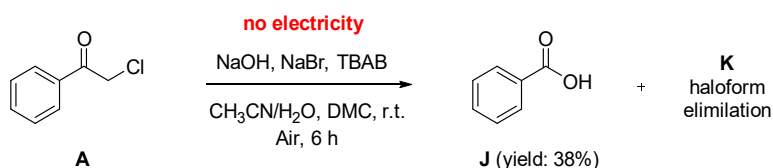

**Scheme S7.** NaOH addition experiment without electricity

In an oven-dried undivided two-necked flask (50 mL) equipped with a stir bar, 2-halo-acetophenone (200 mg, 1.0 mmol), TBAB(0.2 mmol, 55.6 mg), NaBr (1.0 mol·L<sup>-1</sup>, 725 mg), CH<sub>3</sub>CN (5.0 mL), H<sub>2</sub>O (5.0 mL), and DMC (2.5 mL) were combined and added. NaOH (1.0 mol(L-1, 500 mg) was added to the reaction solutions. No electricity was used. The reaction was in an ambient atmosphere. The reaction mixture was stirred at room temperature for 6 h. TLC, UV light as a visualizing agent, the reaction was monitored, and an ethanolic solution of phosphomolybdic acid and cerium sulfate and heat as a developing agent. When the material was no longer decreased, the solution was extracted with EtOAc (3 × 10 mL) and H<sub>2</sub>O (3 × 10 mL). The combined organic layer was dried with Na<sub>2</sub>SO<sub>4</sub> and filtered. The solvent was removed with a rotary evaporator. The pure product was obtained by flash chromatography on silica gel using EtOAc and petroleum ether as the eluent solvents. Then benzoic acid was isolated with a yield of 46.4 mg, 38%.

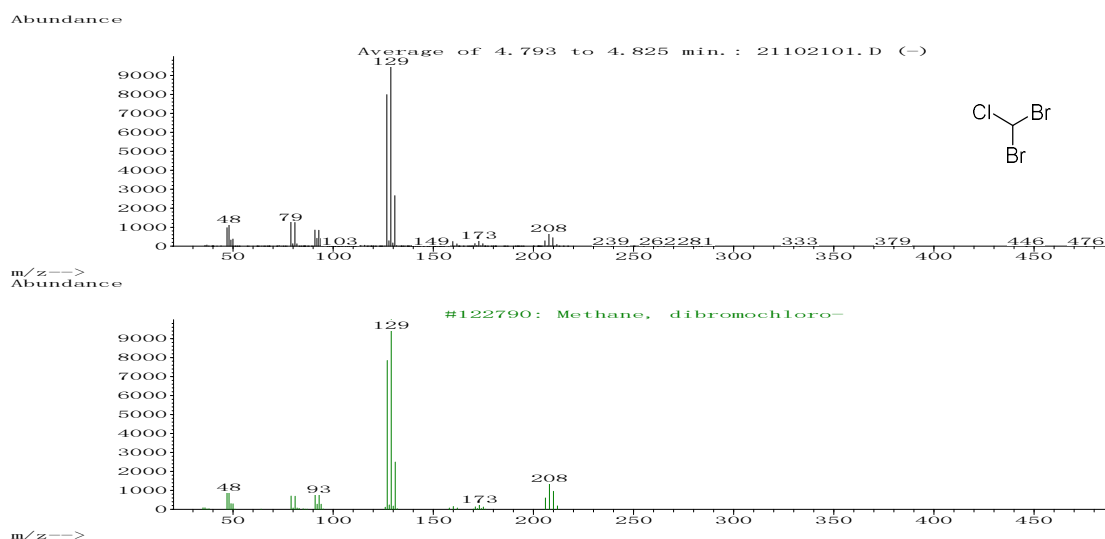

### 3.5.4 NBS experiment

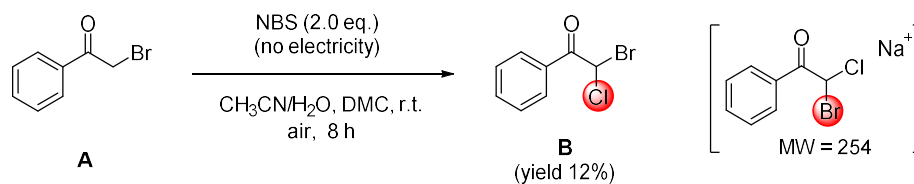

**Scheme S8.** NBS experiment

In an oven-dried undivided two-necked flask (250 mL) equipped with a stir bar, 2-bromoacetophenone (200 mg, 1.0 mmol), TBAC (56.4 mg, 0.2 mmol), NaCl (380 mg, 6.5 mmol), CH<sub>3</sub>CN (5.0 mL), H<sub>2</sub>O (5.0 mL), and DMC (2.5 mL) were combined and added. The reaction was in an ambient atmosphere, without electricity for 8 h.

GC-MS result for NBS experiment.

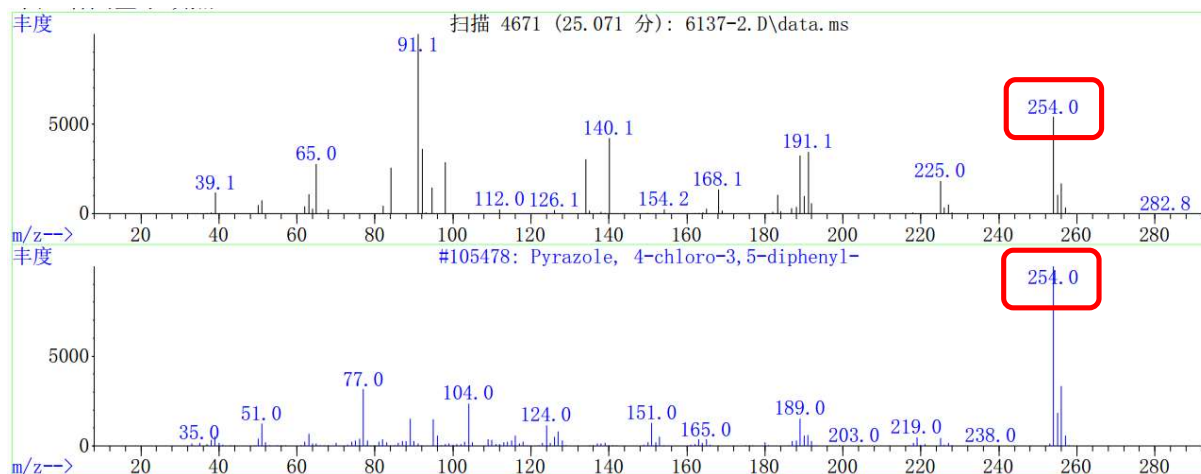

### 3..5.5 NaI experiment

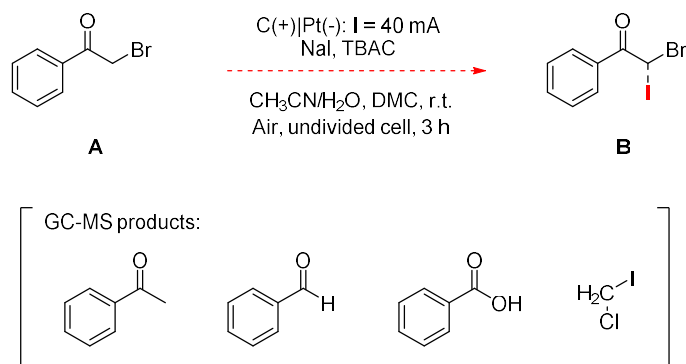

**Scheme S9.** NaI experiment

In an oven-dried undivided two-necked flask (250 mL) equipped with a stir bar, 2-bromoacetophenone (200 mg, 1.0 mmol), TBAC (56.4 mg, 0.2 mmol), NaI (715 mg, 6.5 mmol), CH<sub>3</sub>CN (5.0 mL), H<sub>2</sub>O (5.0 mL), and DMC (2.5 mL) were combined and added. The flask was equipped with a platinum plate (50 mm×50 mm×0.2 mm) as the cathodic electrode and a carbon plate (50 mm×50 mm×2 mm) as the anodic electrode. The reaction was in an ambient atmosphere. The reaction mixture was stirred and electrolyzed at a constant current of 40 mA under room temperature for 3 h.



GC-MS result for NaI experiment.

### 1) acetophenone

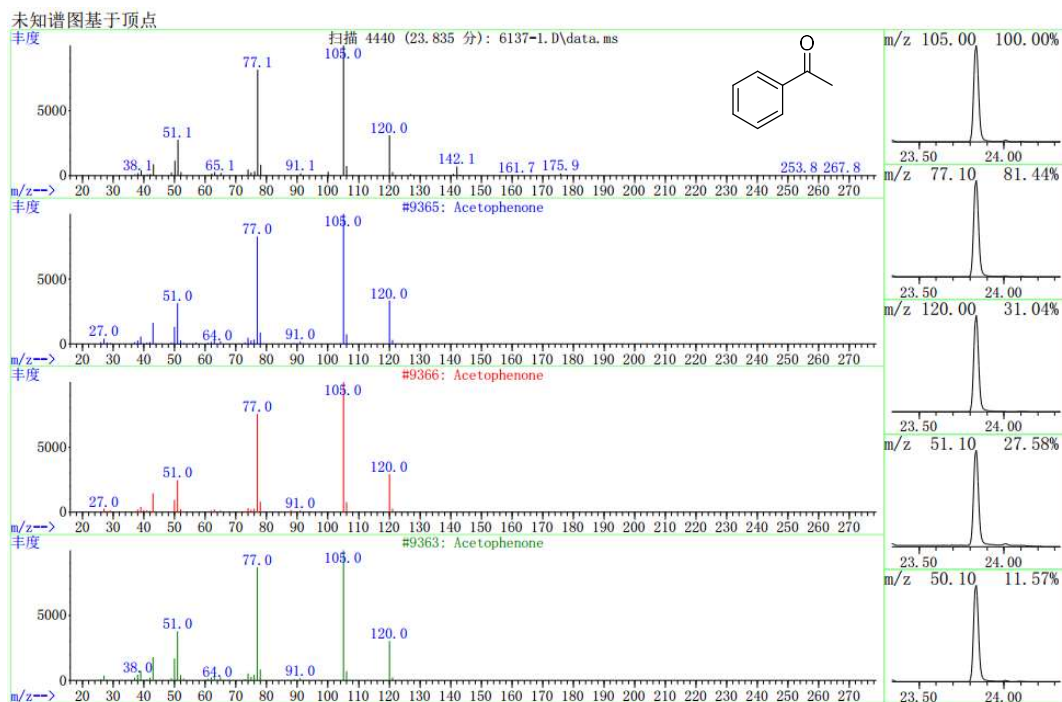

每个谱库中 3 个最匹配的记录。

Ref\# CAS\# 匹配度

C:\Database\NIST11.L

|   |              |      |             |    |
|---|--------------|------|-------------|----|
| 1 | Acetophenone | 9365 | 000098-86-2 | 94 |
| 2 | Acetophenone | 9366 | 000098-86-2 | 91 |
| 3 | Acetophenone | 9363 | 000098-86-2 | 91 |

## 2) benzaldehyde

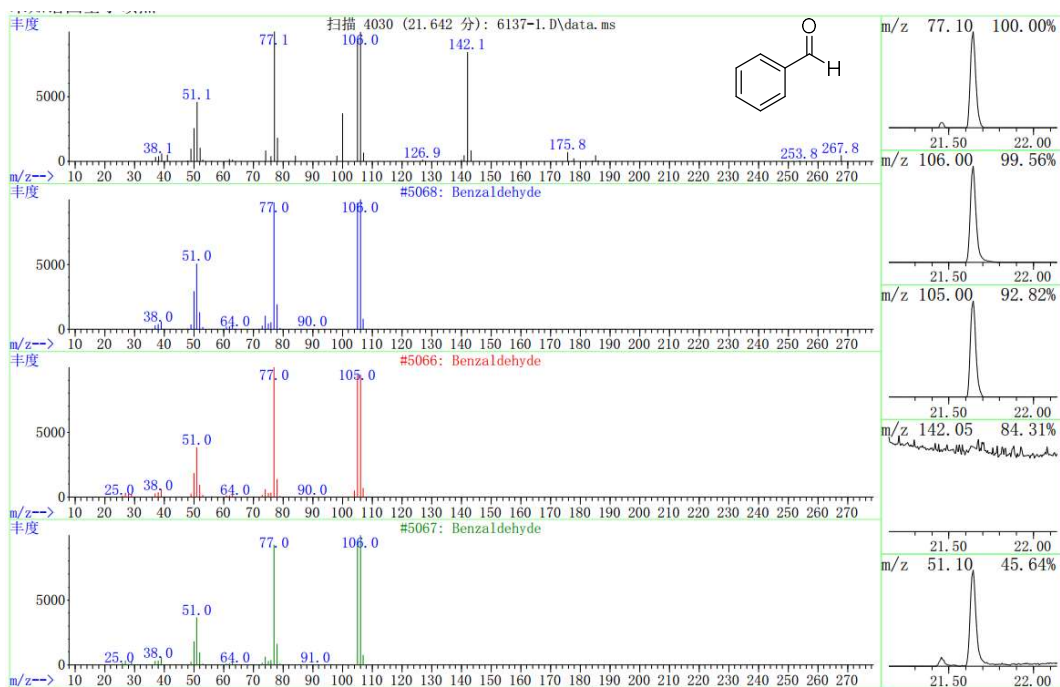

每个谱库中 3 个最匹配的记录。

| Ref\#                | CAS\#            | 匹配度 |
|----------------------|------------------|-----|
| C:\Database\NIST11.L |                  |     |
| 1                    | 5068 000100-52-7 | 91  |
| 2                    | 5066 000100-52-7 | 91  |
| 3                    | 5067 000100-52-7 | 64  |

### 3) benzoic acid

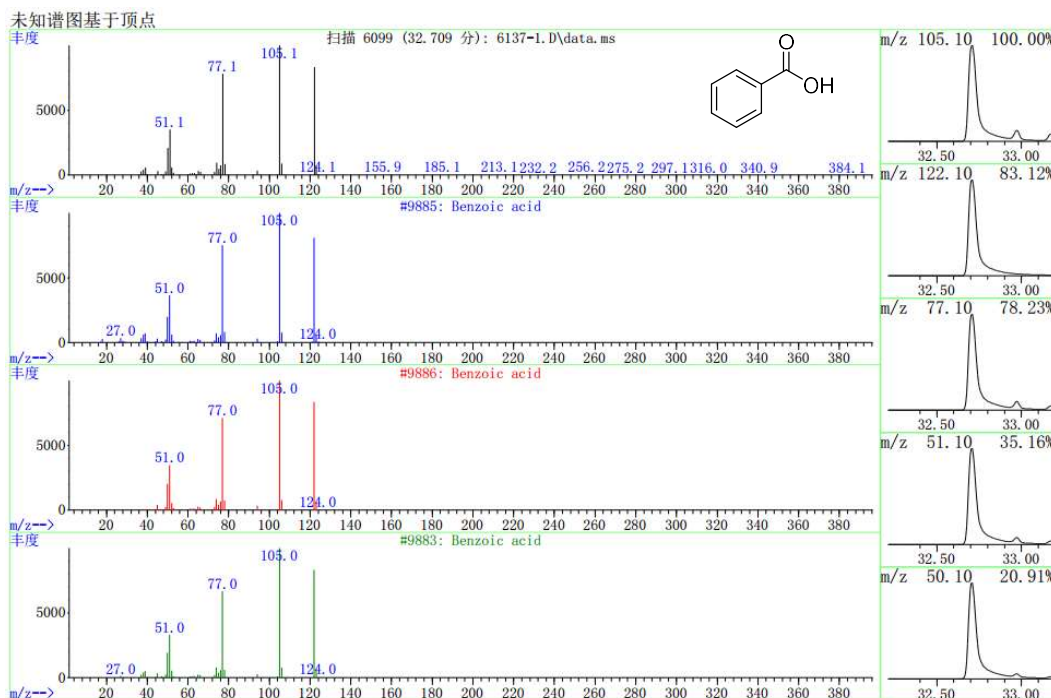

每个谱库中 3 个最匹配的记录。

Ref\# CAS\# 匹配度

C:\Database\NIST11.L

|   |              |      |             |    |
|---|--------------|------|-------------|----|
| 1 | Benzoic acid | 9885 | 000065-85-0 | 97 |
| 2 | Benzoic acid | 9886 | 000065-85-0 | 96 |
| 3 | Benzoic acid | 9883 | 000065-85-0 | 94 |

#### 4) chloriodomethane

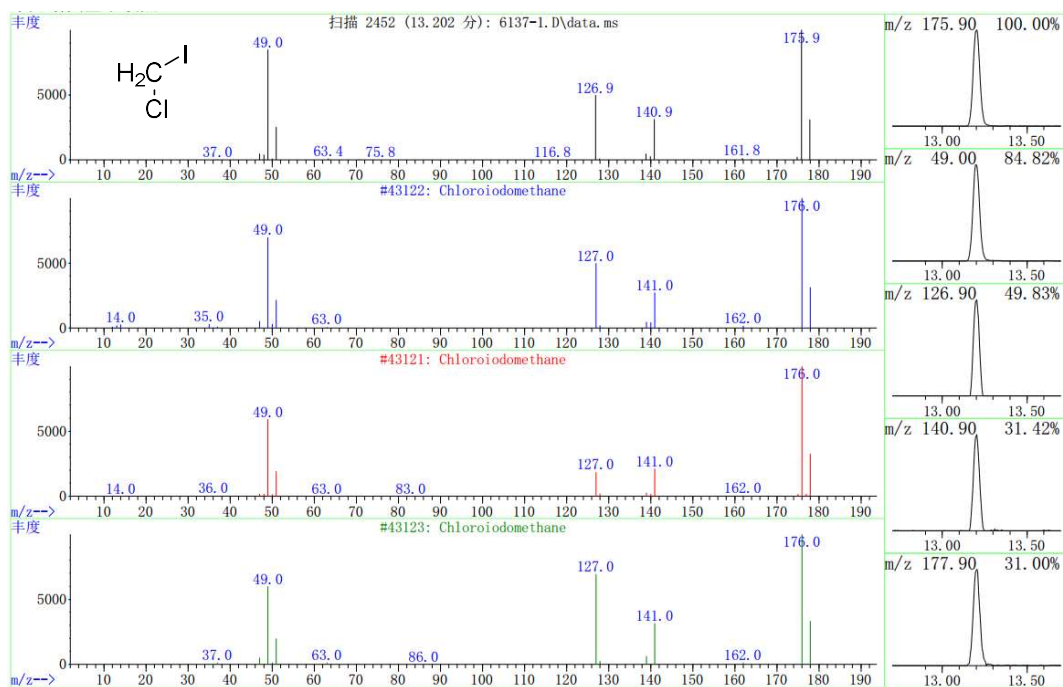

每个谱库中 3 个最匹配的记录。

|                      | Ref\# | CAS\#       | 匹配度 |
|----------------------|-------|-------------|-----|
| C:\Database\NIST11.L |       |             |     |
| 1 Chloriodomethane   | 43122 | 000593-71-5 | 91  |
| 2 Chloriodomethane   | 43121 | 000593-71-5 | 49  |
| 3 Chloriodomethane   | 43123 | 000593-71-5 | 43  |

### 3.5.6 1,2-dione experiment

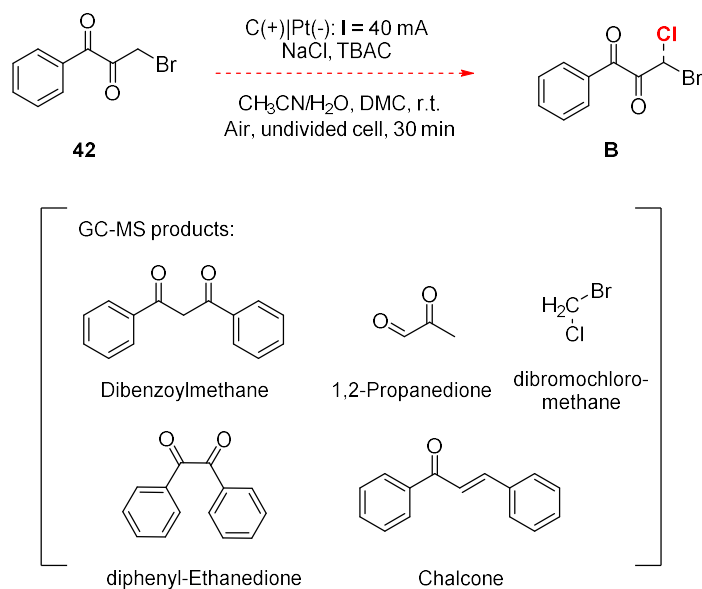

**Scheme S10.** 3-bromo-1-phenylpropane-1,2-dione experiment

In an oven-dried undivided two-necked flask (250 mL) equipped with a stir bar, 3-bromo-1-phenylpropane-1,2-dione (227 mg, 1.0 mmol), TBAC (56.4 mg, 0.2 mmol), NaI (715 mg, 6.5 mmol), CH<sub>3</sub>CN (5.0 mL), H<sub>2</sub>O (5.0 mL), and DMC (2.5 mL) were combined and added. The flask was equipped with a platinum plate (50 mm×50 mm×0.2 mm) as the cathodic electrode and a carbon plate (50 mm×50 mm×2 mm) as the anodic electrode. The reaction was in an ambient atmosphere. The reaction mixture was stirred and electrolyzed at a constant current of 40 mA under room temperature for 30 min.

GC-MS result for 1,2-dione experiment.

1) Dibenzoylmethane

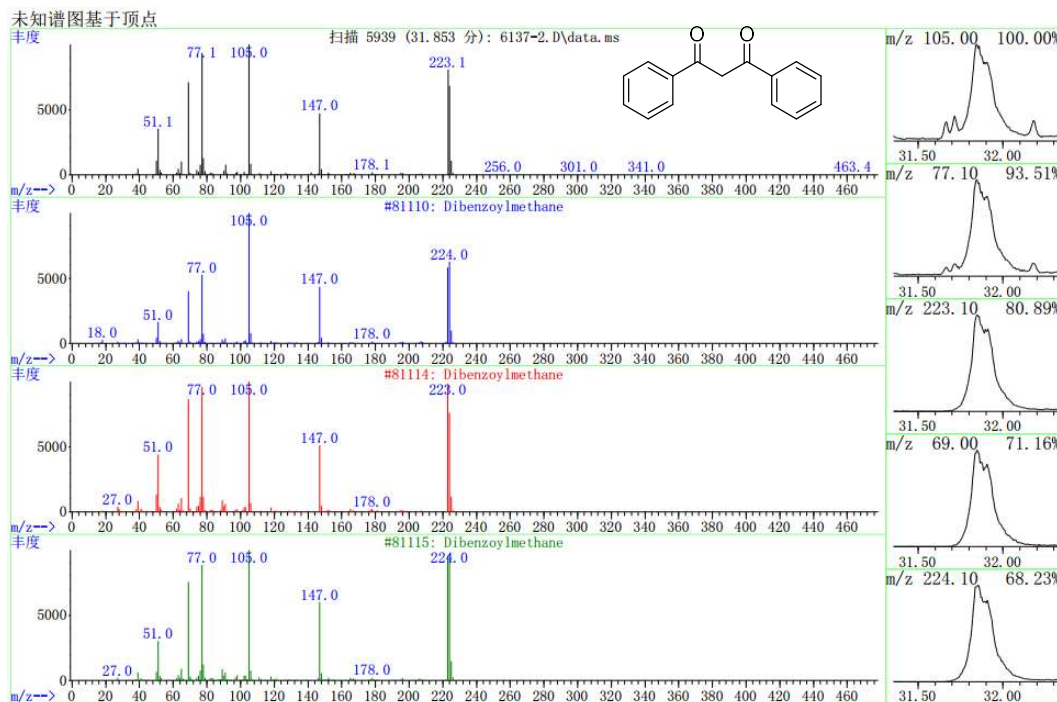

每个谱库中 3 个最匹配的记录。

Ref\# CAS\# 匹配度

| Ref\# | CAS\#             | 匹配度 |
|-------|-------------------|-----|
| 1     | 81110 000120-46-7 | 94  |
| 2     | 81114 000120-46-7 | 94  |
| 3     | 81115 000120-46-7 | 94  |





### 3) dibromochloro-methane

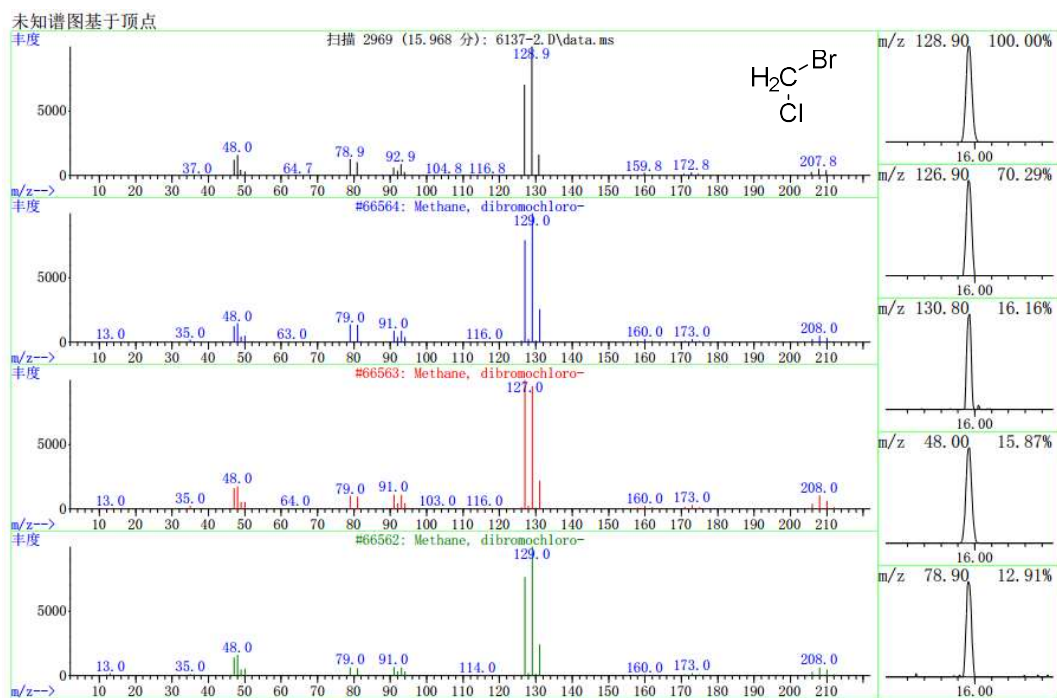

每个谱库中 3 个最匹配的记录。

| Ref\# | CAS\#             | 匹配度 |
|-------|-------------------|-----|
| 1     | 66564 000124-48-1 | 95  |
| 2     | 66563 000124-48-1 | 89  |
| 3     | 66562 000124-48-1 | 76  |

C:\Database\NIST11.L

1 Methane, dibromochloro-  
2 Methane, dibromochloro-  
3 Methane, dibromochloro-



#### 4) diphenyl-Ethanedione

未知谱图基于顶点

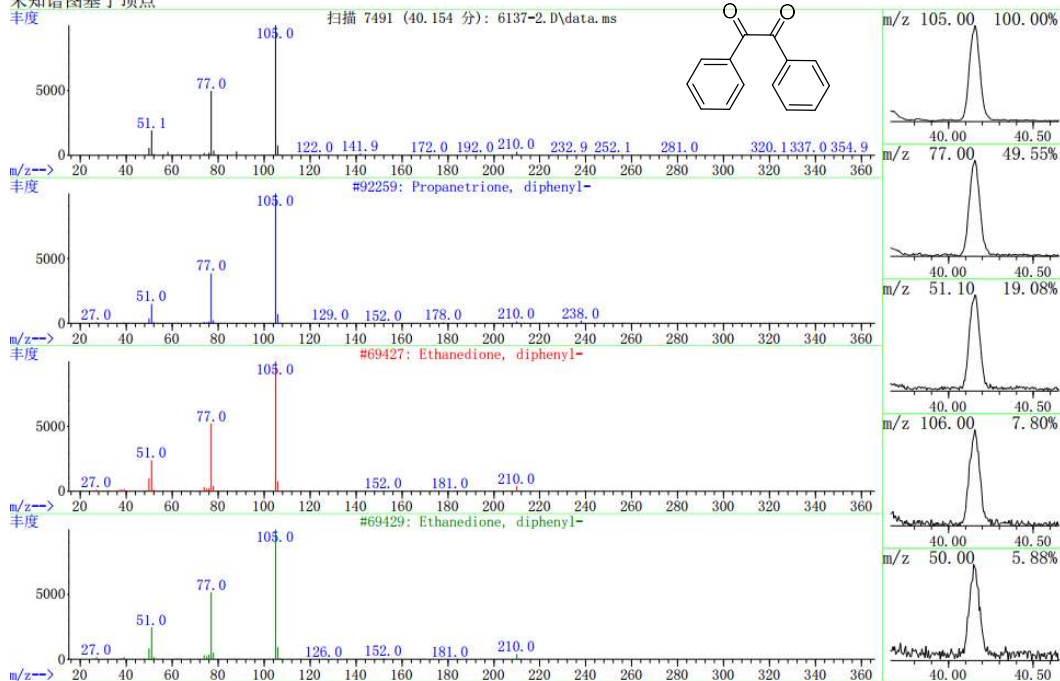

每个谱库中 3 个最匹配的记录。

|                      | Ref\# | CAS\#       | 匹配度 |
|----------------------|-------|-------------|-----|
| C:\Database\NIST11.L |       |             |     |
| 1                    | 92259 | 000643-75-4 | 78  |
| 2                    | 69427 | 000134-81-6 | 78  |
| 3                    | 69429 | 000134-81-6 | 74  |

## 5) Chalcone

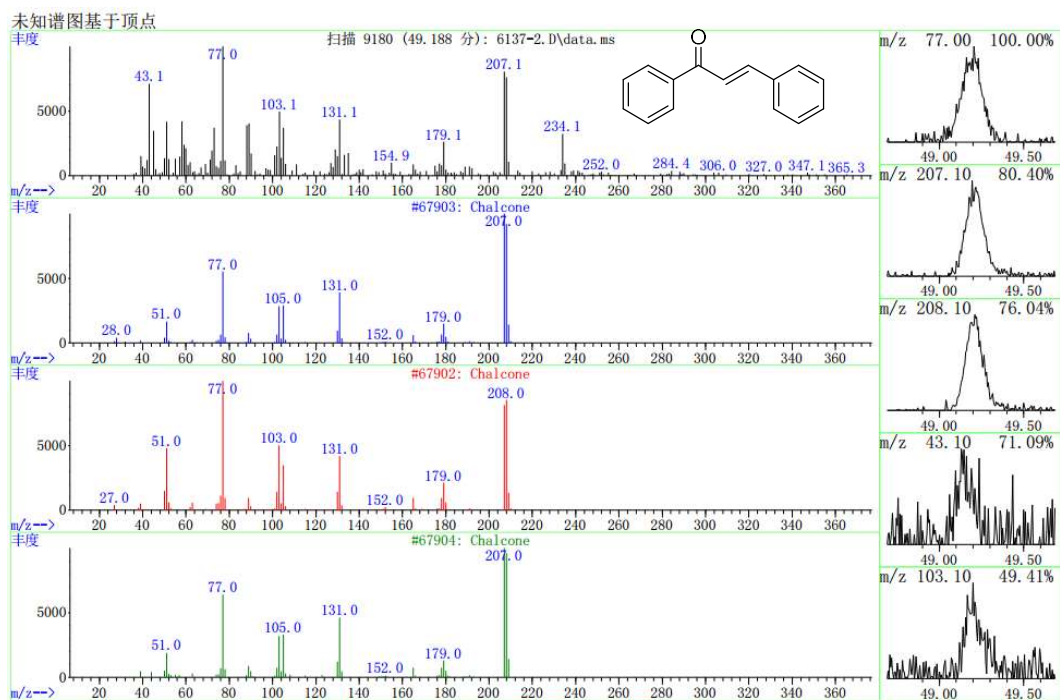

每个谱库中 3 个最匹配的记录。

Ref\# CAS\# 匹配度

C:\Database\NIST11.L

|   |          |       |             |    |
|---|----------|-------|-------------|----|
| 1 | Chalcone | 67903 | 000094-41-7 | 93 |
| 2 | Chalcone | 67902 | 000094-41-7 | 93 |
| 3 | Chalcone | 67904 | 000094-41-7 | 86 |

### 3.5.7 $\alpha$ -keto ester experiment

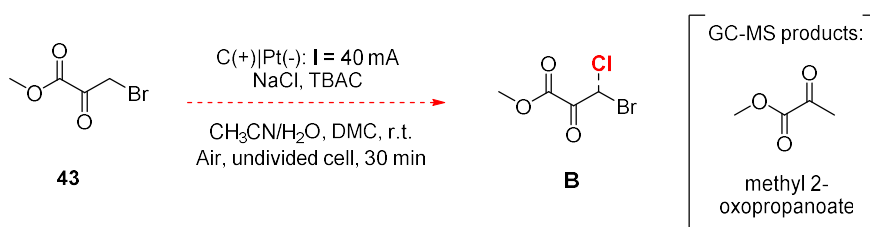

*Scheme S11.* methyl 3-bromo-2-oxopropanoate experiment

In an oven-dried undivided two-necked flask (250 mL) equipped with a stir bar, methyl 3-bromo-2-oxopropanoate (181 mg, 1.0 mmol), TBAC (56.4 mg, 0.2 mmol), NaI (715 mg, 6.5 mmol), CH<sub>3</sub>CN (5.0 mL), H<sub>2</sub>O (5.0 mL), and DMC (2.5 mL) were combined and added. The flask was equipped with a platinum plate (50 mm×50 mm×0.2 mm) as the cathodic electrode and a carbon plate (50 mm×50 mm×2 mm) as the anodic electrode. The reaction was in an ambient atmosphere. The reaction mixture was stirred and electrolyzed at a constant current of 40 mA under room temperature for 30 min.



### 3.5.8 NaCl, TBAC (without electricity) experiment

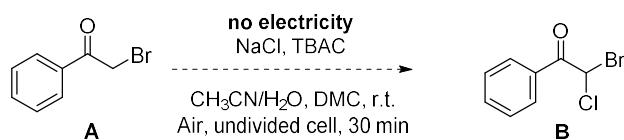

**Scheme S12.** NaOH addition experiment without electricity.

In an oven-dried undivided two-necked flask (250 mL) equipped with a stir bar, 2-bromoacetophenone (200 mg, 1.0 mmol), TBAC (56.4 mg, 0.2 mmol), NaCl (380 mg, 6.5 mmol), CH<sub>3</sub>CN (5.0 mL), H<sub>2</sub>O (5.0 mL), and DMC (2.5 mL) were combined and added. The reaction was in an ambient atmosphere, without electricity for 30 min.

### GC-MS map for NaCl, TBAC (without electricity) experiment

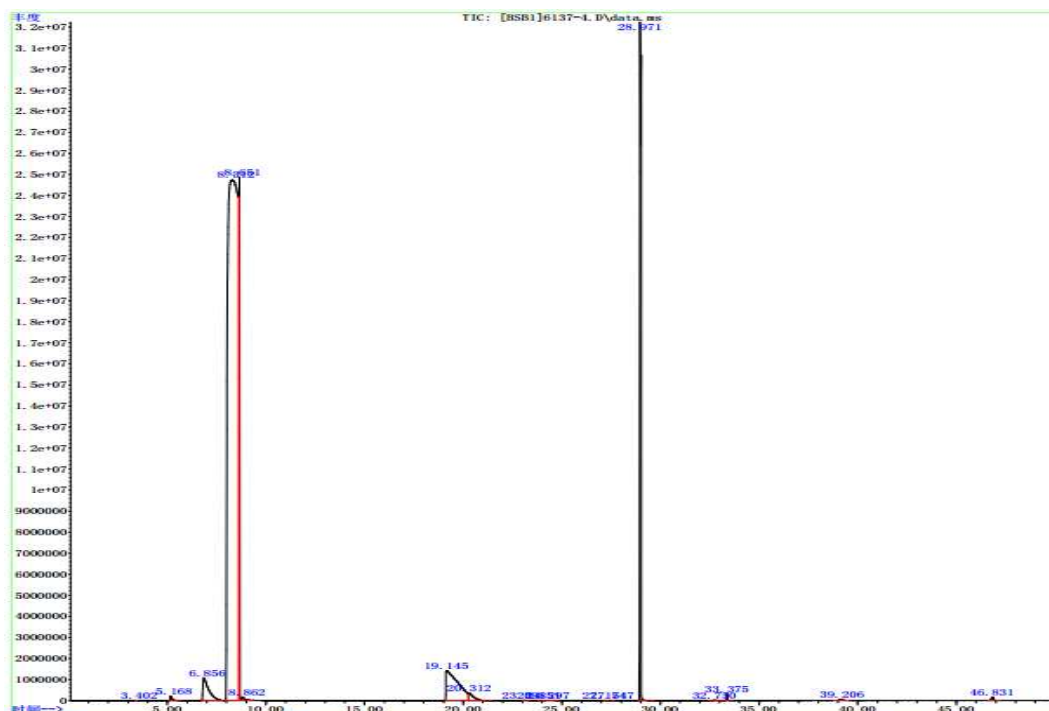

### 3.6 Radical inhibition experiment

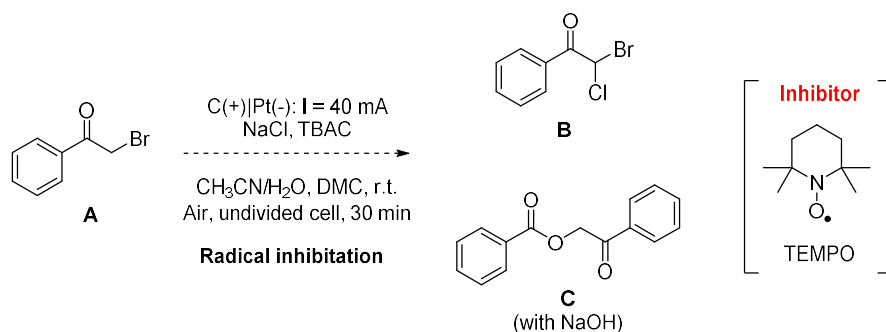

**Scheme S13.** Radical inhibition experiments.

In an oven-dried undivided two-necked flask (50 mL) equipped with a stir bar, 2-halo-acetophenone (200 mg, 1.0 mmol), TBAC (0.2 mmol, 55.6 mg), NaCl (1.0 mol·L<sup>-1</sup>, 725 mg), CH<sub>3</sub>CN (5.0 mL), H<sub>2</sub>O (5.0 mL), and DMC (2.5 mL) were combined and added. To test the radical inhibition of this electrocatalysis experiment, a chemical equivalent of TEMPO was added to the reaction solutions. The flask was equipped with a platinum plate (10 mm × 10 mm × 0.2 mm) as the cathodic electrode and a carbon plate (10 mm × 10 mm × 2 mm) as the anodic electrode. The reaction was in an ambient atmosphere. The reaction mixture was stirred and electrolyzed at a constant current of 40 mA under room temperature for 30 min. TLC, UV light as a visualizing agent, the reaction was monitored, and an ethanolic solution of phosphomolybdic acid and cerium sulfate and heat as a developing agent. Another experiment with an addition of a buffer of NaOH (1.0 mol·L<sup>-1</sup>, 500 mg) was also conducted for the radical inhibition experiment, and no dimer condensation product was observed.

### 3.7 EPR experiments

EPR spectra were recorded at room temperature on a Bruker EMX micro A300 spectrometer operated at 9.8543 GHz. Typical spectrometer parameters are shown as follows, sweep width: 6000 G; center field set: 3000 G; time constant: 81.92 ms; sweep time: 327.68 s modulation amplitude: 1.00 G; modulation frequency: 100 kHz; receiver gain:  $1.00 \times 10^3$ ; microwave power: 18.53 mW.

#### EPR experiment for halogenation:

In an oven-dried undivided two-necked flask (50 mL) equipped with a stir bar, 2-halo-acetophenone (200 mg, 1.0 mmol), TBAC (0.2 mmol, 55.6 mg), NaCl ( $1.0 \text{ mol} \cdot \text{L}^{-1}$ , 725 mg),  $\text{CH}_3\text{CN}$  (5.0 mL),  $\text{H}_2\text{O}$  (5.0 mL), and DMC (2.5 mL) were combined and added. The flask was equipped with a platinum plate ( $10 \text{ mm} \times 10 \text{ mm} \times 0.2 \text{ mm}$ ) as the cathodic electrode and a carbon plate ( $10 \text{ mm} \times 10 \text{ mm} \times 2 \text{ mm}$ ) as the anodic electrode. The reaction was in an ambient atmosphere. The reaction mixture was stirred and electrolyzed at a constant current of 40 mA under room temperature for 10 min.

EPR experiments were performed to detect the radical intermediates with the addition of free radical spin trapping agent 5,5-dimethyl-1-pyrroline N-oxide (DMPO). The control experiment was conducted without electricity. Results showed that no distinct free radical signal was detected under reaction conditions without electricity with any substrates; however, EPR signals were identified after the electrocatalysis. DMPO could quickly trap the free radicals to form a relatively stable radical (DMPO·R, R represents alkoxy radical) ( $g=2.00662$ ,  $aN=14.28$ ,  $aH^\beta=13.27$ ).

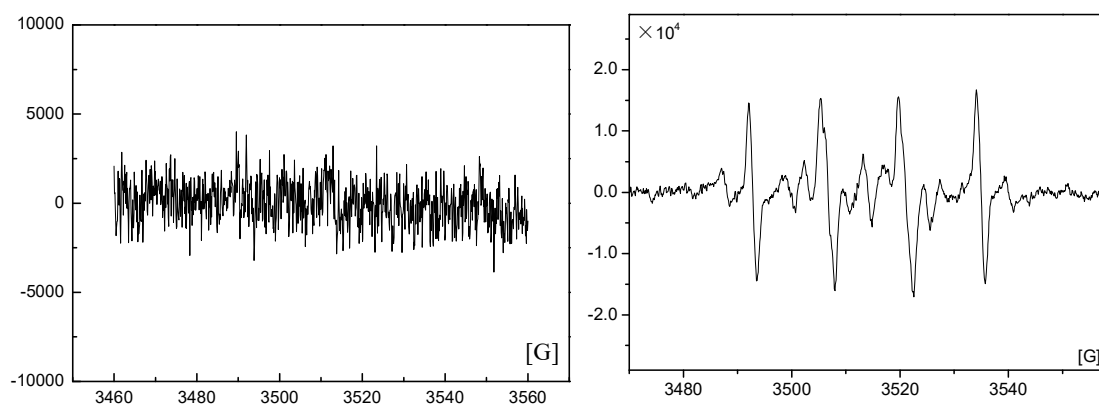

**Figure S3.** EPR of reactant A for electrohalogenation

### EPR experiment for dimer condensation:

In an oven-dried undivided two-necked flask (50 mL) equipped with a stir bar, 2-halo-acetophenone (200 mg, 1.0 mmol), TBAC (0.2 mmol, 55.6 mg), NaCl (1.0 mol·L<sup>-1</sup>, 725 mg), CH<sub>3</sub>CN (5.0 mL), H<sub>2</sub>O (5.0 mL), and DMC (2.5 mL) were combined and added. NaOH (1.0 mol(L-1, 500 mg) was added to the reaction solutions. The flask was equipped with a platinum plate (10 mm × 10 mm × 0.2 mm) as the cathodic electrode and a carbon plate (10 mm × 10 mm × 2 mm) as the anodic electrode. The reaction was in an ambient atmosphere. The reaction mixture was stirred and electrolyzed at a constant current of 40 mA under room temperature for 10 min.

EPR experiments were performed to detect the radical intermediates with the addition of free radical spin trapping agent 5,5-dimethyl-1-pyrroline N-oxide (DMPO). The control experiment was conducted without electricity. Results stated that no distinct free radical signal was detected under reaction conditions without electricity with any substrates; however, EPR signals were identified after the electrocatalysis. DMPO can quickly trap the free radicals to form a typical hydroxyl radical (DMPO·OH,  $g=2.00634$ ,  $aN=14.98$  G,  $aH^{\beta}=14.86$  G).

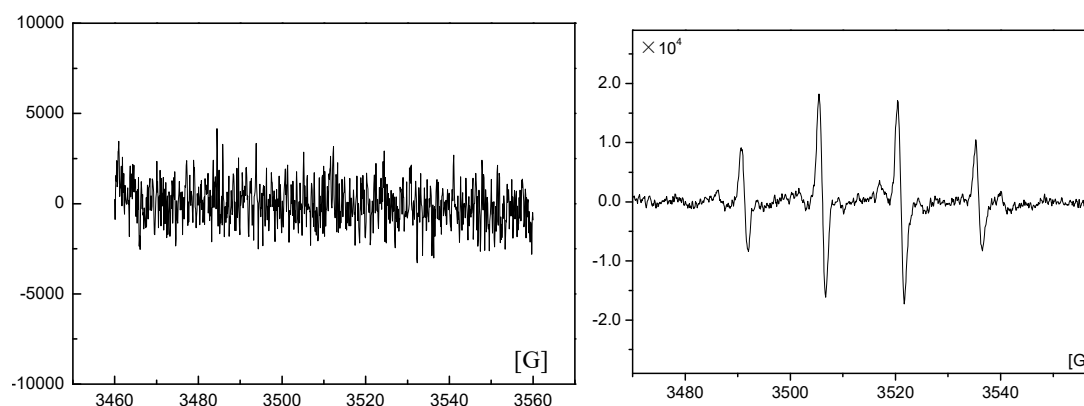

**Figure S4.** EPR of reactant A for dimer condensation



### 3.8 Microcoulometric experiments

Microcoulometric experiments was conducted to investigate the electro-catalysis reversibility and electron transfer number (n-value). For the halogenation experiments,  $Q_{\text{exp}} = it = 40 \times 0.001 \times 30 \times 60 = 72 \text{ C}$ ,  $Q_{\text{theor}} = 0.001 \times 1 \times 96500 = 96.5 \text{ C}$ . The Columbic yield (current efficiency) is  $96.5/72 \times 0.8 \times 100 = 107\% \cong 1$ . This means that the reaction involves in conversion of one haloketone molecule with one electron.

#### CV experiments for oxidation peak of A:

Using  $\text{CH}_3\text{CN}$  (20 mL), and  $\text{H}_2\text{O}$  (20 mL) as co-solvent. Without NaOH, cyclic voltammetry (CVs) experiments of reactant 2-bromo-acetophenone (A, 199.4 mg) were conducted at different scan rates. At a scan rate of 0.010 V/s, from  $-0.5 \text{ V}$  to  $2.0 \text{ V}$ , the oxidation peak of A was reversible ( $i_{\text{pa1}} = 0.32 \text{ mA}$ ,  $i_{\text{pc1}} = 0.28 \text{ mA}$ ,  $i_{\text{pa1}}/i_{\text{pc1}} = 1.1 \approx 1$ ). The relationship of  $E_{\text{pa}}$  and  $i_{\text{pa}}$  at different scan rate are  $E_{\text{pa}} = 0.0728 \text{ Log } i_{\text{pa1}} + 0.094$  ( $R^2 = 0.8397$ ). Results indicated that, in the electrohalogenation process the transferred electrons for the oxidation peak of A is one ( $n = 0.0712/0.0728 = 0.98 \approx 1$ ).

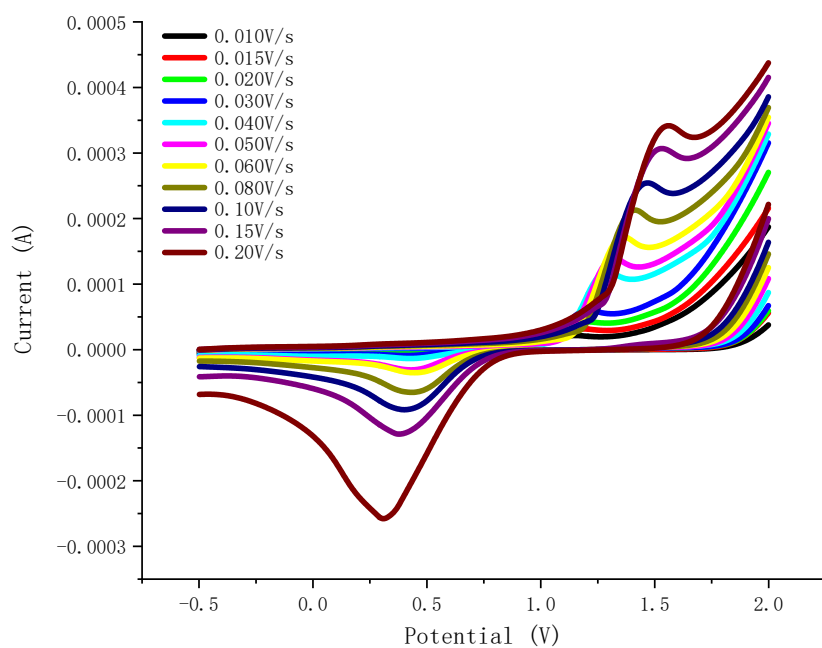

**Figure S5.** CVs of A at different scan rates

| $E_{pa1}$ | $i_{pa1}$             | $Lg i_{pa1}$ |
|-----------|-----------------------|--------------|
| 0.50      | $-2.04 \cdot 10^{-6}$ | -5.69        |
| 0.496     | $-4.07 \cdot 10^{-6}$ | -5.39        |
| 0.473     | $-4.49 \cdot 10^{-6}$ | -5.35        |
| 0.44      | $-8.78 \cdot 10^{-6}$ | -5.06        |
| 0.447     | $-1.36 \cdot 10^{-5}$ | -4.87        |
| 0.43      | $-3.10 \cdot 10^{-5}$ | -4.51        |
| 0.447     | $-3.50 \cdot 10^{-5}$ | -4.46        |
| 0.429     | $-6.46 \cdot 10^{-5}$ | -4.19        |
| 0.40      | $-9.12 \cdot 10^{-5}$ | -4.04        |
| 0.38      | $-1.29 \cdot 10^{-4}$ | -3.89        |
| 0.31      | $-2.58 \cdot 10^{-4}$ | -3.59        |

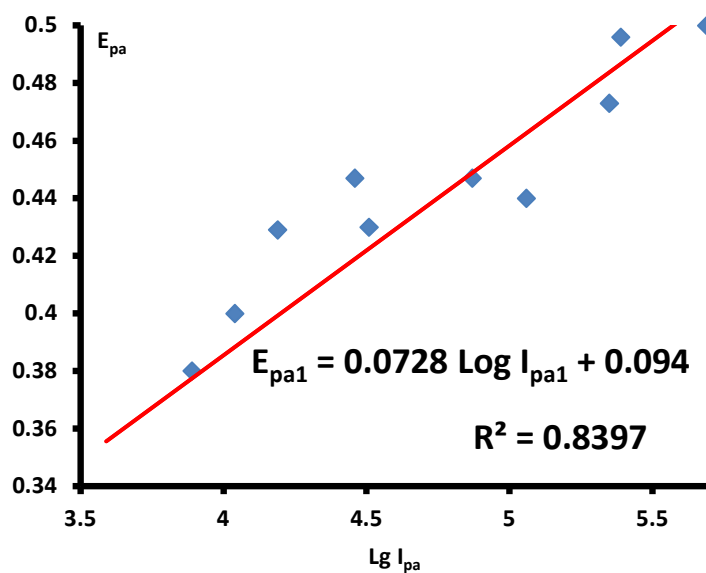

**Figure S6.** Line fitting of  $E_{pa1}$  and  $\log i_{pa1}$  for the oxidation peak of A

**CV experiments for oxidation peak of A, with NaOH addition:**

CH<sub>3</sub>CN (20 mL) and H<sub>2</sub>O (20 mL) as co-solvent. NaOH (200 mg) was added to the reaction solution, cyclic voltammetry (CVs) experiments of reactant 2-bromo-acetophenone (A, 199.4 mg) were conducted at different scan rates. At a scan rate of 0.010 V/s, from -0.5 V to 2.5 V, the oxidation peak of A was irreversible. The relationship of E<sub>pa</sub> and i<sub>pa</sub> at different scan rate are E<sub>pc</sub> = -0.6491 Log i<sub>pc</sub> + 3.6361 (R<sup>2</sup> = 0.808).

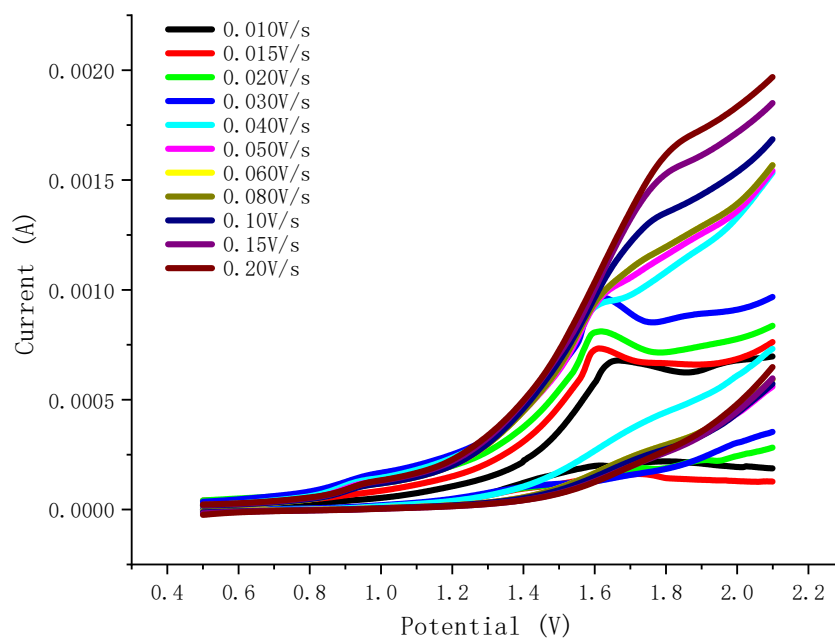

**Figure S7.** CVs of A at different scan rates with NaOH

| $E_{pc}$ | $i_{pc}$              | $\text{Lg } i_{pc}$ |
|----------|-----------------------|---------------------|
| 1.66     | $6.78 \times 10^{-4}$ | -3.17               |
| 1.61     | $7.33 \times 10^{-4}$ | -3.13               |
| 1.62     | $8.11 \times 10^{-4}$ | -3.09               |
| 1.622    | $9.64 \times 10^{-4}$ | -3.02               |
| 1.622    | $9.44 \times 10^{-4}$ | -3.025              |
| 1.64     | $9.93 \times 10^{-4}$ | -3.003              |
| 1.71     | $1.10 \times 10^{-3}$ | -2.96               |
| 1.75     | $1.16 \times 10^{-3}$ | -2.94               |
| 1.80     | $1.35 \times 10^{-3}$ | -2.87               |
| 1.82     | $1.55 \times 10^{-3}$ | -2.81               |
| 1.86     | $1.70 \times 10^{-3}$ | -2.77               |

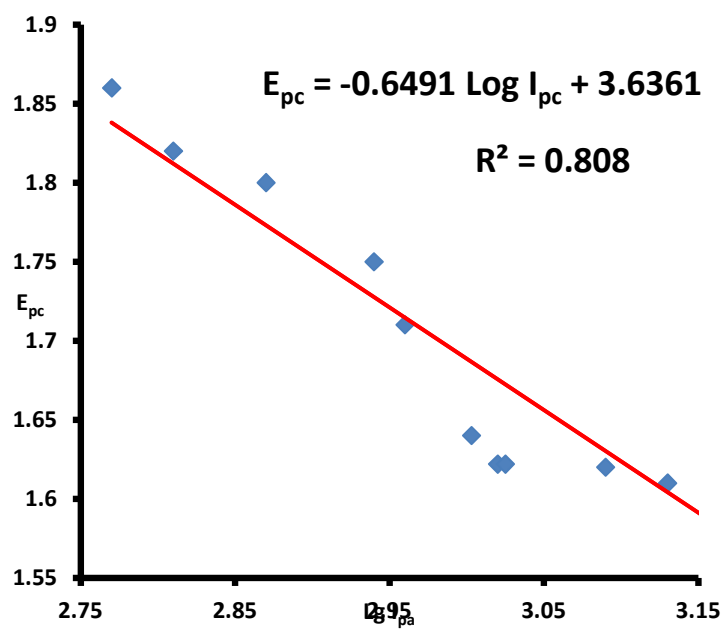

**Figure S8.** Line fitting of  $E_{pa1}$  and  $\log i_{pa1}$  for the oxidation peak of A (with NaOH addition)

### CV experiments for oxidation peak of Ferrocene:

Using CH<sub>3</sub>CN (20 mL) and H<sub>2</sub>O (20 mL) as co-solvent. Cyclic voltammetry (CVs) experiments of Ferrocene (186.0 mg) were conducted at different scan rates. At a scan rate of 0.010 V/s, from 0 V to 0.8 V, the oxidation peak of Ferrocene was irreversible. The relationship of  $E_{pa}$  and  $i_{pa}$  at different scan rate are  $E_{pc} = 0.0712 \text{ Log } i_{pa} - 0.1033$  ( $R^2 = 0.9599$ ).

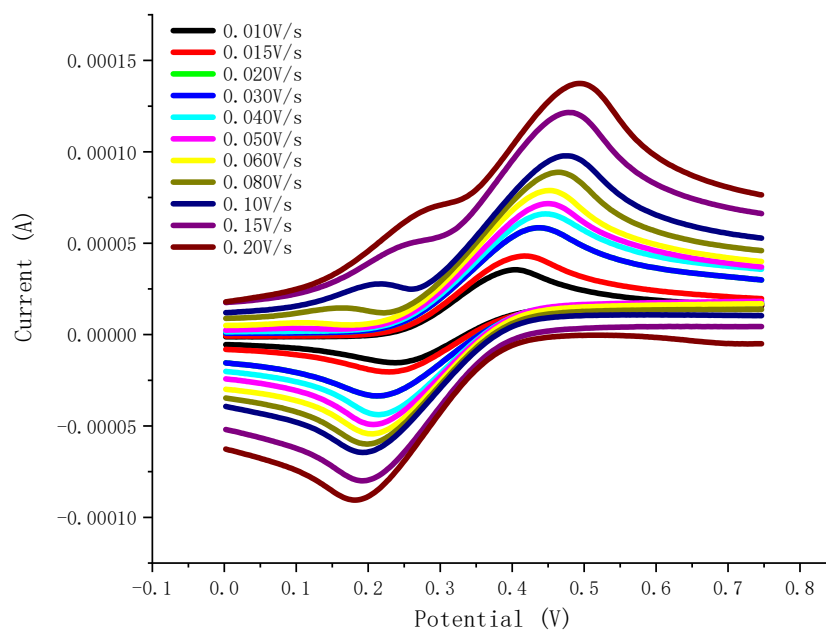

**Figure S9.** CVs of Ferrocene at different scan rates

| $E_{pa}$ | $i_{pa}$               | $\text{Lg } i_{pa}$ |
|----------|------------------------|---------------------|
| 0.24     | $-1.54 \cdot 10^{-5}$  | -4.81               |
| 0.23     | $-2.02 \cdot 10^{-5}$  | -4.69               |
| 0.211    | $-3.342 \cdot 10^{-5}$ | -4.475              |
| 0.212    | $-3.339 \cdot 10^{-5}$ | -4.476              |
| 0.213    | $-4.37 \cdot 10^{-5}$  | -4.36               |
| 0.206    | $-4.92 \cdot 10^{-5}$  | -4.31               |
| 0.204    | $-5.43 \cdot 10^{-5}$  | -4.27               |
| 0.20     | $-5.97 \cdot 10^{-5}$  | -4.22               |
| 0.192    | $-6.44 \cdot 10^{-5}$  | -4.19               |
| 0.19     | $-7.99 \cdot 10^{-5}$  | -4.10               |
| 0.18     | $-9.07 \cdot 10^{-5}$  | -4.04               |

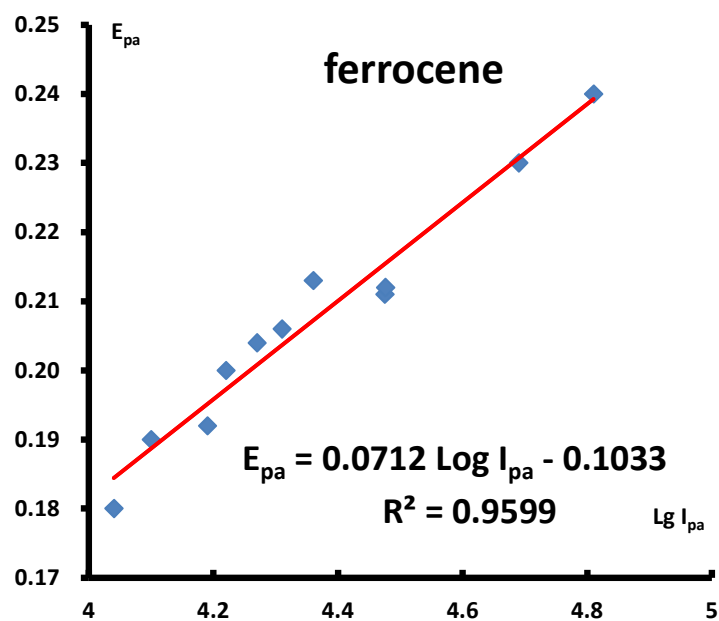

*Figure S10.* Line fitting of  $E_{pa1}$  and  $\log i_{pa1}$  for the oxidation peak of Ferrocene

### 3.9 Cyclic voltammetry experiments

Cyclic voltammograms were conducted on a Metrohm PGSTAT302N potentiostat and performed in a three-electrode cell connected to a Schlenk line under nitrogen at room temperature. The working electrode was a carbon plate electrode. The counter electrode was a platinum wire. The reference was a Hg/Hg<sub>2</sub>Cl<sub>2</sub> electrode submerged in saturated aqueous KBr solution and separated from the reaction by a salt bridge.

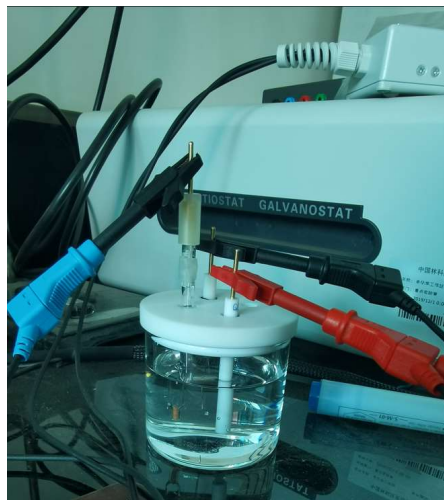

*Figure S11.* Cyclic voltammograms experiments

**(A) CV Procedure for NaCl.** A mixed solvent (CH<sub>3</sub>CN/H<sub>2</sub>O = 15 mL /15 mL) containing NaCl (1.19g, 0.01 mol·L<sup>-1</sup>, 5.0 chemical equivalent), was added into the electrochemical cell in cyclic voltammetry experiments. A constant current of 1 mA. The scan rate was 0.10 V/s, ranging from -2.0 V to 3.0 V.

**(B) CV Procedure for NaCl and 2-bromo-acetophenone.** A mixed solvent (CH<sub>3</sub>CN/H<sub>2</sub>O = 15 mL /15 mL) containing NaCl (1.19g, 0.01 mol·L<sup>-1</sup>, 5.0 chemical equivalent) and 2-bromo-acetophenone (1.5459g, 0.01 mol·L<sup>-1</sup>, 1.0 chemical equivalent), was added into the electrochemical cell in cyclic voltammetry experiments. A constant current of 1 mA. The scan rate was 0.10 V/s, ranging from -2.0 V to 3.0 V.

**(C) CV Procedure for NaBr.** A mixed solvent (CH<sub>3</sub>CN/H<sub>2</sub>O = 15 mL /15 mL) containing NaBr (0.52 g, 0.01 mol·L<sup>-1</sup>, 5.0 chemical equivalent), was added into the electrochemical cell in cyclic voltammetry experiments. A constant current of 1 mA. The scan rate was 0.10 V/s,

ranging from -2.0 V to 3.0 V.

**(D) CV Procedure for NaF.** A mixed solvent ( $\text{CH}_3\text{CN}/\text{H}_2\text{O} = 15 \text{ mL} / 15 \text{ mL}$ ) containing NaF (0.21 g,  $0.01 \text{ mol}\cdot\text{L}^{-1}$ , 5.0 chemical equivalent), was added into the electrochemical cell in cyclic voltammetry experiments. A constant current of 1 mA. The scan rate was 0.10 V/s, ranging from -1.5 V to 2.5 V.

**(E) CV Procedure for NaOH.** A mixed solvent ( $\text{CH}_3\text{CN}/\text{H}_2\text{O} = 15 \text{ mL} / 15 \text{ mL}$ ) containing NaOH (0.20g,  $0.01 \text{ mol}\cdot\text{L}^{-1}$ , 5.0 chemical equivalent), was added into the electrochemical cell in cyclic voltammetry experiments. A constant current of 1 mA. The scan rate was 0.10 V/s, ranging from -2.0 V to 2.5 V.

**(F) CV Procedure for NaOH and 2-bromo-acetophenone.** A mixed solvent ( $\text{CH}_3\text{CN}/\text{H}_2\text{O} = 15 \text{ mL} / 15 \text{ mL}$ ) containing NaOH (0.20g,  $0.01 \text{ mol}\cdot\text{L}^{-1}$ , 5.0 chemical equivalent) and 2-bromo-acetophenone (1.5459g,  $0.01 \text{ mol}\cdot\text{L}^{-1}$ , 1.0 chemical equivalent), was added into the electrochemical cell in cyclic voltammetry experiments. A constant current of 10 mA. The scan rate was 0.10 V/s, ranging from -2.0 V to 2.5 V.

**(G) CV Procedure for NaCl, NaOH and 2-bromo-acetophenone.** A mixed solvent ( $\text{CH}_3\text{CN}/\text{H}_2\text{O} = 15 \text{ mL} / 15 \text{ mL}$ ) containing NaCl (1.19g,  $0.01 \text{ mol}\cdot\text{L}^{-1}$ , 5.0 chemical equivalent), NaOH (0.20g,  $0.01 \text{ mol}\cdot\text{L}^{-1}$ , 5.0 chemical equivalent) and 2-bromo-acetophenone (1.5459g,  $0.01 \text{ mol}\cdot\text{L}^{-1}$ , 1.0 chemical equivalent), was added into the electrochemical cell in cyclic voltammetry experiments. A constant current of 1 mA. The scan rate was 0.10 V/s, ranging from -1.0 V to 3.0 V.

**(H) CV Procedure for TBAC.** A mixed solvent ( $\text{CH}_3\text{CN}/\text{H}_2\text{O} = 15 \text{ mL} / 15 \text{ mL}$ ) containing TBAC (0.3230g,  $0.01 \text{ mol}\cdot\text{L}^{-1}$ , 1.0 chemical equivalent), was added into the electrochemical cell in cyclic voltammetry experiments. A constant current of 1 mA. The scan rate was 0.10 V/s, ranging from -0.7 V to 2.5 V.



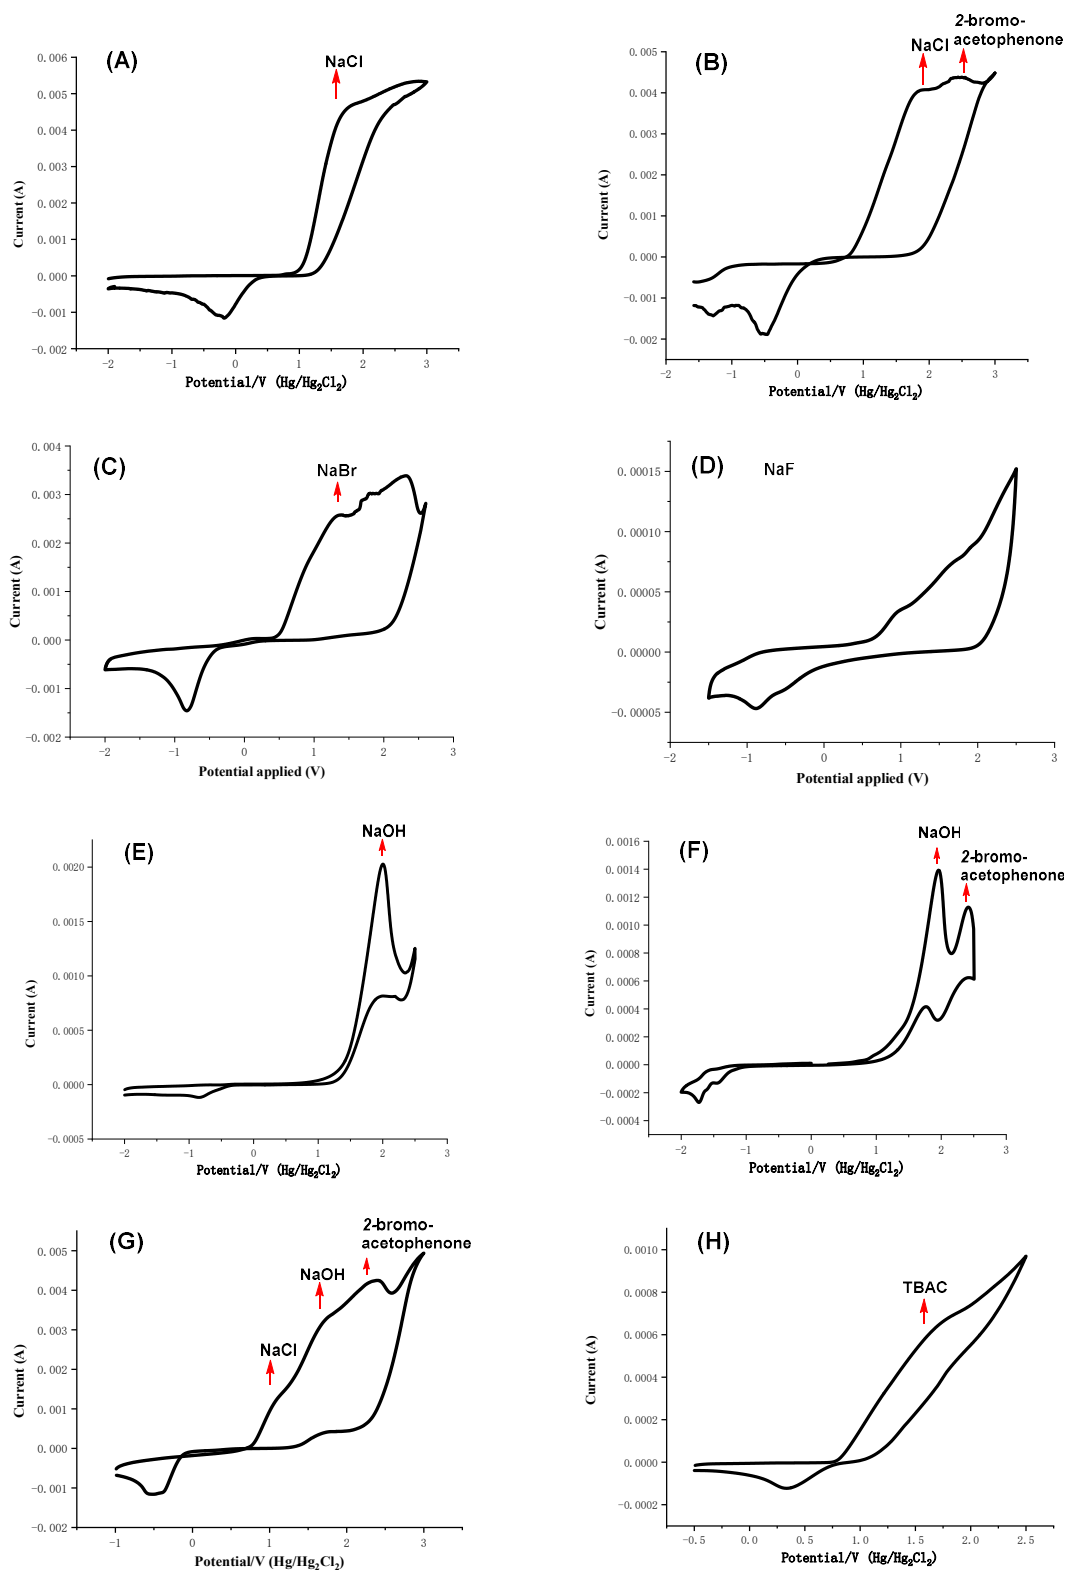

Figure S12. Cyclic voltammograms maps

### 3.10 GC-MS experiment for electro-fluorination

In an oven-dried undivided two-necked flask (50 mL) equipped with a stir bar, 2-bromo-acetophenone (200 mg, 1.0 mmol), TBAB (50 mg, 0.2 mmol), KBr (1.0 mol·L<sup>-1</sup>, 6.5 mmol), CH<sub>3</sub>CN (5.0 mL), H<sub>2</sub>O (5.0 mL), and DMC (2.5 mL) were combined and added. The flask was equipped with a platinum plate (10 mm × 10 mm × 0.2 mm) as the cathodic electrode and a carbon plate (10 mm × 10 mm × 2 mm) as the anodic electrode. The reaction was in an ambient atmosphere. The reaction mixture was stirred and electrolyzed at a constant current of 40 mA under room temperature for 30 min. The reaction was conducted with the GC-MS.

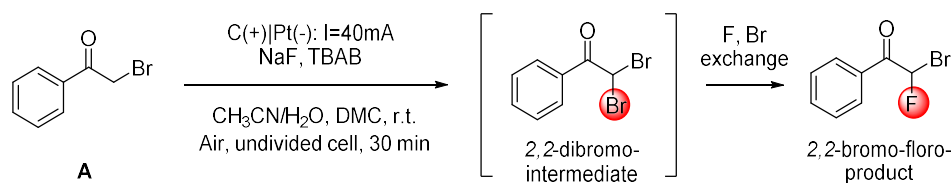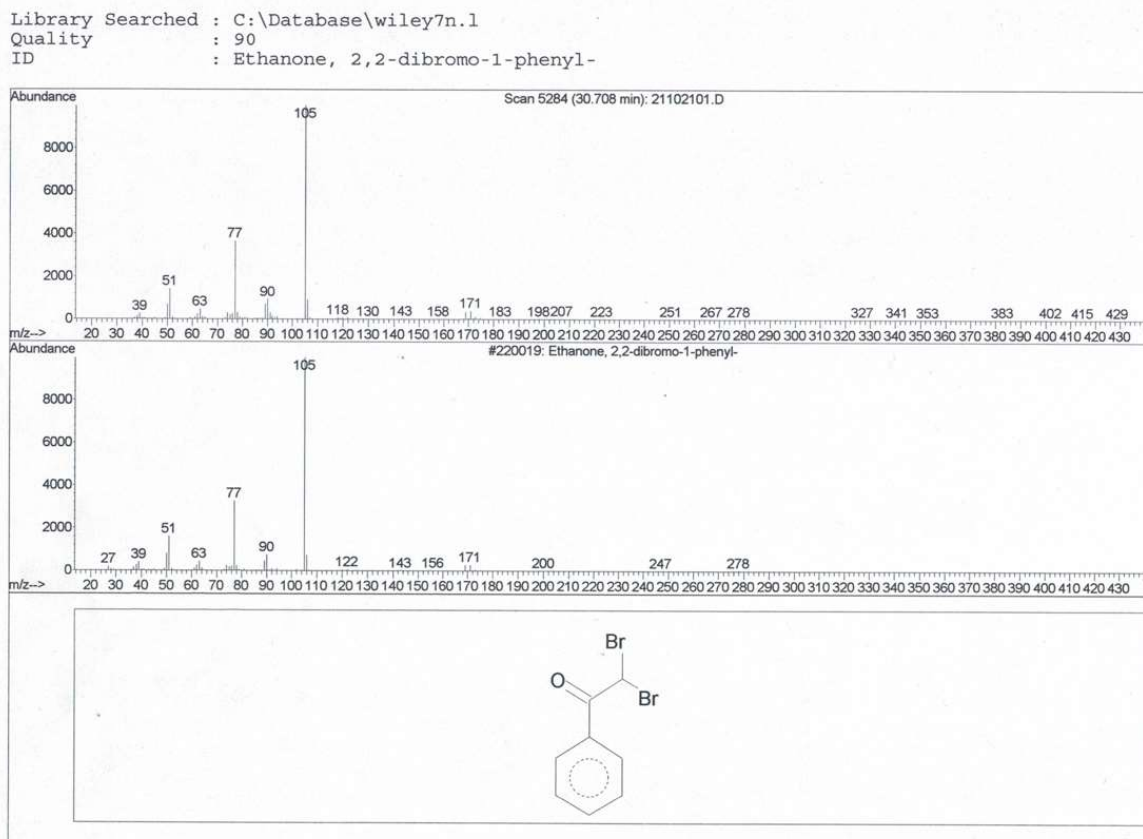

**Scheme S14.** GC-MS analysis of 2,2-dibromo-intermediate in TBAB involved fluorination

## 4. $^1\text{H-NMR}$ $^{13}\text{C-NMR}$ , and $^{19}\text{F-NMR}$ spectra

### $^1\text{H-NMR}$ (400 MHz, $\text{CDCl}_3$ )

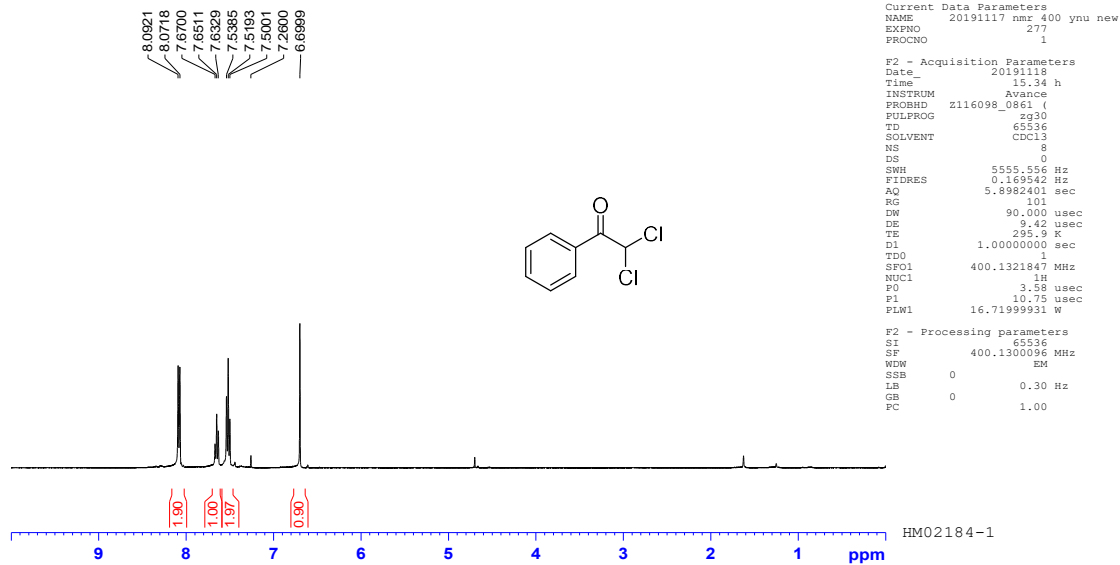

### $^{13}\text{C-NMR}$ (100 MHz, $\text{CDCl}_3$ )

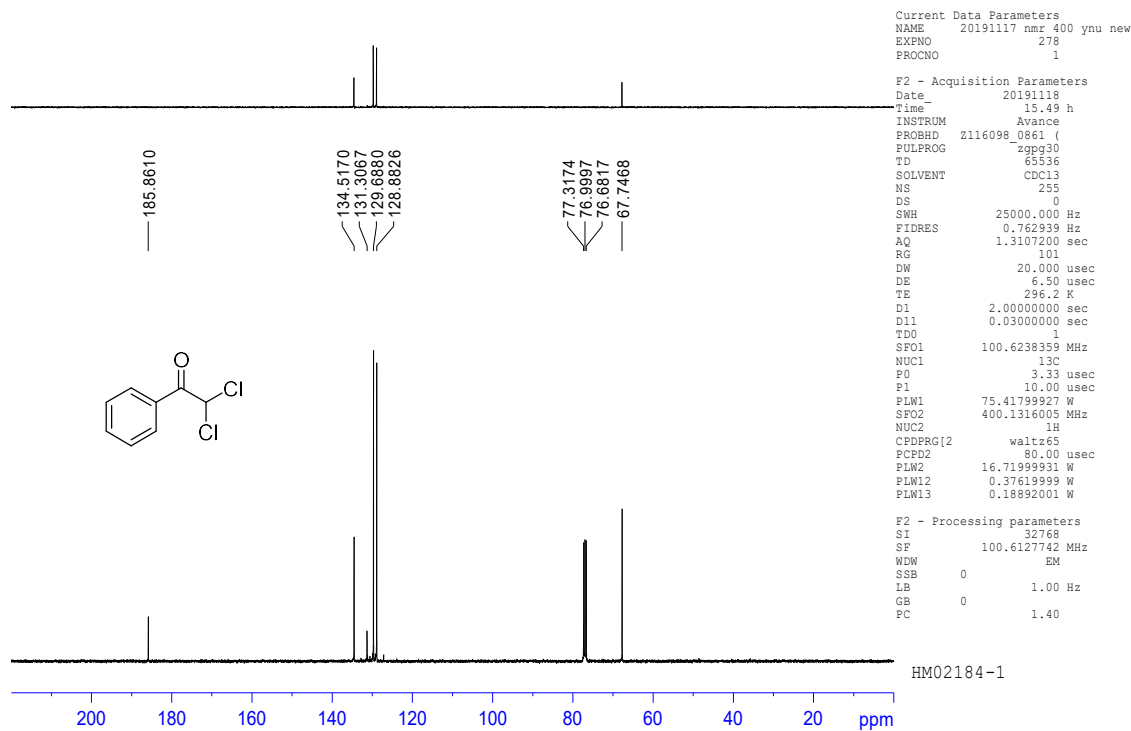

# <sup>1</sup>H-NMR (400 MHz, CDCl<sub>3</sub>)

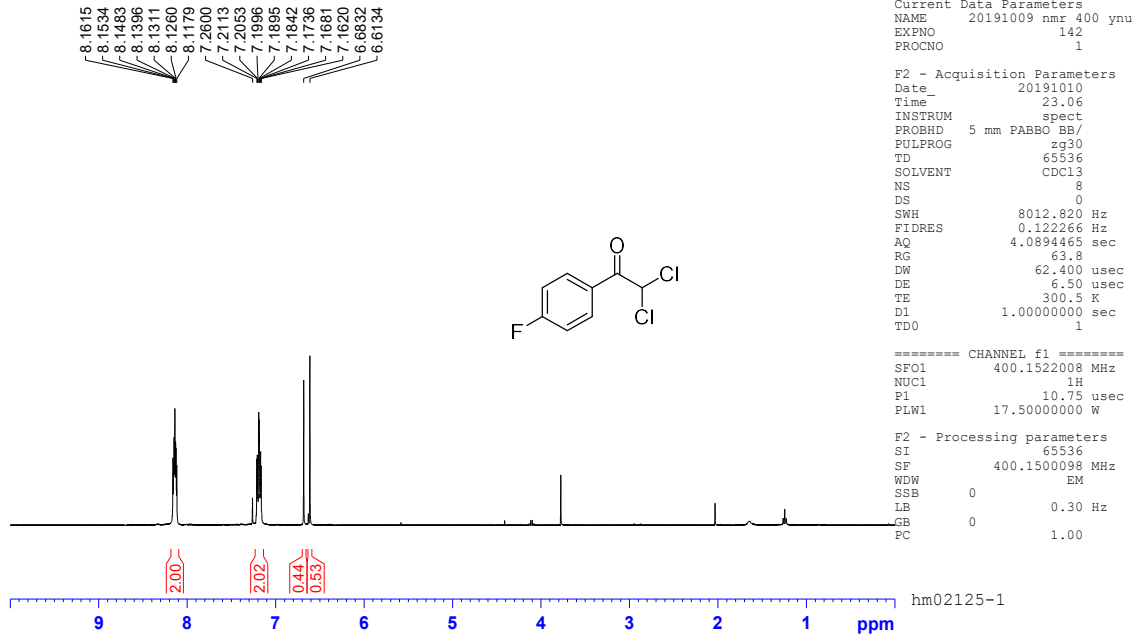

# <sup>13</sup>C-NMR (100 MHz, CDCl<sub>3</sub>)

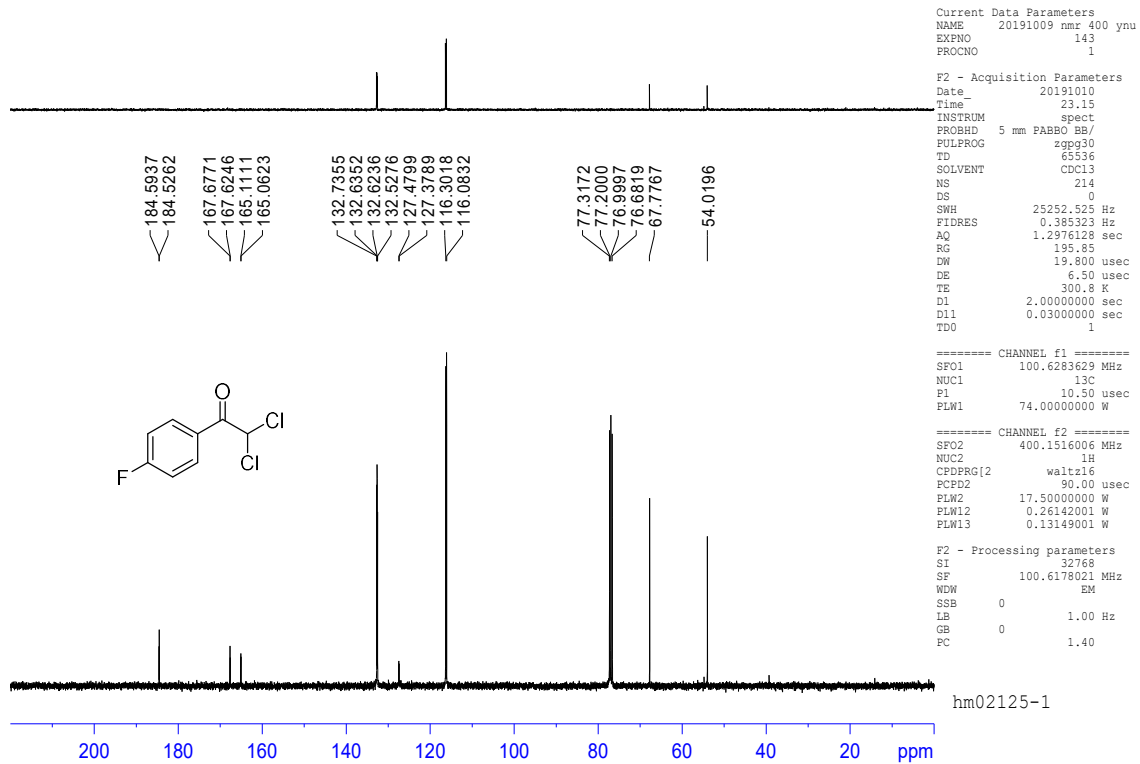

# <sup>1</sup>H-NMR (400 MHz, CDCl<sub>3</sub>)

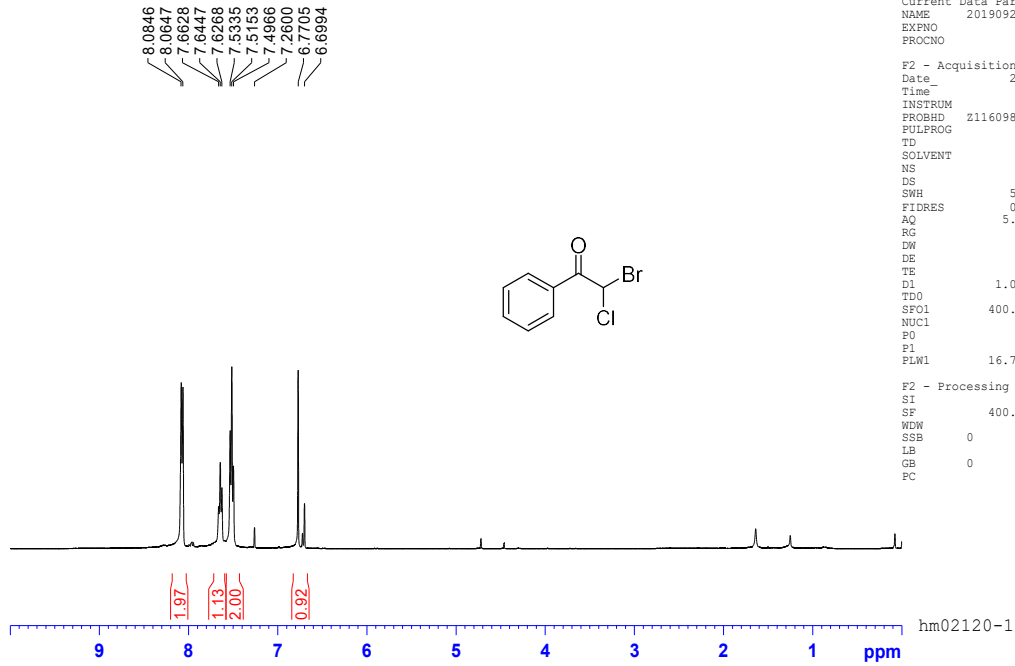

# <sup>13</sup>C-NMR (100 MHz, CDCl<sub>3</sub>)

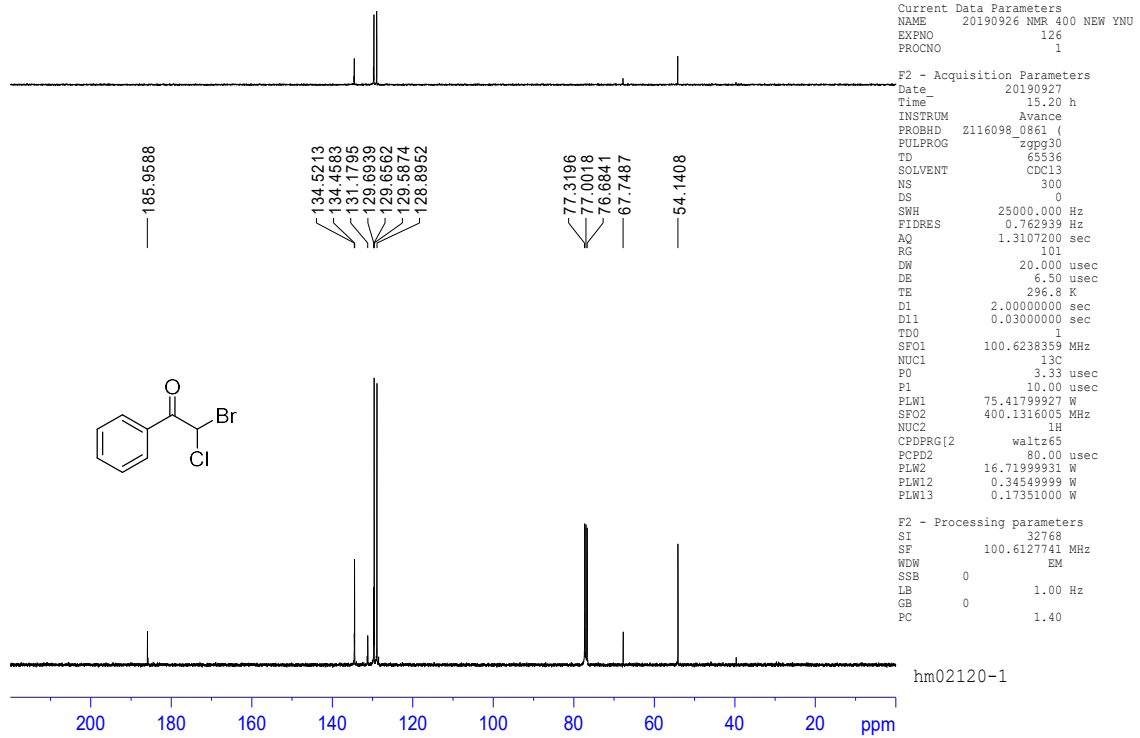

<sup>1</sup>H-NMR (400 MHz, CDCl<sub>3</sub>)

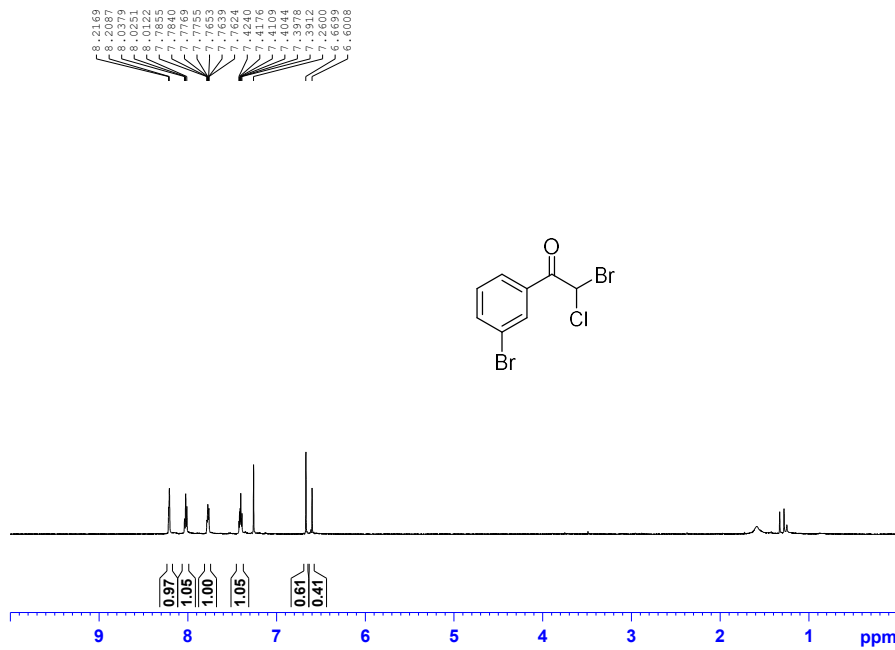

Current Data Parameters  
 NAME 20200109 nmr 400 ynu (HR)  
 EXPNO 10  
 PROCNO 1

F2 - Acquisition Parameters  
 Date\_ 20200109  
 Time 9.13 h  
 PROBHD z114607\_0222 (f  
 TD 65536  
 SOLVENT CDCl3  
 NS 2  
 DS 2  
 RG 121.23  
 DI 1.00000000 sec  
 DS 2  
 NS 2  
 TDO 1  
 SFO1 600.1737060 MHz  
 NUC1 1H  
 P1 10.00 usec  
 PLW1 26.09399986 W

F2 - Processing parameters  
 SI 65536  
 SF 600.1700161 MHz  
 WDW EM  
 SSB 0  
 LB 0.30 Hz  
 GB 0  
 FC 1.00

HM02212

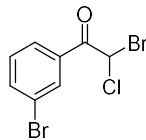

<sup>13</sup>C-NMR (150 MHz, CDCl<sub>3</sub>)

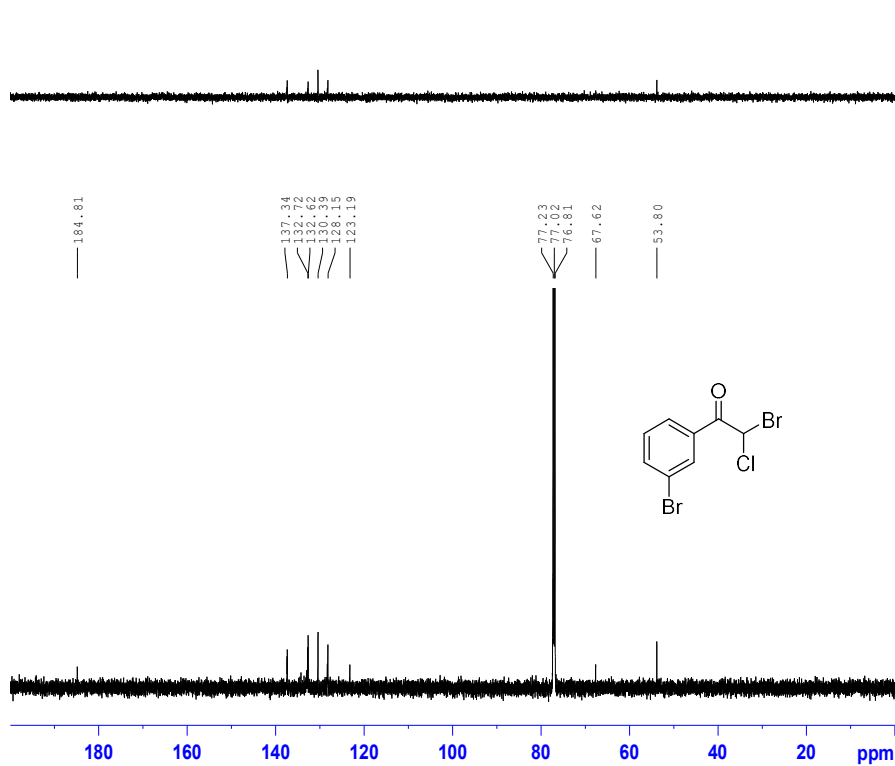

Current Data Parameters  
 NAME 20200109-2 nmr 600 ynu (rh)  
 EXPNO 61  
 PROCNO 1

F2 - Acquisition Parameters  
 Date\_ 20200109  
 Time 13.25 h  
 PROBHD z114607\_0222 (f  
 TD 65536  
 SOLVENT CDCl3  
 NS 256  
 DS 4  
 RG 188.35  
 DI 2.00000000 sec  
 DI1 0.03000000 sec  
 DS 4  
 NS 256  
 TDO 1  
 SFO1 150.9279578 MHz  
 NUC1 13C  
 P1 12.00 usec  
 PLW1 97.67099762 W  
 SFO2 600.1724007 MHz  
 NUC2 1H  
 CPDPRG2 waltz16  
 PCD2 80.00 usec  
 PLW2 26.09399986 W  
 PLW12 0.40399119 W  
 PLW13 0.20248041 W

F2 - Processing parameters  
 SI 32768  
 SF 150.9128660 MHz  
 WDW EM  
 SSB 0  
 LB 1.00 Hz  
 GB 0  
 FC 1.40

HM02212

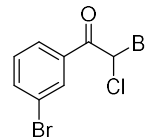

# <sup>1</sup>H-NMR (400 MHz, CDCl<sub>3</sub>)

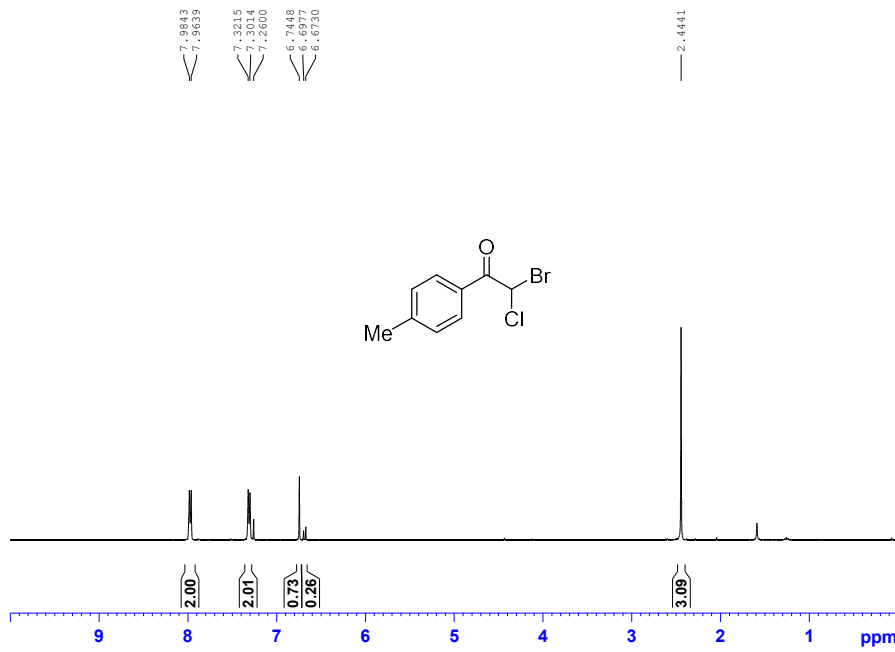

Current Data Parameters  
NAME 20191124 nmr 400 ynu new  
EXPNO 313  
PROCNO 1

F2 - Acquisition Parameters  
Date\_ 20191126  
Time 0.29 h  
INSTRUM Avance  
PROBHD z116098\_0861 (4  
PULPROG zg30  
TD 65536  
SOLVENT CDCl3  
NS 8  
DS 0  
SWH 5555.556 Hz  
FIDRES 0.169542 Hz  
AQ 5.8982401 sec  
RG 101  
DW 90.000 usec  
DE 9.42 usec  
TE 295.2 K  
D1 1.0000000 sec  
TDO 1  
SFO1 400.1321847 MHz  
NUC1 1H  
P0 3.58 usec  
P1 10.75 usec  
PLW1 16.71999931 W

F2 - Processing parameters  
SI 65536  
SF 400.1300105 MHz  
WDW EM  
SSB 0  
LB 0.30 Hz  
GB 0  
PC 1.00

HM02171-1

# <sup>13</sup>C-NMR (100 MHz, CDCl<sub>3</sub>)

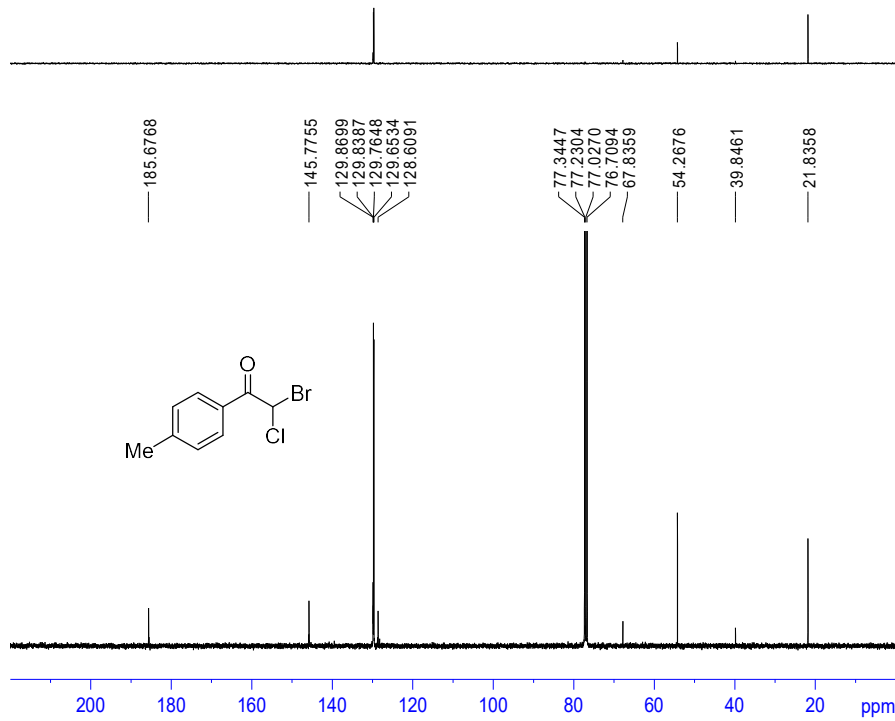

Current Data Parameters  
NAME 20191124 nmr 400 ynu new  
EXPNO 314  
PROCNO 1

F2 - Acquisition Parameters  
Date\_ 20191126  
Time 0.59 h  
INSTRUM Avance  
PROBHD z116098\_0861 (4  
PULPROG zgpg30  
TD 65536  
SOLVENT CDCl3  
NS 512  
DS 0  
SWH 25000.000 Hz  
FIDRES 0.762939 Hz  
AQ 1.3107200 sec  
RG 101  
DW 20.000 usec  
DE 6.50 usec  
TE 296.5 K  
D1 2.0000000 sec  
D11 0.03000000 sec  
TDO 1  
SFO1 100.6238359 MHz  
NUC1 13C  
P0 3.33 usec  
P1 10.00 usec  
PLW1 75.41799927 W  
SFO2 400.1316005 MHz  
NUC2 1H  
CPDPRG[2] waltz65  
PCPD2 80.00 usec  
PLW2 16.71999931 W  
PLW12 0.37619999 W  
PLW13 0.18892001 W

F2 - Processing parameters  
SI 32768  
SF 100.6127685 MHz  
WDW EM  
SSB 0  
LB 1.00 Hz  
GB 0  
PC 1.40

HM02171-1

# <sup>1</sup>H-NMR (400 MHz, CDCl<sub>3</sub>)

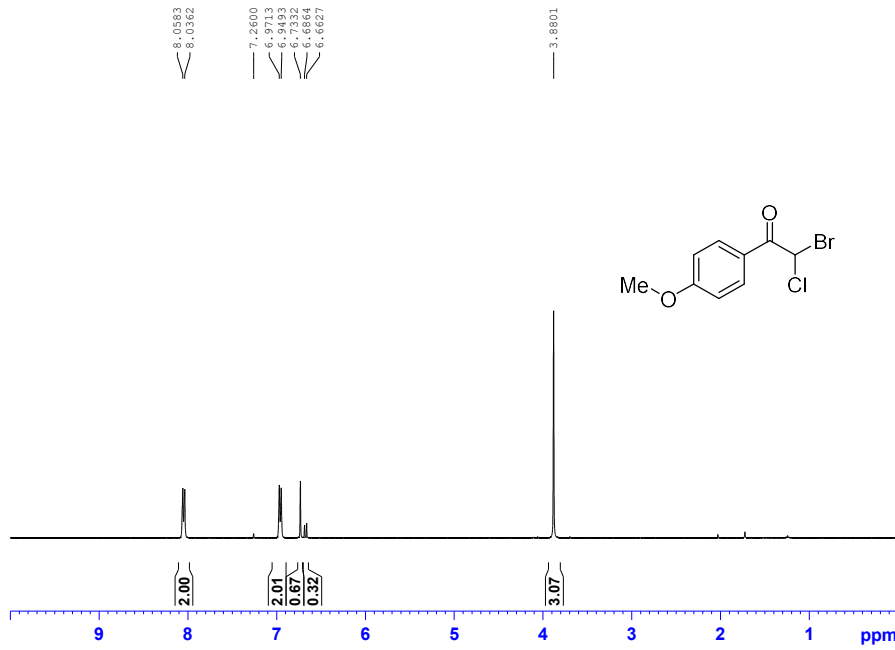

Current Data Parameters  
NAME 20191124 nmr 400 ynu old  
EXPNO 304  
PROCNO 1

F2 - Acquisition Parameters  
Date\_ 20191125  
Time 22.24  
INSTRUM spect  
PROBHD 5 mm PABBO BB/  
PULPROG zg30  
TD 65536  
SOLVENT CDCl3  
NS 8  
DS 0  
SWH 8012.820 Hz  
FIDRES 0.122266 Hz  
AQ 4.0894465 sec  
RG 31.56  
DW 62.400 usec  
DE 6.50 usec  
TE 299.7 K  
D1 1.00000000 sec  
TDO 1

===== CHANNEL f1 =====  
SFO1 400.1522008 MHz  
NUC1 1H  
P1 10.75 usec  
PLW1 17.50000000 W

F2 - Processing parameters  
SI 65536  
SF 400.1500097 MHz  
WDW EM  
SSB 0  
LB 0.30 Hz  
GB 0  
PC 1.00

hm02172-1

# <sup>13</sup>C-NMR (100 MHz, CDCl<sub>3</sub>)

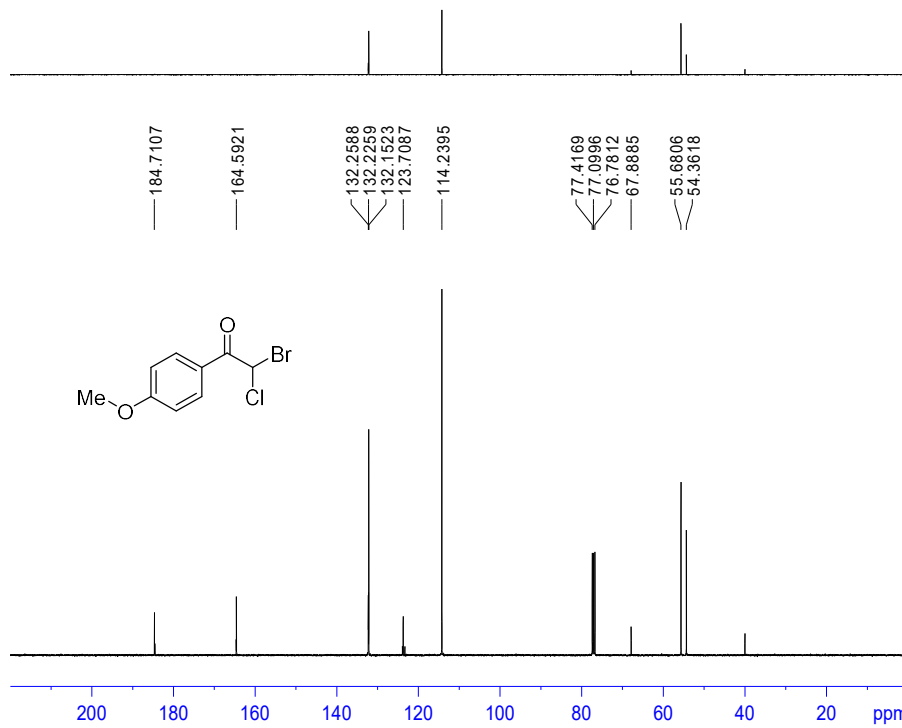

Current Data Parameters  
NAME 20191124 nmr 400 ynu old  
EXPNO 305  
PROCNO 1

F2 - Acquisition Parameters  
Date\_ 20191125  
Time 22.35  
INSTRUM spect  
PROBHD 5 mm PABBO BB/  
PULPROG zgpg30  
TD 65536  
SOLVENT CDCl3  
NS 245  
DS 0  
SWH 25252.525 Hz  
FIDRES 0.385323 Hz  
AQ 1.2976128 sec  
RG 195.85  
DW 19.800 usec  
DE 6.50 usec  
TE 300.0 K  
D1 2.00000000 sec  
D11 0.03000000 sec  
TDO 1

===== CHANNEL f1 =====  
SFO1 100.6283629 MHz  
NUC1 13C  
P1 10.50 usec  
PLW1 74.00000000 W

===== CHANNEL f2 =====  
SFO2 400.1516006 MHz  
NUC2 1H  
CFDPRG[2] waltz16  
PCPD2 90.00 usec  
PLN2 17.50000000 W  
PLW12 0.26142001 W  
PLW13 0.13149001 W

F2 - Processing parameters  
SI 32768  
SF 100.6177980 MHz  
WDW EM  
SSB 0  
LB 1.00 Hz  
GB 0  
PC 1.40

hm02172-1



# <sup>1</sup>H-NMR (400 MHz, CDCl<sub>3</sub>)

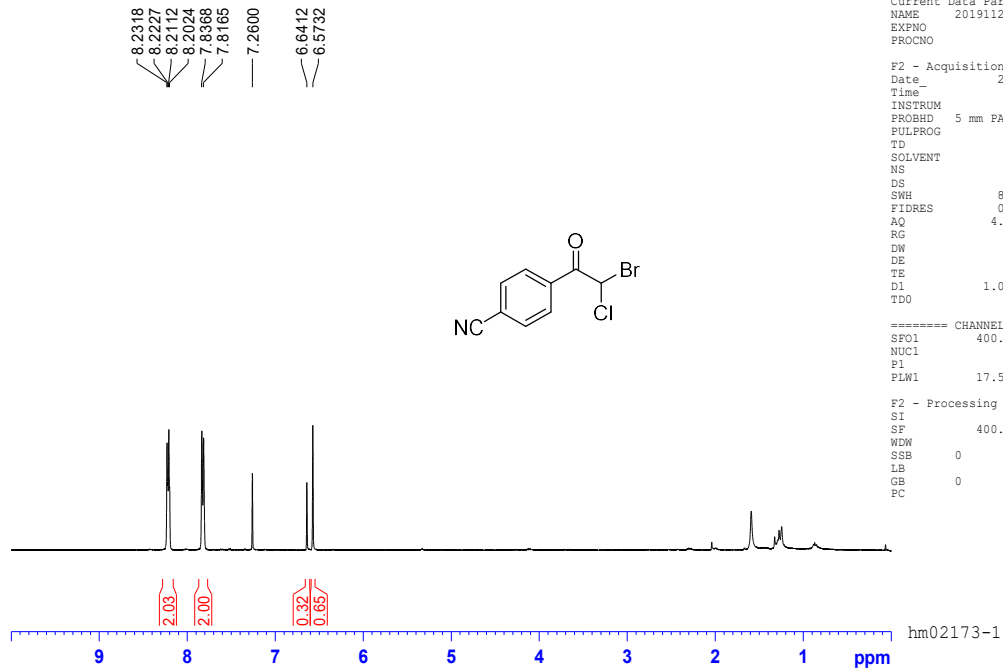

# <sup>13</sup>C-NMR (100 MHz, CDCl<sub>3</sub>)

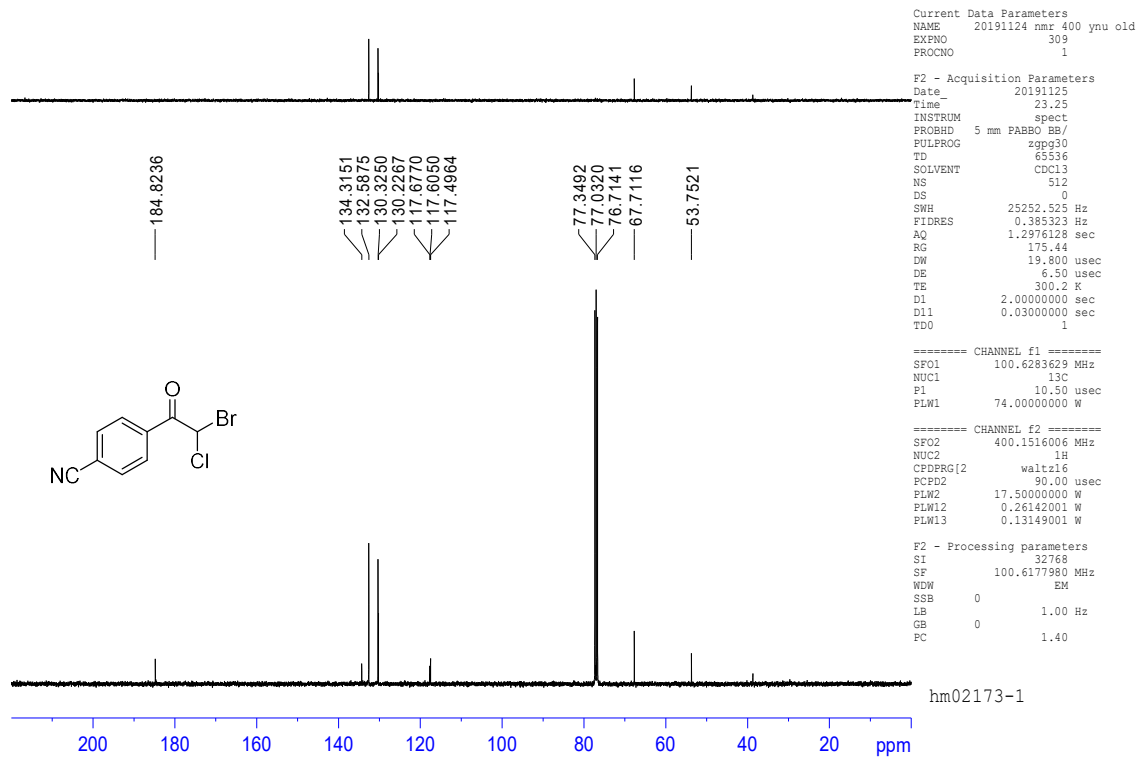

# <sup>1</sup>H-NMR (400 MHz, CDCl<sub>3</sub>)

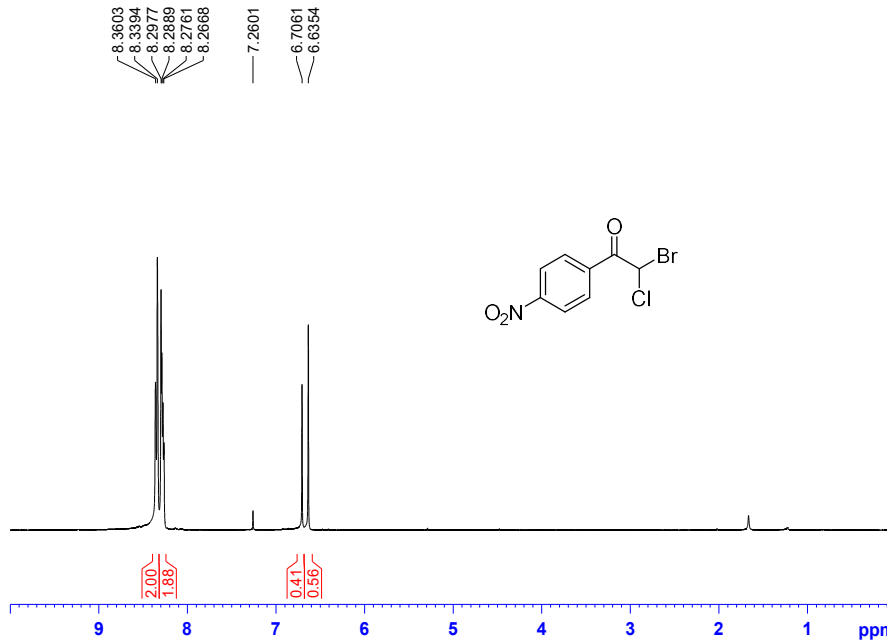

Current Data Parameters  
NAME 20191117 nmr 400 ynu new  
EXPNO 269  
PROCNO 1

F2 - Acquisition Parameters  
Date\_ 20191118  
Time\_ 12.15 h  
INSTRUM Avance  
PROBHD Z116098\_0861 (  
PULPROG zg30  
TD 65536  
SOLVENT cdcl3  
NS 8  
DS 0  
SWH 5555.556 Hz  
FIDRES 0.169542 Hz  
AQ 5.8982401 sec  
RG 100.241  
DW 90.000 usec  
DE 9.42 usec  
TE 295.3 K  
D1 1.00000000 sec  
TDO 1  
SFO1 400.1321847 MHz  
NUC1 1H  
FO 3.58 usec  
PI 10.75 usec  
PLW1 16.7199931 W

F2 - Processing parameters  
SI 65536  
SF 400.1300096 MHz  
WDW EM  
SSB 0  
LB 0.30 Hz  
GB 0  
PC 1.00

# <sup>13</sup>C-NMR (100 MHz, CDCl<sub>3</sub>)

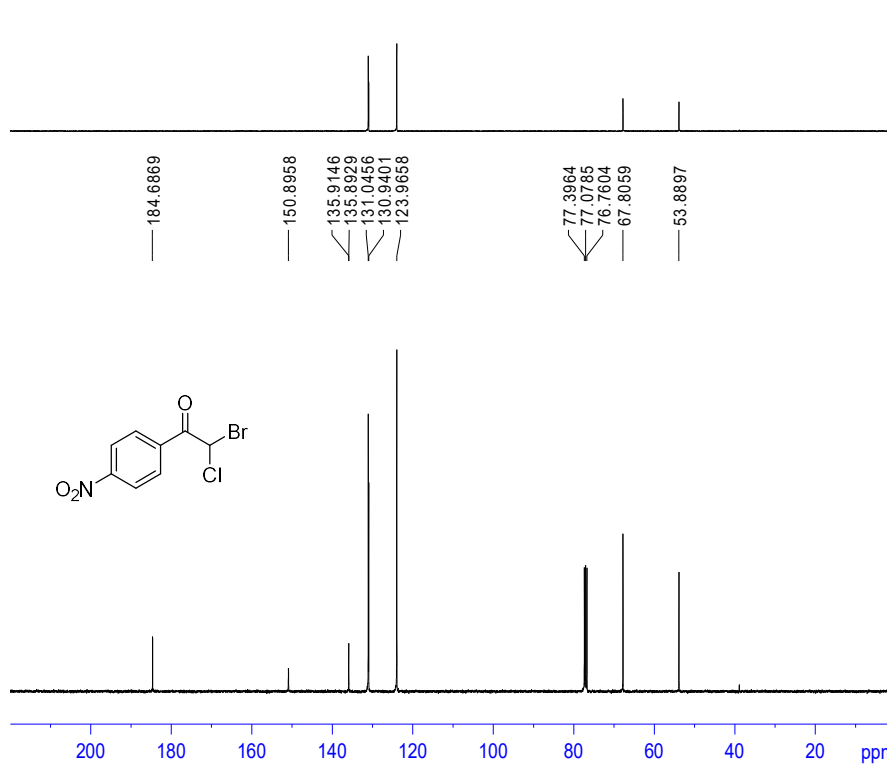

Current Data Parameters  
NAME 20191117 nmr 400 ynu new  
EXPNO 270  
PROCNO 1

F2 - Acquisition Parameters  
Date\_ 20191118  
Time\_ 12.34 h  
INSTRUM Avance  
PROBHD Z116098\_0861 (  
PULPROG zgpg30  
TD 65536  
SOLVENT cdcl3  
NS 316  
DS 0  
SWH 25000.000 Hz  
FIDRES 0.762939 Hz  
AQ 1.3107200 sec  
RG 101  
DW 20.000 usec  
DE 6.50 usec  
TE 295.7 K  
D1 2.00000000 sec  
D11 0.03000000 sec  
TDO 1  
SFO1 100.6238359 MHz  
NUC1 13C  
FO 3.33 usec  
PI 10.00 usec  
PLW1 75.4179927 W  
SFO2 400.1316005 MHz  
NUC2 1H  
CPDPRG[2] waltz65  
PCPD2 80.00 usec  
PLW2 16.7199931 W  
PLW12 0.37619999 W  
PLW13 0.18892001 W

F2 - Processing parameters  
SI 32768  
SF 100.6127685 MHz  
WDW EM  
SSB 0  
LB 1.00 Hz  
GB 0  
PC 1.40

# <sup>1</sup>H-NMR (400 MHz, CDCl<sub>3</sub>)

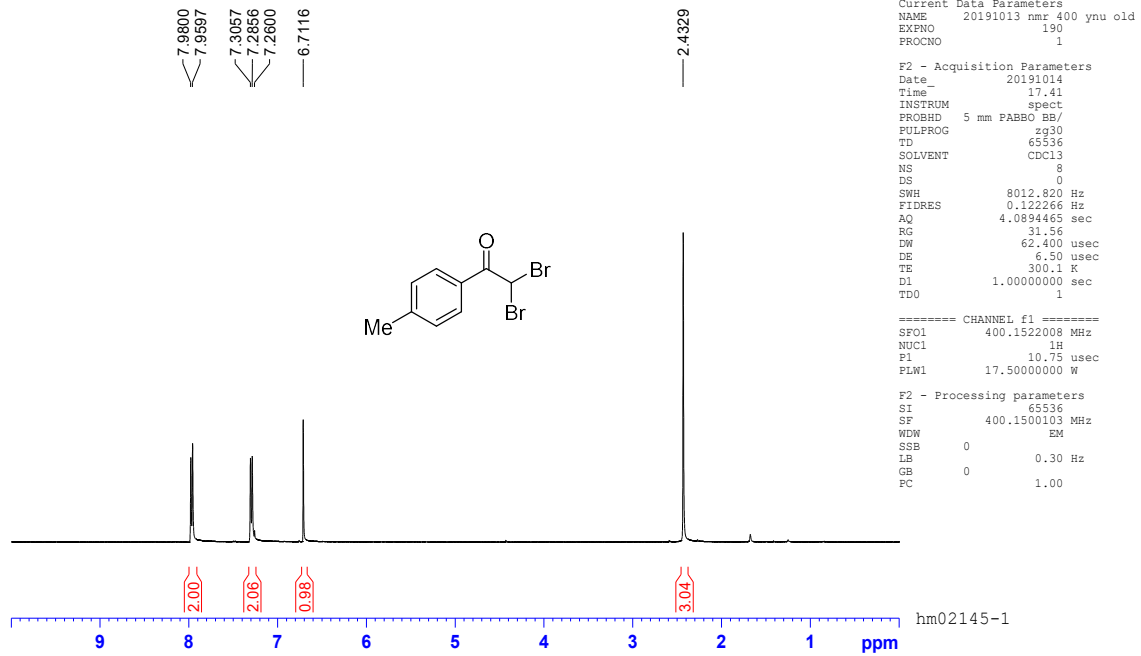

# <sup>13</sup>C-NMR (100 MHz, CDCl<sub>3</sub>)

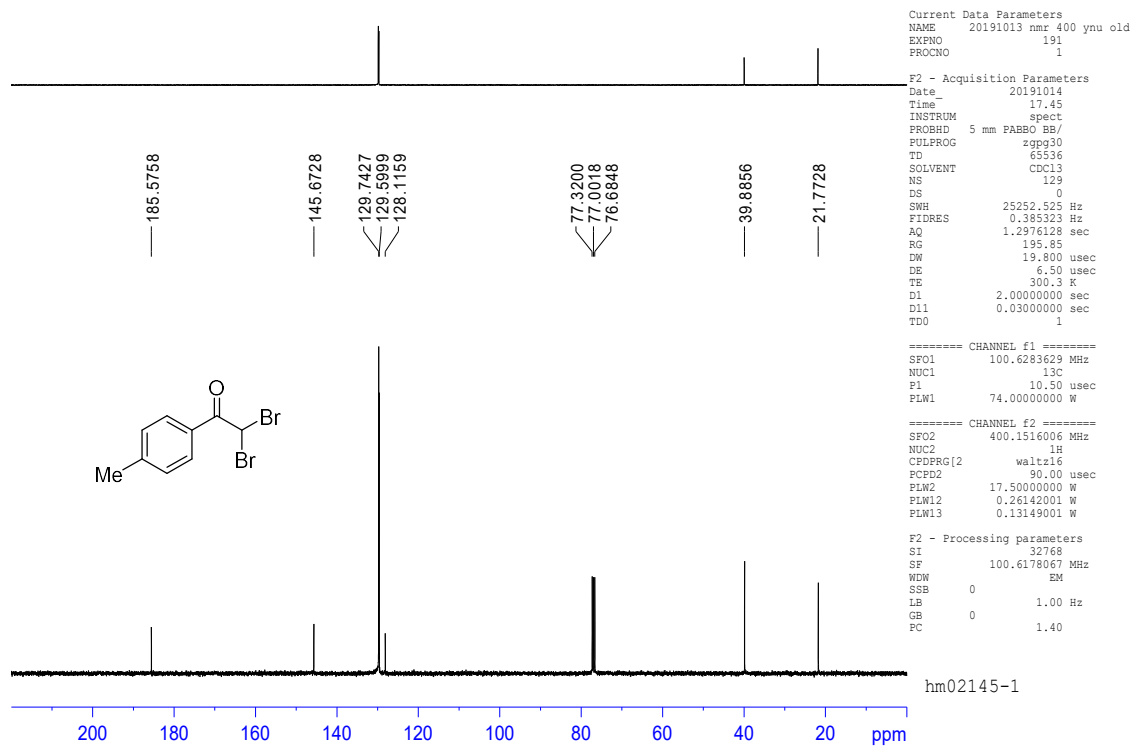

<sup>1</sup>H-NMR (300 MHz, CDCl<sub>3</sub>)

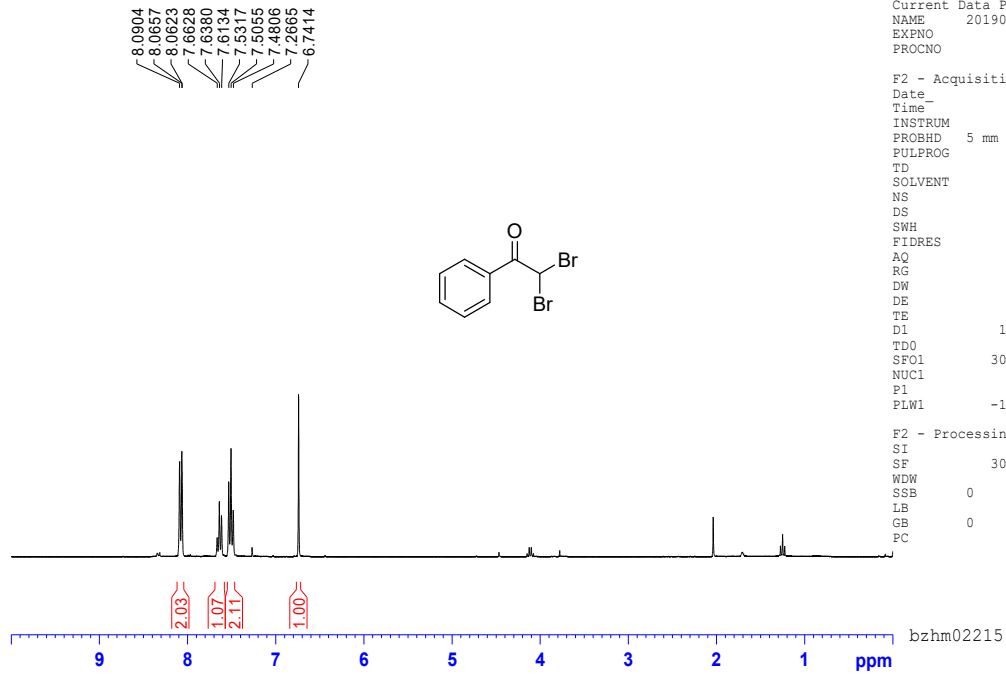

Current Data Parameters  
NAME 20190918 nmr 300 ynu  
EXPNO 1109  
PROCNO 1

F2 - Acquisition Parameters  
Date\_ 20190919  
Time 0.08  
INSTRUM av300  
PROBHD 5 mm QNP 1H/13  
PULPROG zg30  
TD 65536  
SOLVENT CDCl3  
NS 8  
DS 0  
SWH 6172.839 Hz  
FIDRES 0.094190 Hz  
AQ 5.3084159 sec  
RG 181  
DW 81.000 usec  
DE 6.50 usec  
TE 300.0 K  
D1 1.00000000 sec  
TDO 1  
SFO1 300.1318534 MHz  
NUC1 1H  
P1 8.25 usec  
PLW1 -1.00000000 W

F2 - Processing parameters  
SI 32768  
SF 300.1300101 MHz  
WDW EM  
SSB 0  
LB 0.30 Hz  
GB 0  
PC 1.00

<sup>13</sup>C-NMR (75 MHz, CDCl<sub>3</sub>)

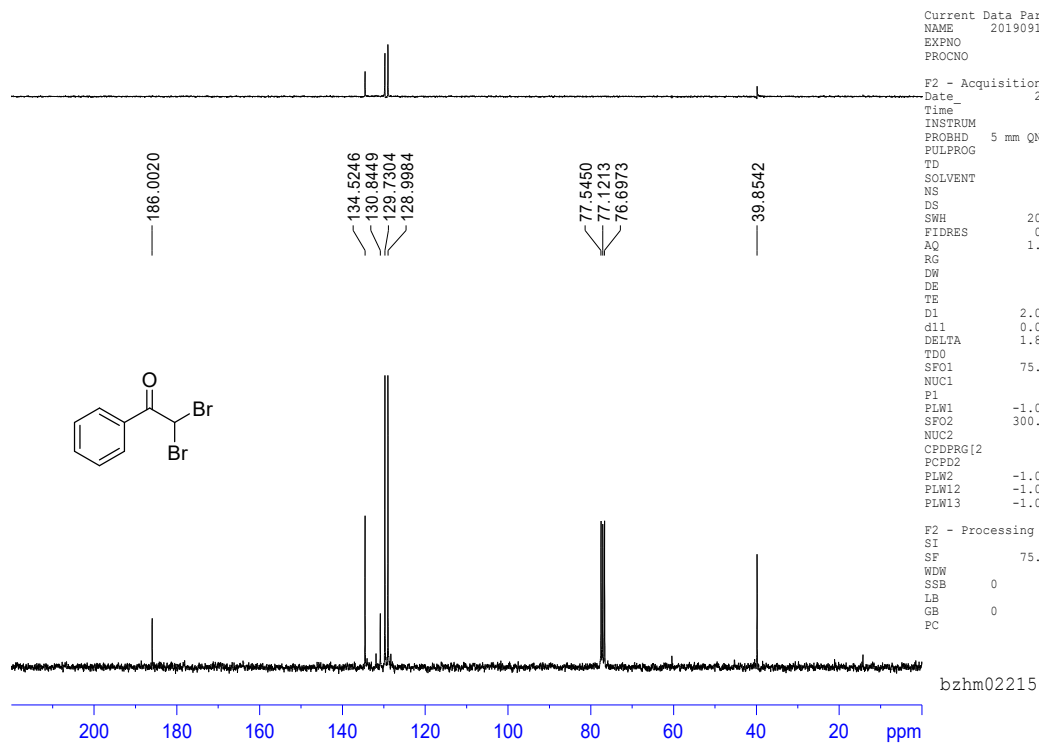

Current Data Parameters  
NAME 20190918 nmr 300 ynu  
EXPNO 1113  
PROCNO 1

F2 - Acquisition Parameters  
Date\_ 20190919  
Time 0.36  
INSTRUM av300  
PROBHD 5 mm QNP 1H/13  
PULPROG zgpg30  
TD 65536  
SOLVENT CDCl3  
NS 103  
DS 0  
SWH 20325.203 Hz  
FIDRES 0.310138 Hz  
AQ 1.6121856 sec  
RG 16384  
DW 24.600 usec  
DE 6.50 usec  
TE 300.0 K  
D1 2.00000000 sec  
d11 0.03000000 sec  
DELTA 1.89999998 sec  
TDO 1  
SFO1 75.4752953 MHz  
NUC1 13C  
P1 28.00 usec  
PLW1 -1.00000000 W  
SFO2 300.1312005 MHz  
NUC2 1H  
CPDPRG2 waltz16  
PCPD2 80.00 usec  
PLW2 -1.00000000 W  
PLW3 -1.00000000 W  
PLW13 -1.00000000 W

F2 - Processing parameters  
SI 32768  
SF 75.4677490 MHz  
WDW EM  
SSB 0  
LB 3.00 Hz  
GB 0  
PC 1.40

<sup>1</sup>H-NMR (400 MHz, CDCl<sub>3</sub>)

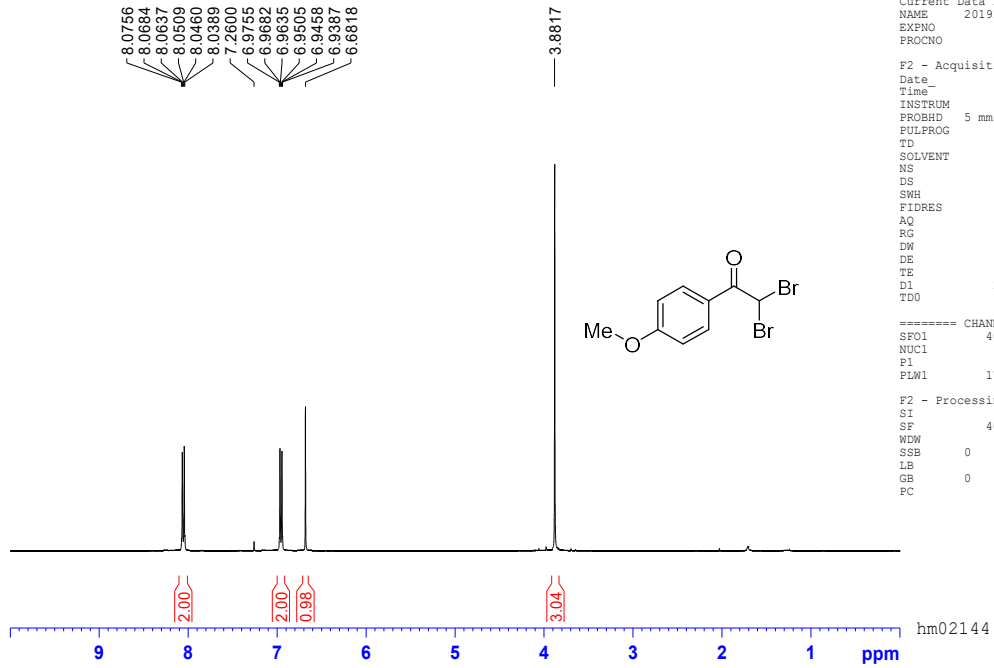

<sup>13</sup>C-NMR (100 MHz, CDCl<sub>3</sub>)

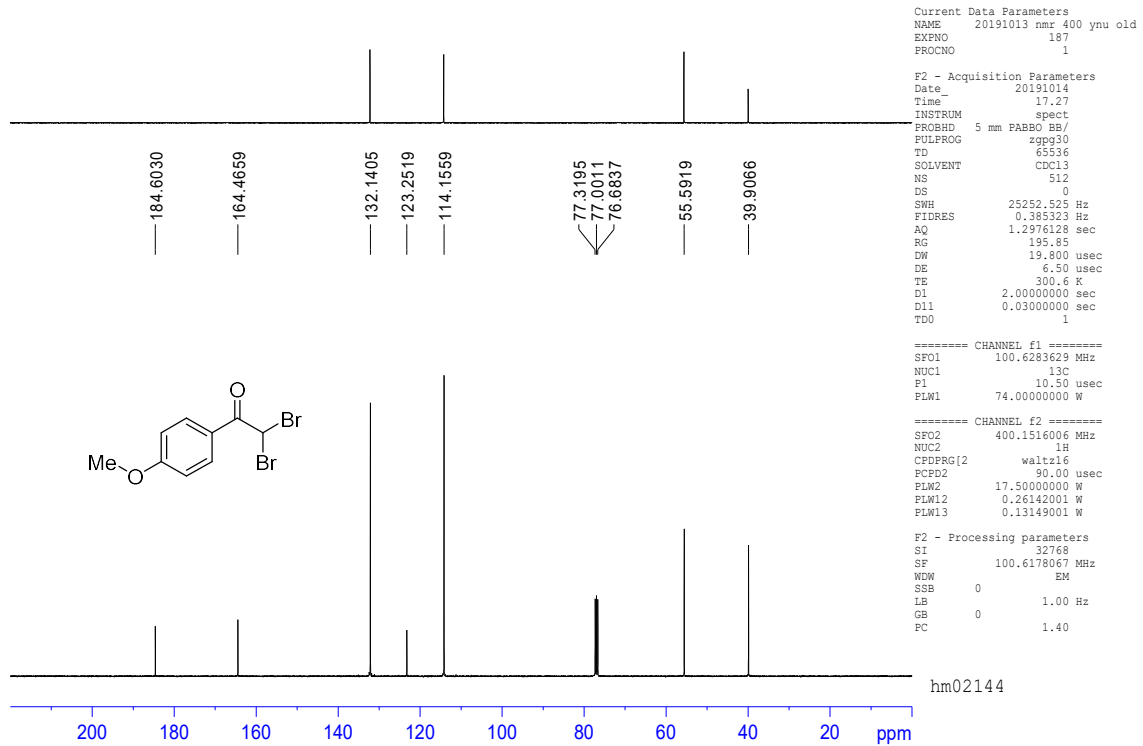

# <sup>1</sup>H-NMR (400 MHz, CDCl<sub>3</sub>)

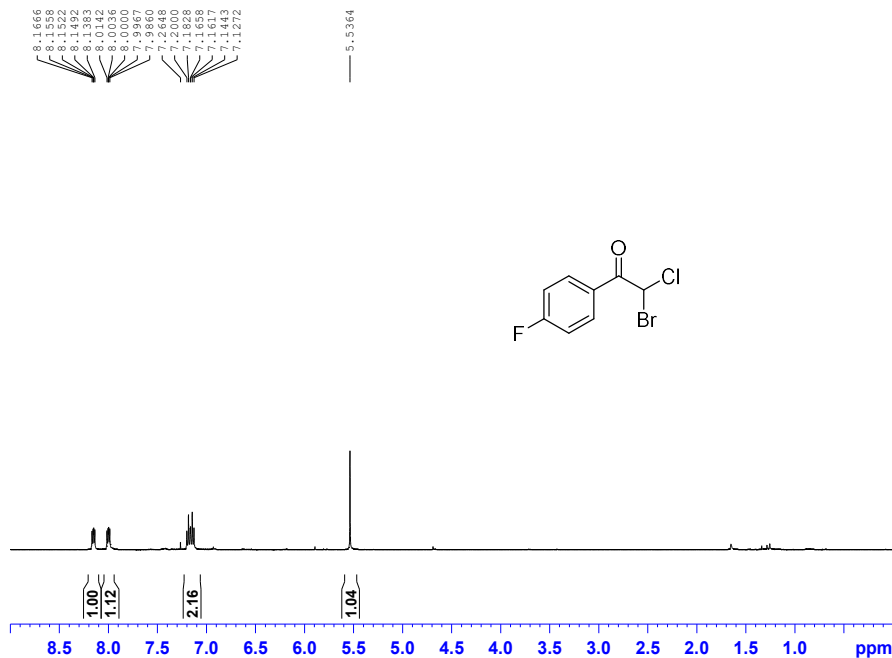

Current Data Parameters  
NAME 20210820 nmr h  
EXPNO 90  
PROCNO 1

F2 - Acquisition Parameters  
Date\_ 20210820  
Time 11.14 h  
INSTRUM spect  
PROBHD z113652\_0230 ( )  
PULPROG zg30  
TD 65536  
SOLVENT CDCl3  
NS 3  
DS 2  
SWH 10000.000 Hz  
FIDRES 0.305176 Hz  
AQ 3.2767999 sec  
RG 86.69  
DW 50.000 usec  
DE 6.50 usec  
TE 296.5 K  
D1 1.00000000 sec  
TDO 1  
SFO1 500.130883 MHz  
NUC1 1H  
P1 9.60 usec  
PLW1 22.00000000 W

F2 - Processing parameters  
SI 65536  
SF 500.1300095 MHz  
WDW EM  
SSB 0  
LB 0.30 Hz  
GB 0  
PC 1.00

HM02123-2

# <sup>13</sup>C-NMR (100 MHz, CDCl<sub>3</sub>)

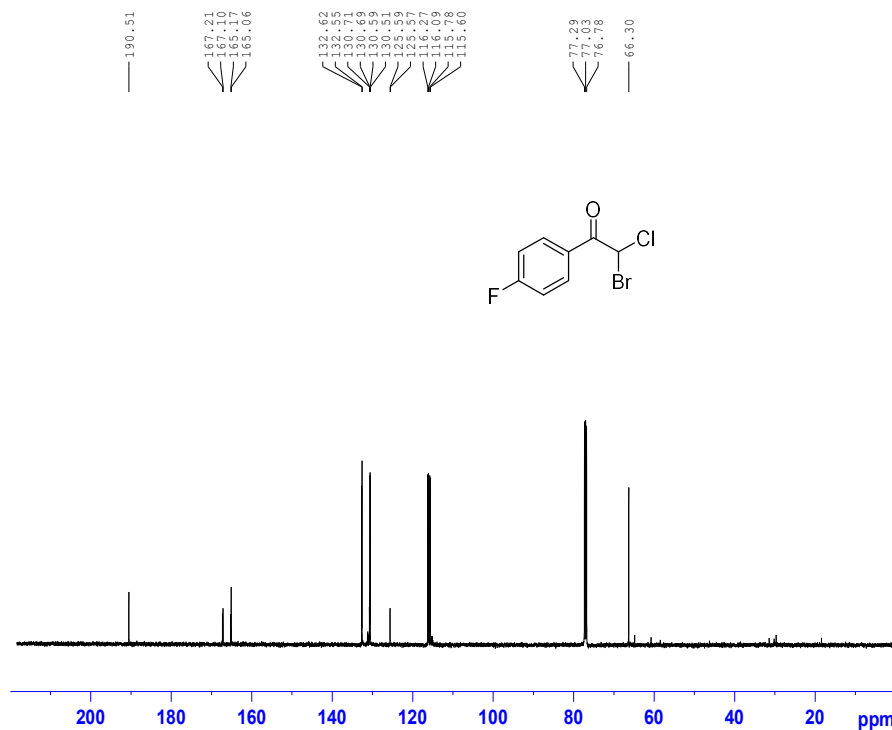

Current Data Parameters  
NAME 20210820 nmr c  
EXPNO 92  
PROCNO 1

F2 - Acquisition Parameters  
Date\_ 20210820  
Time 23.08 h  
INSTRUM spect  
PROBHD z113652\_0230 ( )  
PULPROG zgpg30  
TD 65536  
SOLVENT CDCl3  
NS 350  
DS 4  
SWH 29761.904 Hz  
FIDRES 0.908261 Hz  
AQ 1.1010048 sec  
RG 190.79  
DW 16.800 usec  
DE 6.50 usec  
TE 298.0 K  
D1 2.00000000 sec  
D11 0.03000000 sec  
TDO 1  
SFO1 125.7703643 MHz  
NUC1 13C  
P1 12.00 usec  
PLW1 90.00000000 W  
SFO2 500.1320005 MHz  
NUC2 1H  
CPDPRG[2] waltz16  
PCPD2 80.00 usec  
PLW2 22.00000000 W  
PLW12 0.34720001 W  
PLW13 0.17464000 W

F2 - Processing parameters  
SI 32768  
SF 125.7577885 MHz  
WDW EM  
SSB 0  
LB 1.00 Hz  
GB 0  
PC 1.40

HM02123-2

# <sup>1</sup>H-NMR (400 MHz, CDCl<sub>3</sub>)

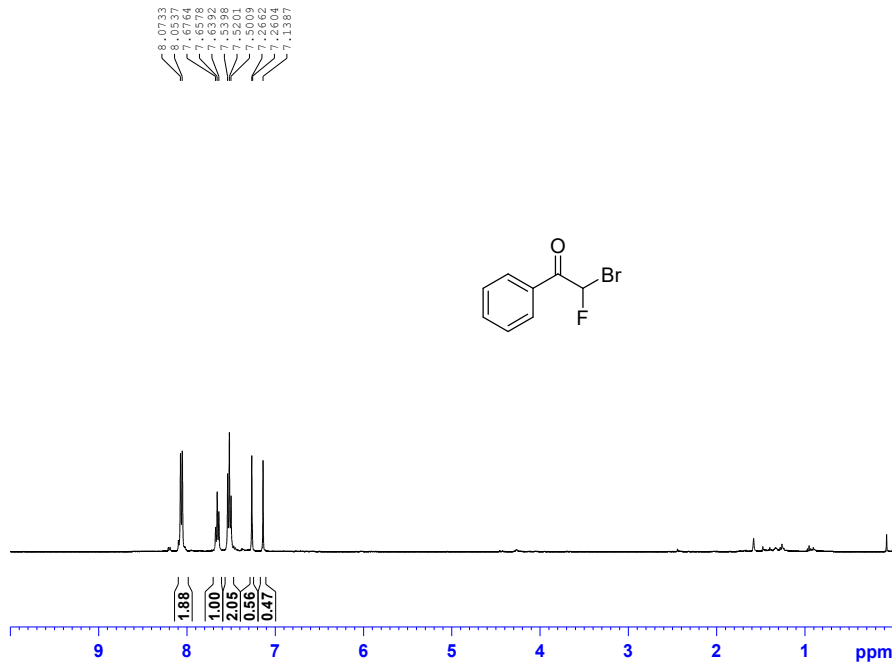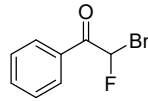

Current Data Parameters  
NAME tyf04072-1  
EXPNO 1  
PROCNO 1

F2 - Acquisition Parameters  
Date\_ 20220126  
Time 22.16  
INSTRUM spect  
PROBHD 5 mm QNP 1H/15  
PULPROG zg  
TD 65536  
SOLVENT CDCl3  
NS 4  
DS 2  
SWH 8012.820 Hz  
FIDRES 0.122266 Hz  
AQ 4.0894465 sec  
RG 120.71  
DW 62.400 usec  
DE 6.50 usec  
TE 297.6 K  
D1 2.0000000 sec  
TDO 1

==== CHANNEL f1 =====  
SFO1 400.1318812 MHz  
NUC1 1H  
P1 16.50 usec  
PLW1 8.30000019 W

F2 - Processing parameters  
SI 65536  
SF 400.1300097 MHz  
WDW EM  
SSB 0  
LB 1.00 Hz  
GB 0  
PC 1.00  
tyf04072-1

# <sup>13</sup>C-NMR (100 MHz, CDCl<sub>3</sub>)

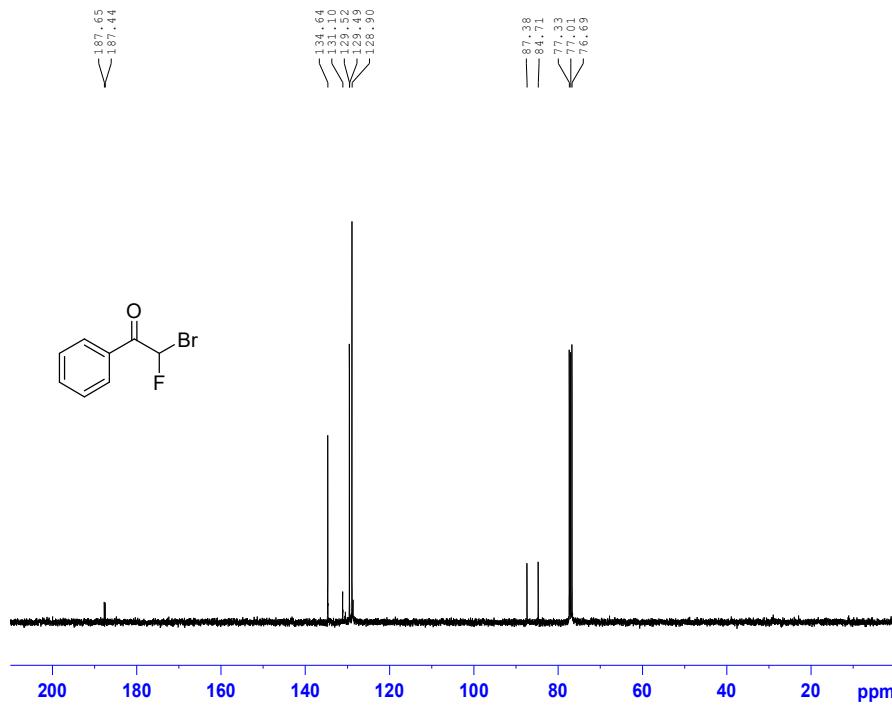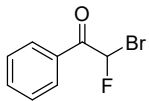

Current Data Parameters  
NAME tyf04072-1  
EXPNO 2  
PROCNO 1

F2 - Acquisition Parameters  
Date\_ 20220126  
Time 22.18  
INSTRUM spect  
PROBHD 5 mm QNP 1H/15  
PULPROG zgdc  
TD 65536  
SOLVENT CDCl3  
NS 255  
DS 4  
SWH 24038.461 Hz  
FIDRES 0.366798 Hz  
AQ 1.3631488 sec  
RG 214.83  
DW 20.800 usec  
DE 6.50 usec  
TE 298.4 K  
D1 3.0000000 sec  
D11 0.03000000 sec  
TDO 1

==== CHANNEL f1 =====  
SFO1 100.6241382 MHz  
NUC1 13C  
P1 10.00 usec  
PLW1 45.97900009 W

==== CHANNEL f2 =====  
SFO2 400.1316005 MHz  
NUC2 1H  
CPDPRG2 waltr16  
PCPD2 80.00 usec  
PLW2 2.08929992 W  
PLW12 0.39991000 W

F2 - Processing parameters  
SI 32768  
SF 100.6127690 MHz  
WDW EM  
SSB 0  
LB 1.00 Hz  
GB 0  
PC 1.40  
tyf04072-1

<sup>19</sup>F NMR (376 MHz, CDCl<sub>3</sub>)

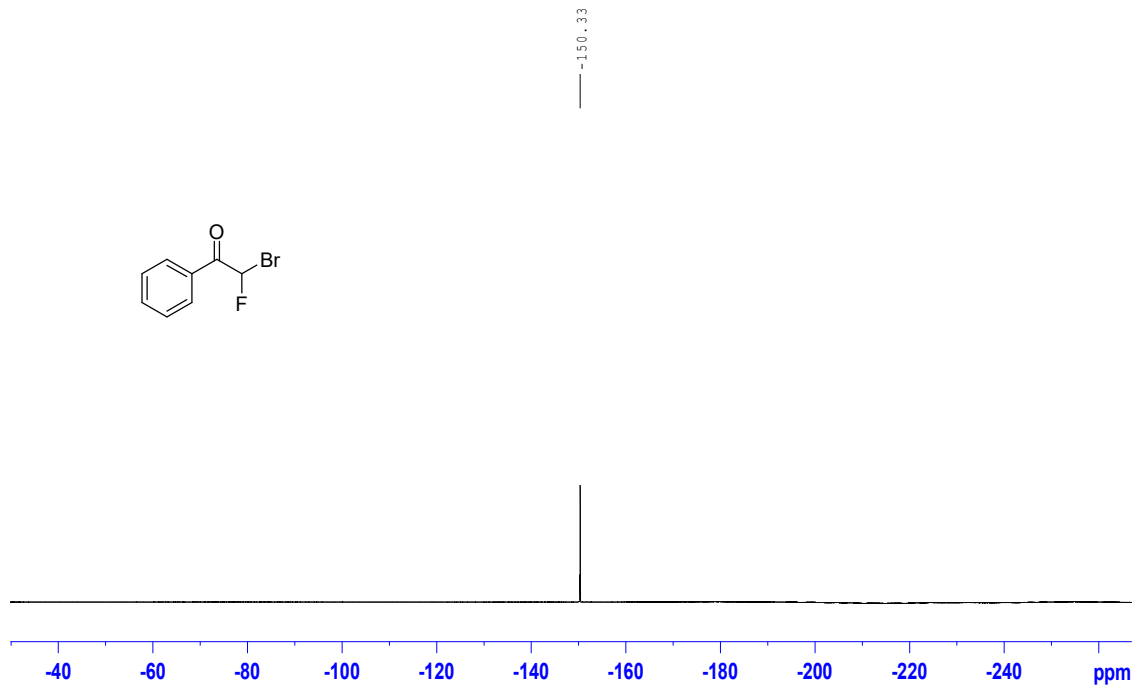

<sup>1</sup>H-NMR (400 MHz, CDCl<sub>3</sub>)

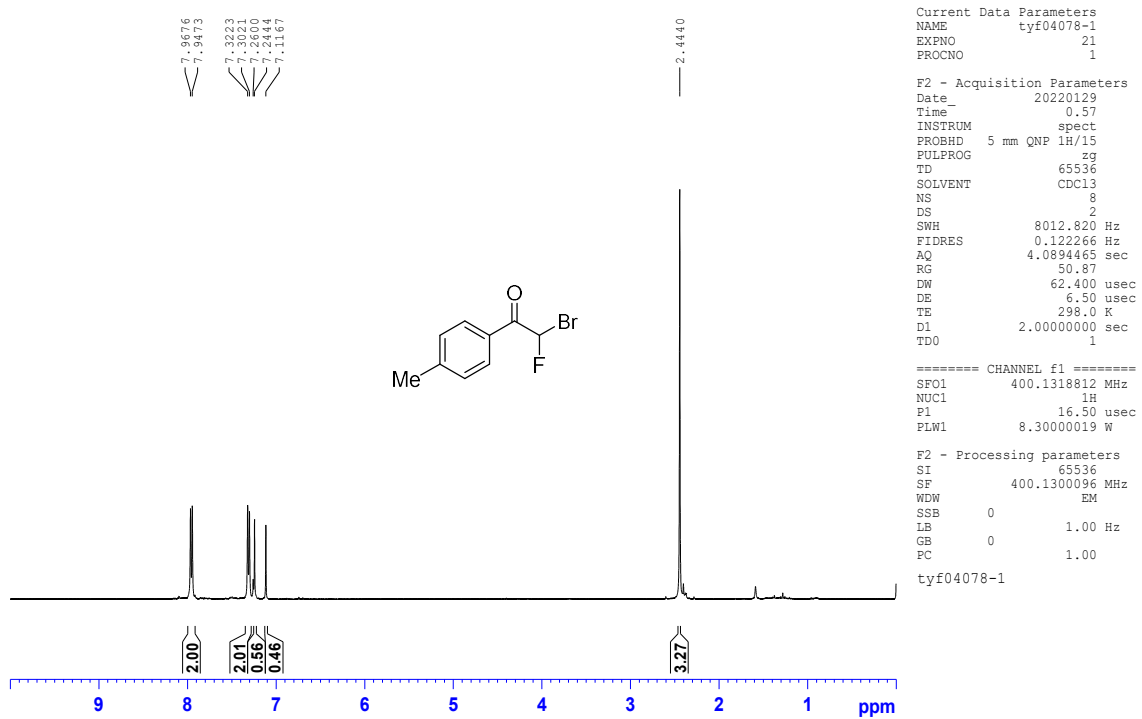



<sup>13</sup>C-NMR (100 MHz, CDCl<sub>3</sub>)

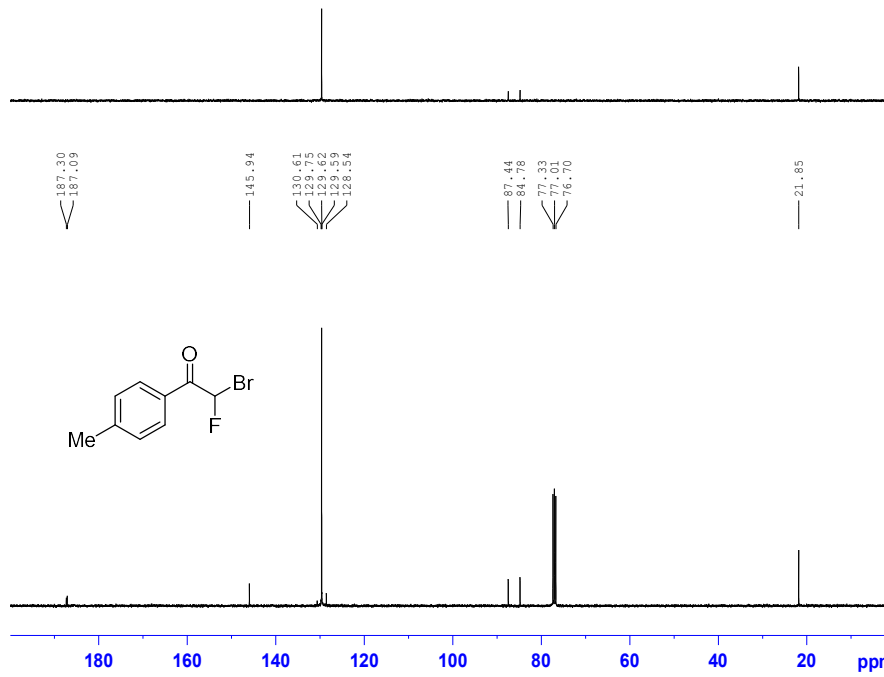

Current Data Parameters  
NAME tyf04078-1  
EXPNO 22  
PROCNO 1

F2 - Acquisition Parameters  
Date\_ 20220129  
Time\_ 0.59  
INSTRUM spect  
PROBHD 5 mm QNP 1H/15  
PULPROG zgdc  
TD 65536  
SOLVENT CDCl3  
NS 280  
DS 4  
SWH 24038.461 Hz  
FIDRES 0.366798 Hz  
AQ 1.3631488 sec  
RG 214.83  
DW 20.800 usec  
DE 6.50 usec  
TE 299.0 K  
D1 3.0000000 sec  
D11 0.0300000 sec  
TD0 1

===== CHANNEL f1 =====  
SFO1 100.6241382 MHz  
NUC1 13C  
P1 10.00 usec  
PLW1 45.97900009 W

===== CHANNEL f2 =====  
SFO2 400.1316005 MHz  
NUC2 1H  
CPDPRG2 waltz16  
PCPD2 80.00 usec  
PLW2 2.08929992 W  
PLW12 0.39991000 W

F2 - Processing parameters  
SI 32768  
SF 100.6127690 MHz  
WDW EM  
SSB 0  
LB 1.00 Hz  
GB 0  
PC 1.40

tyf04078-1

<sup>19</sup>F NMR (376 MHz, CDCl<sub>3</sub>)

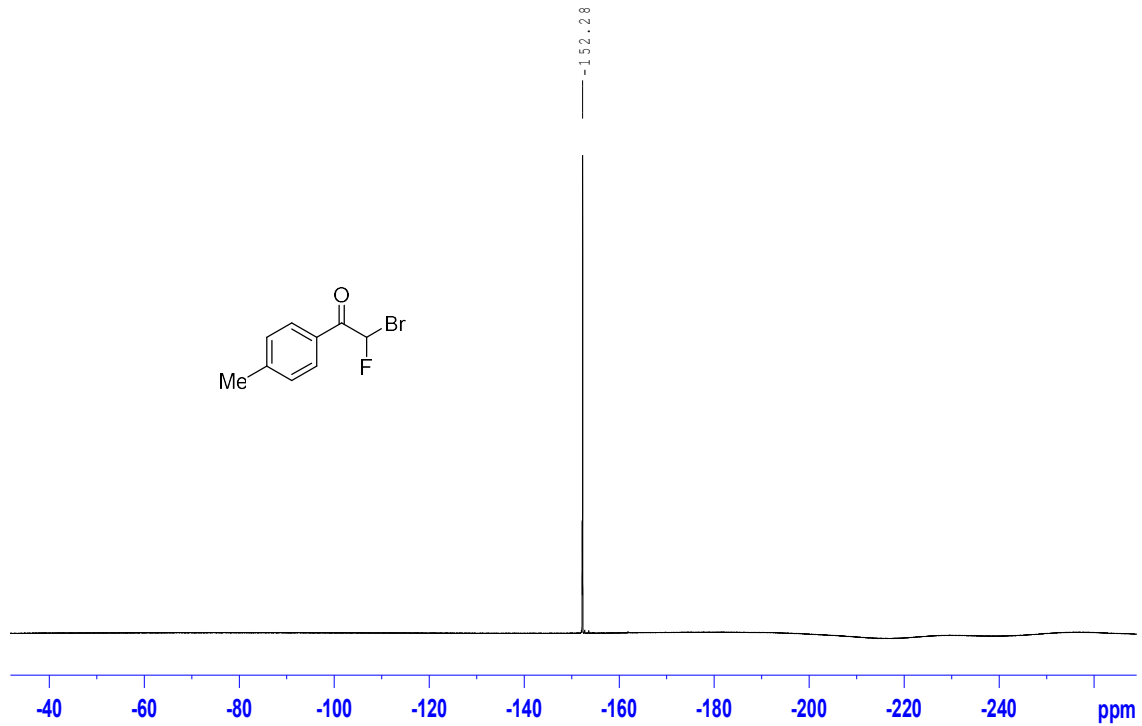

# <sup>1</sup>H-NMR (600 MHz, CDCl<sub>3</sub>)

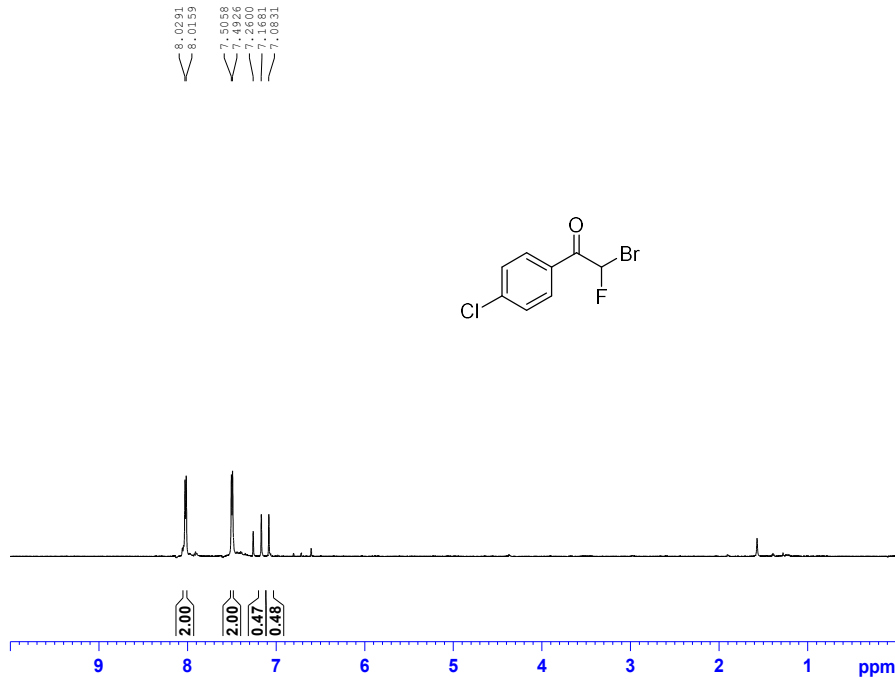

Current Data Parameters  
NAME 20220212 nmr h c 2d  
EXPNO 10  
PROCNO 1

F2 - Acquisition Parameters  
Date\_ 20220212  
Time\_ 16.53 h  
INSTRUM spect  
PROBHD Z114607\_0222 (  
PULPROG zg30  
TD 65536  
SOLVENT CDCl3  
NS 2  
DS 2  
SWH 12019.230 Hz  
FIDRES 0.366798 Hz  
AQ 2.7262976 sec  
RG 121.23  
DW 41.600 usec  
DE 11.27 usec  
TE 291.5 K  
D1 1.00000000 sec  
TD0 1  
SFO1 600.1737060 MHz  
NUC1 1H  
FO 3.33 usec  
P1 10.00 usec  
PLW1 26.09399986 W

F2 - Processing parameters  
SI 65536  
SF 600.1700163 MHz  
WDW EM  
SSB 0  
LB 0.30 Hz  
GB 0  
PC 1.00  
TYF04076-1

# <sup>13</sup>C-NMR (150 MHz, CDCl<sub>3</sub>)

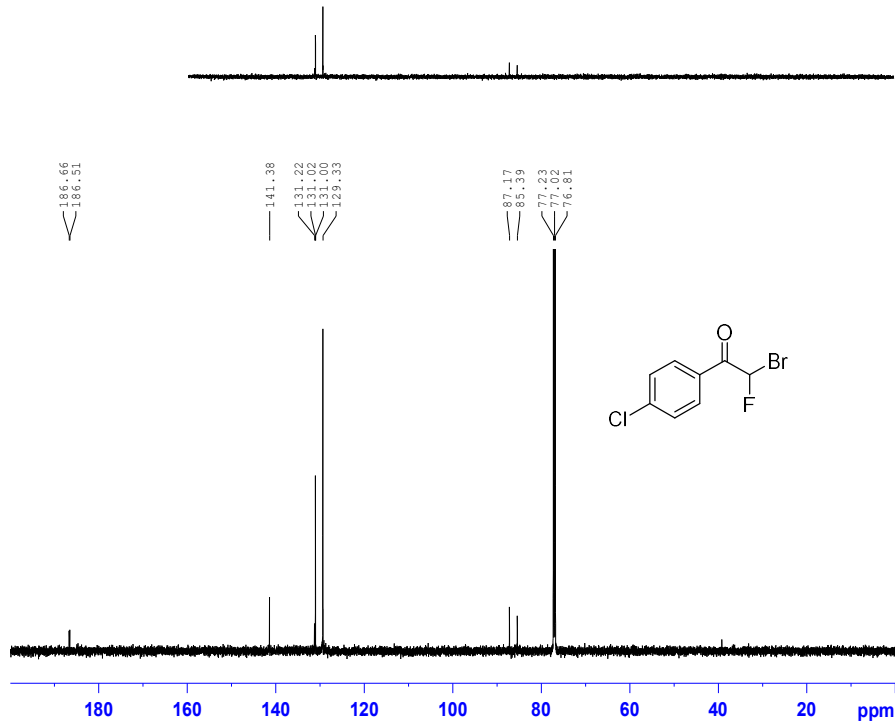

Current Data Parameters  
NAME 20220212 nmr h c 2d  
EXPNO 11  
PROCNO 1

F2 - Acquisition Parameters  
Date\_ 20220212  
Time\_ 17.08 h  
INSTRUM spect  
PROBHD Z114607\_0222 (  
PULPROG zgpg30  
TD 65536  
SOLVENT CDCl3  
NS 285  
DS 4  
SWH 36231.883 Hz  
FIDRES 1.105709 Hz  
AQ 0.9043968 sec  
RG 188.35  
DW 13.800 usec  
DE 6.50 usec  
TE 292.8 K  
D1 2.00000000 sec  
D11 0.03000000 sec  
TD0 1  
SFO1 150.9279578 MHz  
NUC1 13C  
P1 4.00 usec  
P1 12.00 usec  
PLW1 97.67099762 W  
SFO2 600.1724007 MHz  
NUC2 1H  
CPDPRG2 waltz65  
PCPD2 70.00 usec  
PLW2 27.73900032 W  
PLW12 0.56610000 W  
PLW13 0.28475001 W

F2 - Processing parameters  
SI 32768  
SF 150.9128665 MHz  
WDW EM  
SSB 0  
LB 1.00 Hz  
GB 0  
PC 1.40  
TYF04076-1

<sup>19</sup>F NMR (376 MHz, CDCl<sub>3</sub>)

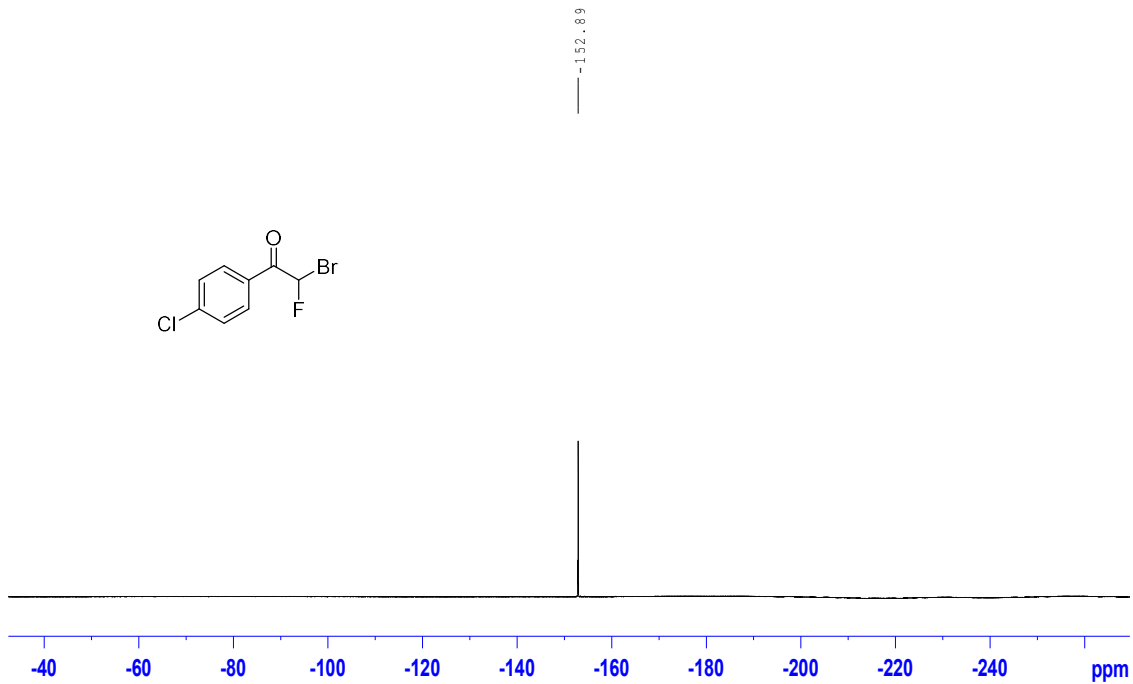

<sup>1</sup>H-NMR (400 MHz, CDCl<sub>3</sub>)

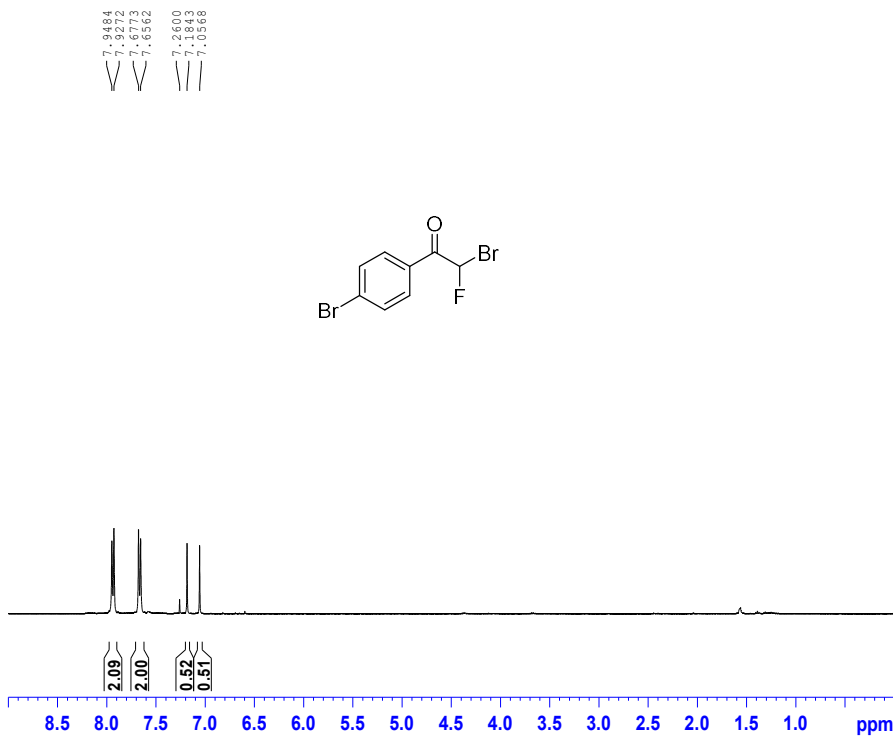

Current Data Parameters  
NAME tyf04083-3  
EXPNO 6  
PROCNO 1

F2 - Acquisition Parameters  
Date\_ 20220228  
Time 0.08  
INSTRUM spect  
PROBHD 5 mm QNP 1H/15  
PULPROG zg  
TD 65536  
SOLVENT CDCl3  
NS 4  
DS 2  
SWH 8012.820 Hz  
FIDRES 0.122266 Hz  
AQ 4.0894465 sec  
RG 159.21  
DW 62.400 usec  
DE 6.50 usec  
TE 297.8 K  
D1 2.0000000 sec  
TDO 1

===== CHANNEL f1 =====  
SFO1 400.1318812 MHz  
NUC1 1H  
P1 16.50 usec  
PLW1 8.30000019 W

F2 - Processing parameters  
SI 65536  
SF 400.1300102 MHz  
WDW EM  
SSB 0  
LB 1.00 Hz  
GB 0  
PC 1.00  
tyf04083-3  
PROTON CDCl3

<sup>13</sup>C-NMR (100 MHz, CDCl<sub>3</sub>)

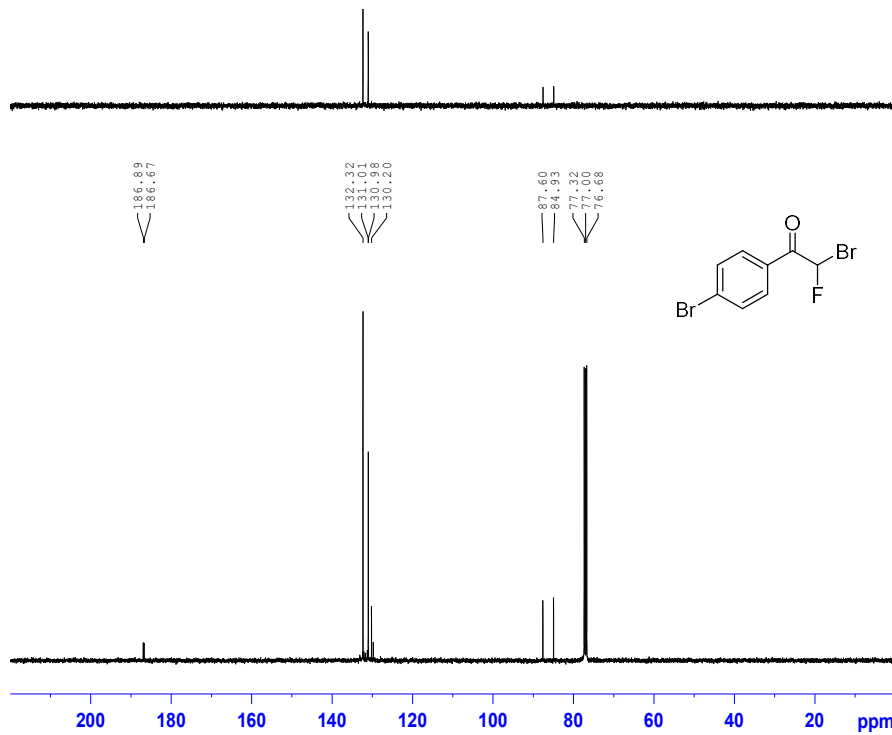

Current Data Parameters  
NAME tyf04083-3  
EXPNO 8  
PROCNO 1

F2 - Acquisition Parameters  
Date\_ 20220228  
Time 0.22  
INSTRUM spect  
PROBHD 5 mm QNP 1H/15  
PULPROG zgdc  
TD 65536  
SOLVENT CDCl3  
NS 700  
DS 4  
SWH 24038.461 Hz  
FIDRES 0.366798 Hz  
AQ 1.3631488 sec  
RG 214.83  
DW 20.800 usec  
DE 6.50 usec  
TE 299.9 K  
D1 3.00000000 sec  
D11 0.03000000 sec  
TD0 1

==== CHANNEL f1 =====  
SFO1 100.6241382 MHz  
NUC1 13C  
P1 10.00 usec  
PLW1 45.97900009 W

==== CHANNEL f2 =====  
SFO2 400.1316005 MHz  
NUC2 1H  
CPDPRG[2] waltz16  
PCPD2 80.00 usec  
PLW2 2.08929992 W  
PLW12 0.39991000 W

F2 - Processing parameters  
SI 32768  
SF 100.6127690 MHz  
WDW EM  
SSB 0  
LB 1.00 Hz  
GB 0  
PC 1.40

tyf04083-3

<sup>19</sup>F NMR (376 MHz, CDCl<sub>3</sub>)

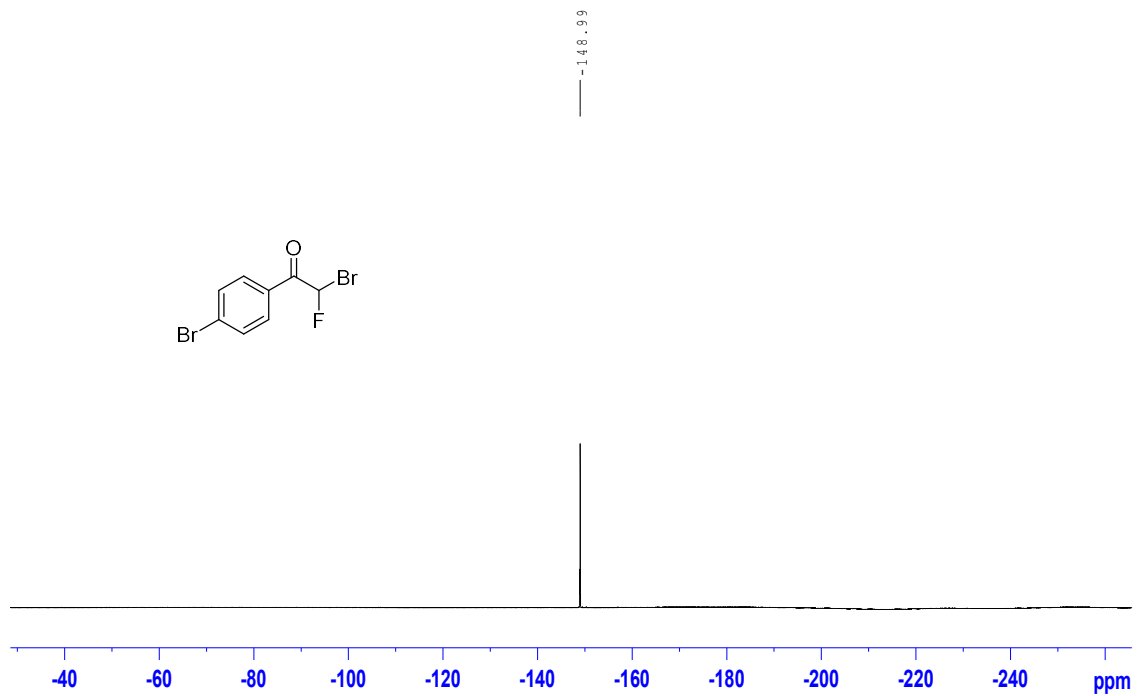

<sup>1</sup>H-NMR (600 MHz, CDCl<sub>3</sub>)

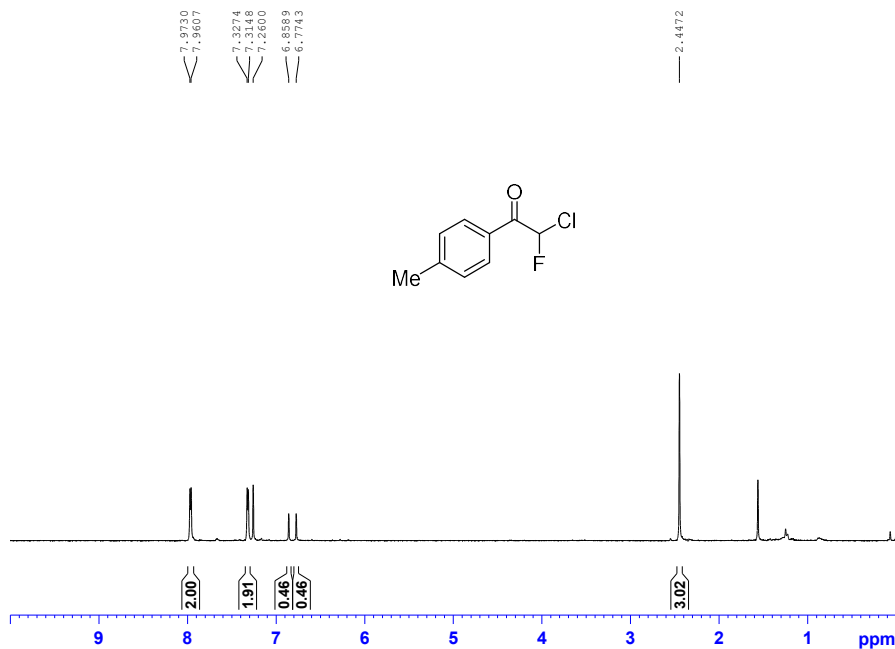

Current Data Parameters  
 NAME 20220228 nmr ynu  
 EXPNO 20  
 PROCNO 1

F2 - Acquisition Parameters  
 Date 20220228  
 Time 10.50 h  
 INSTRUM spect  
 PROBHD Z114607\_0222 (  
 PULPROG zg30  
 TD 65536  
 SOLVENT CDCl3  
 NS 3  
 DS 2  
 SWH 12019.230 Hz  
 FIDRES 0.366798 Hz  
 AQ 2.7262976 sec  
 RG 188.35  
 DW 41.600 usec  
 DE 11.27 usec  
 TE 290.6 K  
 D1 1.00000000 sec  
 TD0 1  
 SFO1 600.1737060 MHz  
 NUC1 1H  
 PO 3.33 usec  
 P1 10.00 usec  
 PLW1 26.09399986 W

F2 - Processing parameters  
 SI 65536  
 SF 600.1700169 MHz  
 WDW EM  
 SSB 0  
 LB 0.30 Hz  
 GB 0  
 PC 1.00  
 tyf04084-1

<sup>13</sup>C-NMR (150 MHz, CDCl<sub>3</sub>)

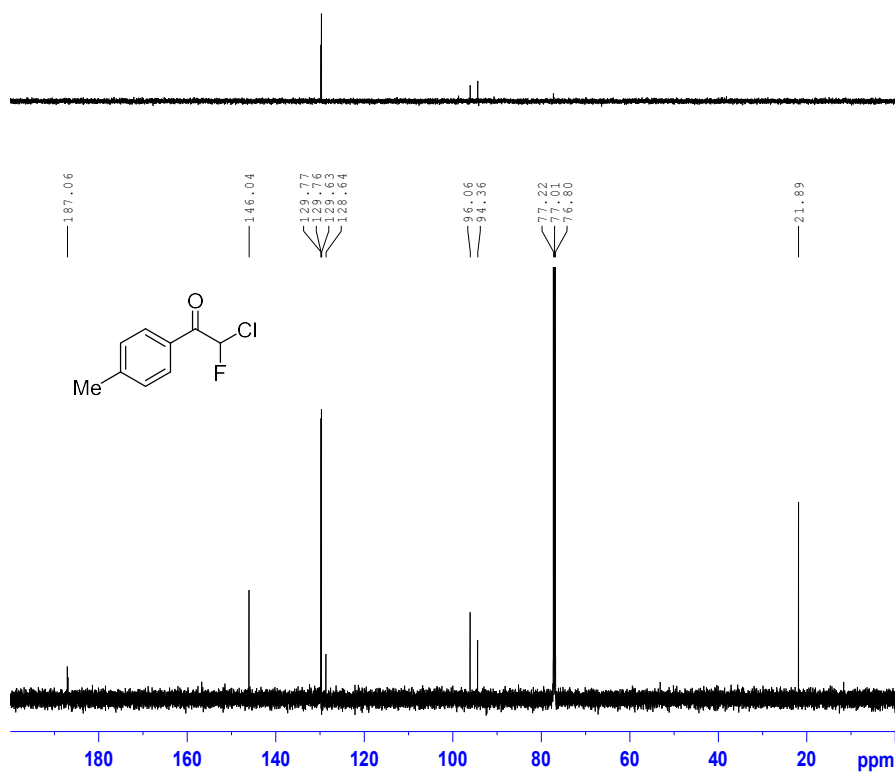

Current Data Parameters  
 NAME 20220228 nmr ynu  
 EXPNO 22  
 PROCNO 1

F2 - Acquisition Parameters  
 Date 20220228  
 Time 12.58 h  
 INSTRUM spect  
 PROBHD Z114607\_0222 (  
 PULPROG zgpg30  
 TD 65536  
 SOLVENT CDCl3  
 NS 2048  
 DS 4  
 SWH 36231.883 Hz  
 FIDRES 1.105709 Hz  
 AQ 0.9043968 sec  
 RG 188.35  
 DW 13.800 usec  
 DE 6.50 usec  
 TE 291.4 K  
 D1 2.00000000 sec  
 D11 0.03000000 sec  
 TD0 1  
 SFO1 150.9279578 MHz  
 NUC1 13C  
 PO 4.00 usec  
 P1 12.00 usec  
 PLW1 97.67099762 W  
 SFO2 600.1724007 MHz  
 NUC2 1H  
 CPDPRG2 waltz65  
 PCPD2 70.00 usec  
 PLW2 27.73900032 W  
 PLW12 0.56610000 W  
 PLW13 0.28475001 W

F2 - Processing parameters  
 SI 32768  
 SF 150.9128681 MHz  
 WDW GM  
 SSB 0  
 LB -0.30 Hz  
 GB 0.3  
 PC 1.40  
 tyf04084-1

<sup>19</sup>F NMR (376 MHz, CDCl<sub>3</sub>)

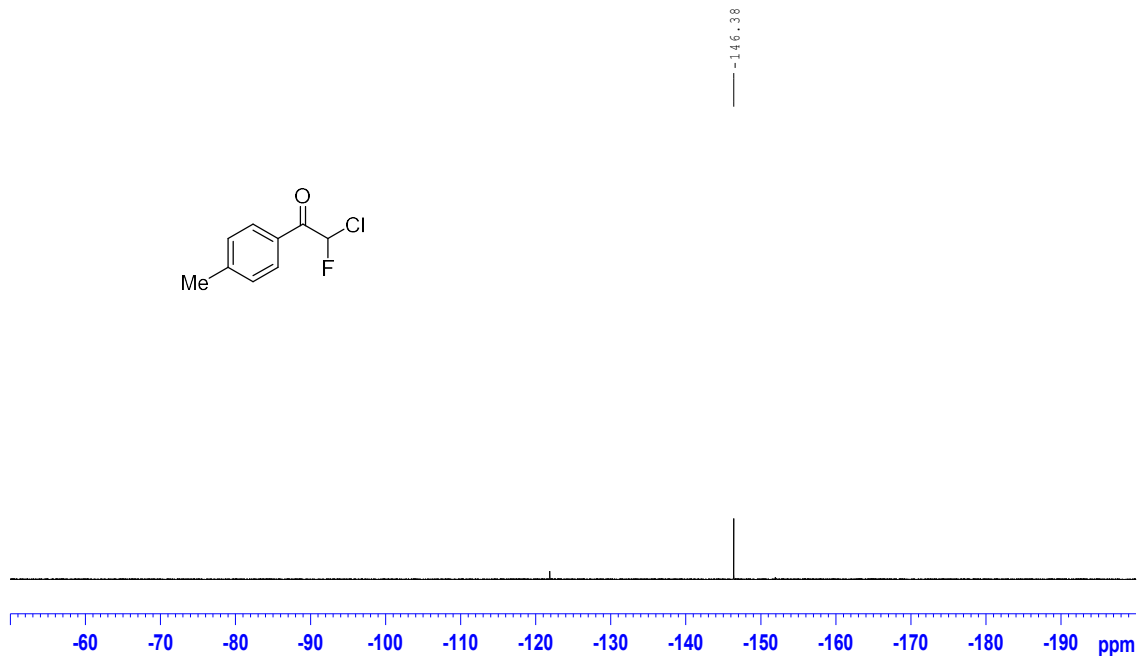

<sup>1</sup>H-NMR (600 MHz, CDCl<sub>3</sub>)

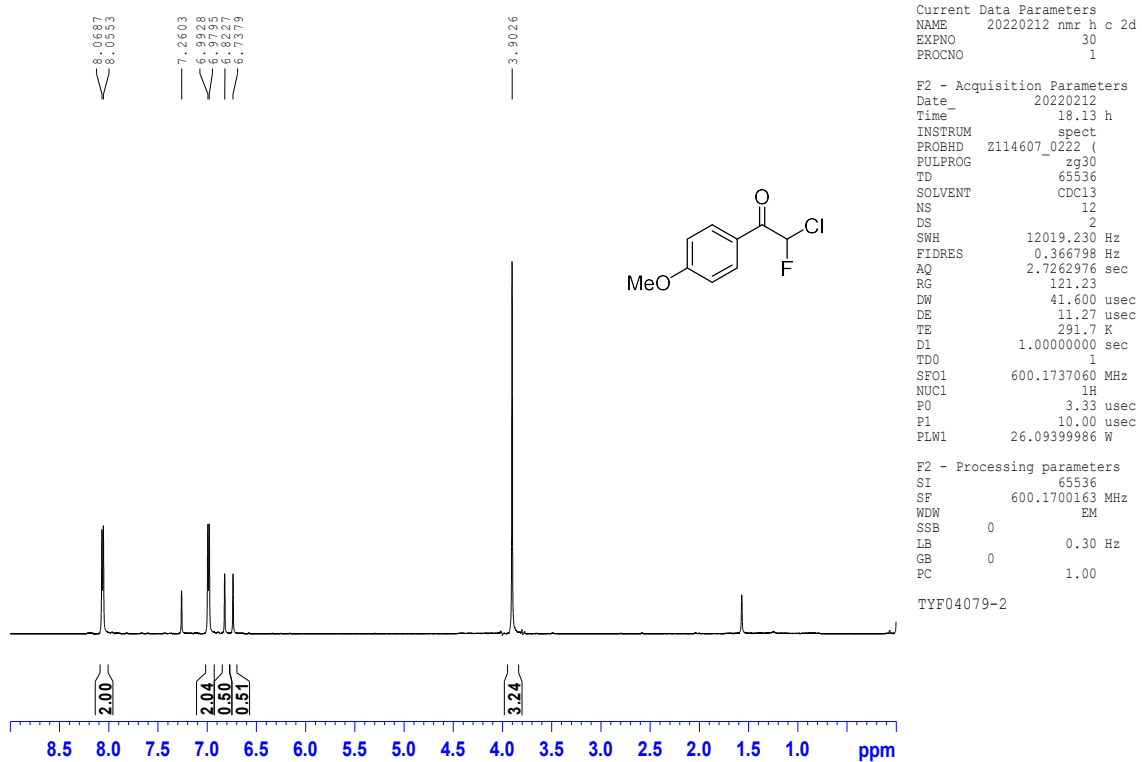

<sup>13</sup>C-NMR (150 MHz, CDCl<sub>3</sub>)

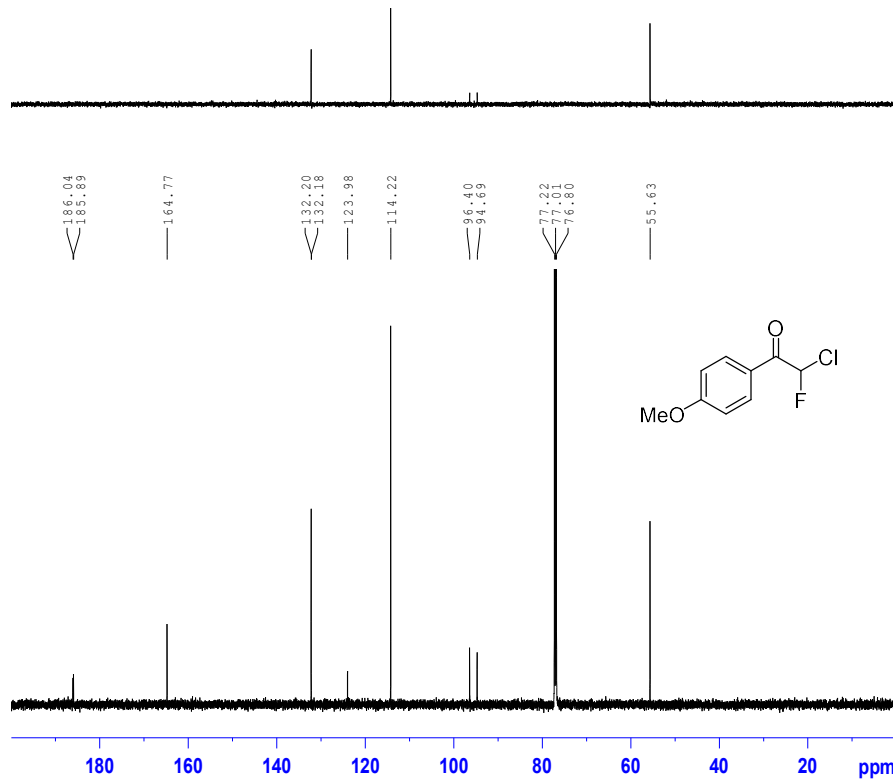

Current Data Parameters  
NAME 20220212 nmr h c 2d  
EXPNO 31  
PROCNO 1

F2 - Acquisition Parameters  
Date 20220212  
Time 18.39 h  
INSTRUM spect  
PROBHD Z114607\_0222 (  
PULPROG zgpg30  
TD 65536  
SOLVENT CDCl3  
NS 512  
DS 4  
SWH 36231.883 Hz  
FIDRES 1.105709 Hz  
AQ 0.9043968 sec  
RG 188.35  
DW 13.800 usec  
DE 6.50 usec  
TE 293.0 K  
D1 2.00000000 sec  
D11 0.03000000 sec  
TD0 1  
SFO1 150.9279578 MHz  
NUC1 13C  
P0 4.00 usec  
P1 12.00 usec  
PLW1 97.67099762 W  
SFO2 600.1724007 MHz  
NUC2 1H  
CPDPRG2 waltz65  
PCPD2 70.00 usec  
PLW2 27.73900032 W  
PLW12 0.56610000 W  
PLW13 0.28475001 W

F2 - Processing parameters  
SI 32768  
SF 150.9128665 MHz  
WDW EM  
SSB 0  
LB 1.00 Hz  
GB 0  
PC 1.40  
TYF04079-2

<sup>19</sup>F NMR (376 MHz, CDCl<sub>3</sub>)

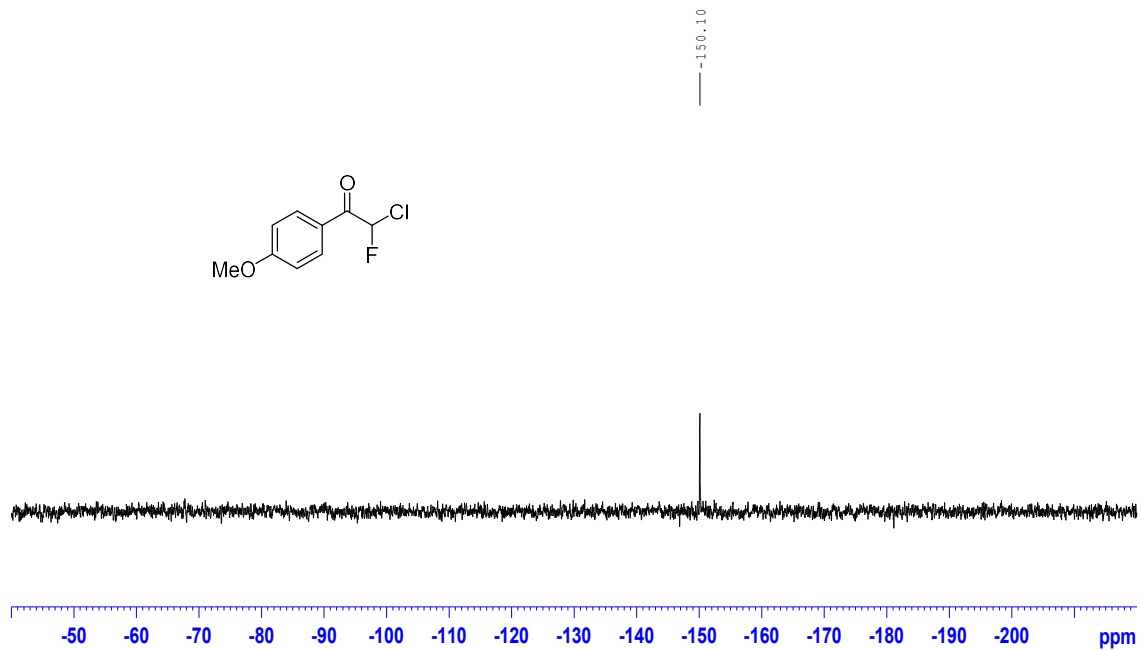

<sup>1</sup>H-NMR (400 MHz, CDCl<sub>3</sub>)

8.1832  
7.5753  
7.5398  
7.5328  
7.4109  
7.3920  
7.3722  
7.2885

3.2982  
3.2874  
3.2587  
3.2578  
3.2298  
3.2110  
3.1956  
3.1194  
3.1154  
3.0986  
3.0766  
3.0621  
3.0213  
2.9791  
2.9644  
2.9508  
2.8801  
2.8656  
2.8541  
2.8225  
2.8121

Current Data Parameters  
NAME 20191208 nmr 400 ynu old  
EXNO 393  
PROCNO 1

F2 - Acquisition Parameters  
Date 20191209  
Time 18.26  
INSTRUM spect  
PROBHD 5 mm PABBO BB/  
PULPROG zg30  
TD 65536  
SOLVENT CDCl3  
NS 8  
DS 0  
SWH 8012.820 Hz  
FIDRES 0.122266 Hz  
AQ 4.0894465 sec  
RG 31.56  
DW 62.400 usec  
DE 6.50 usec  
TE 0 K  
D1 1.00000000 sec  
TDO 1

----- CHANNEL f1 -----  
SF01 400.1522008 MHz  
NUC1 1H  
P1 10.75 usec  
PLW1 17.50000000 W  
F2 - Processing parameters  
SI 65536  
SF 400.1500073 MHz  
WDW EM  
SSB 0  
LB 0.30 Hz  
GB 0  
FC 1.00  
HM02186-1

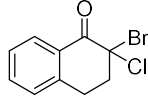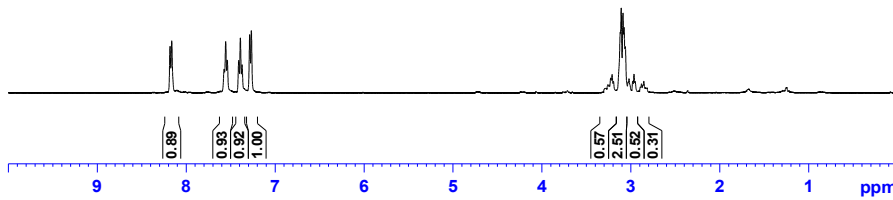

<sup>13</sup>C-NMR (100 MHz, CDCl<sub>3</sub>)

184.2390  
142.1228  
142.0370  
134.6653  
134.5159  
134.5199  
130.0890  
129.9573  
129.9185  
128.7607  
128.7392  
128.6796  
127.9497  
127.6261  
127.5984  
127.3434

77.7580  
77.4084  
77.0909  
76.7728  
67.3766  
45.8380  
44.3651  
43.2342  
29.3222  
28.6299  
27.4692

Current Data Parameters  
NAME 20191208 nmr 400 ynu old  
EXNO 393  
PROCNO 1

F2 - Acquisition Parameters  
Date 20191209  
Time 18.56  
INSTRUM spect  
PROBHD 5 mm PABBO BB/  
PULPROG zgpg30  
TD 65536  
SOLVENT CDCl3  
NS 512  
DS 0  
SWH 25252.525 Hz  
FIDRES 0.385323 Hz  
AQ 1.2976128 sec  
RG 195.85  
DW 19.800 usec  
DE 6.50 usec  
TE 0 K  
D1 2.00000000 sec  
D11 0.03000000 sec  
TDO 1

----- CHANNEL f1 -----  
SF01 100.6283629 MHz  
NUC1 13C  
P1 10.50 usec  
PLW1 74.00000000 W  
----- CHANNEL f2 -----  
SF02 400.1516006 MHz  
NUC2 1H  
CFPRG[2] waltz16  
PCPD2 90.00 usec  
PLW2 17.50000000 W  
PLW12 0.26142001 W  
PLW13 0.13149001 W

F2 - Processing parameters  
SI 32768  
SF 100.6177980 MHz  
WDW EM  
SSB 0  
LB 1.00 Hz  
GB 0  
PC 1.40

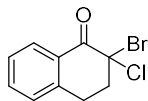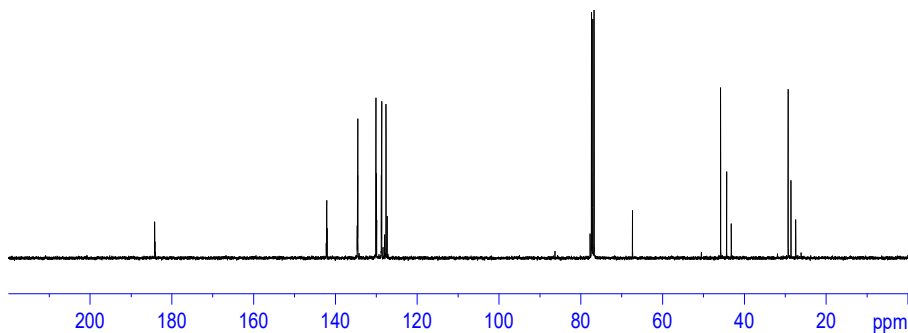

HM02186-1



# <sup>1</sup>H-NMR (400 MHz, CDCl<sub>3</sub>)

7.7986  
7.7601  
7.6660  
7.6423  
7.4807  
7.4622  
7.4205  
7.4052  
7.3186  
7.3000  
7.2829

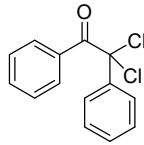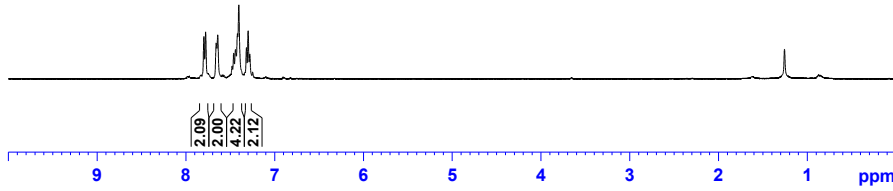

Current Data Parameters  
NAME 20191208 nmr 400 ynu old  
EXPNO 380  
PROCNO 1

F2 - Acquisition Parameters  
Date\_ 20191209  
Time 15.32  
INSTRUM spect  
PROBHD 5 mm PABBO BB/  
PULPROG zg30  
TD 65536  
SOLVENT CDCl3  
NS 8  
DS 0  
SWH 8012.820 Hz  
FIDRES 0.122266 Hz  
AQ 4.0894465 sec  
RG 31.56  
DW 62.400 usec  
DE 6.50 usec  
TE 0 K  
D1 1.00000000 sec  
TDO 1

===== CHANNEL f1 =====  
SFO1 400.1522008 MHz  
NUC1 1H  
P1 10.75 usec  
PLW1 17.50000000 W

F2 - Processing parameters  
SI 65536  
SF 400.1500152 MHz  
WDW EM  
SSB 0  
LB 0.30 Hz  
GB 0  
PC 1.00  
HM02174-1

# <sup>13</sup>C-NMR (100 MHz, CDCl<sub>3</sub>)

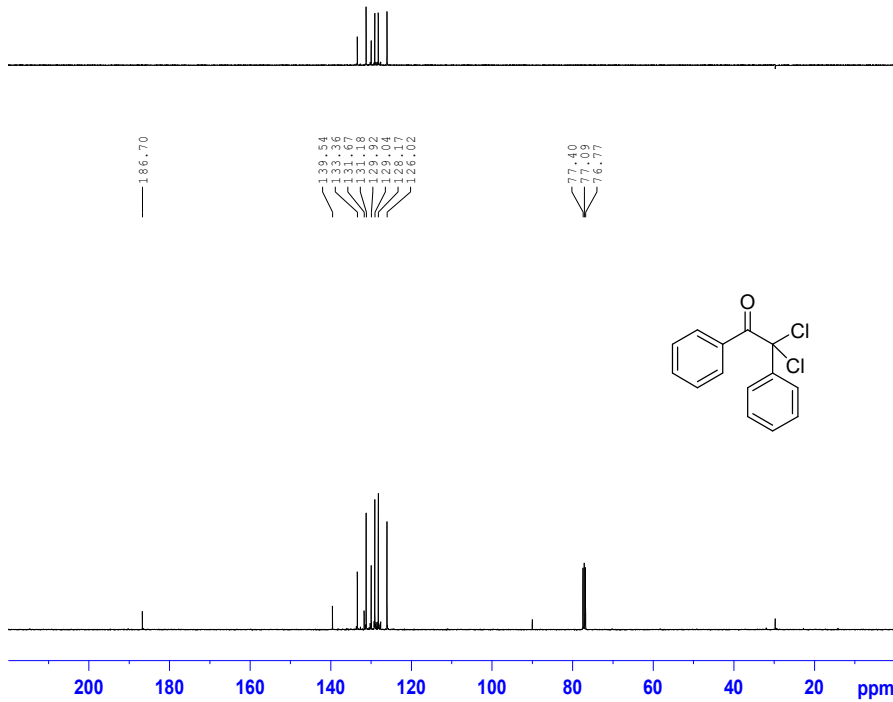

Current Data Parameters  
NAME 20191208 nmr 400 ynu old  
EXPNO 381  
PROCNO 1

F2 - Acquisition Parameters  
Date\_ 20191209  
Time 16.02  
INSTRUM spect  
PROBHD 5 mm PABBO BB/  
PULPROG zgpg30  
TD 65536  
SOLVENT CDCl3  
NS 512  
DS 0  
SWH 25252.525 Hz  
FIDRES 0.385323 Hz  
AQ 1.2976128 sec  
RG 195.85  
DW 19.800 usec  
DE 6.50 usec  
TE 0 K  
D1 2.00000000 sec  
D11 0.03000000 sec  
TDO 1

===== CHANNEL f1 =====  
SFO1 100.6283629 MHz  
NUC1 13C  
P1 10.50 usec  
PLW1 74.00000000 W

===== CHANNEL f2 =====  
SFO2 400.1516006 MHz  
NUC2 1H  
CPDPRG[2] waltz16  
PCPD2 90.00 usec  
PLW2 17.50000000 W  
PLW12 0.26142001 W  
PLW13 0.13149001 W

F2 - Processing parameters  
SI 32768  
SF 100.6177980 MHz  
WDW EM  
SSB 0  
LB 1.00 Hz  
GB 0  
PC 1.40  
HM02174-1

# <sup>1</sup>H-NMR (400 MHz, CDCl<sub>3</sub>)

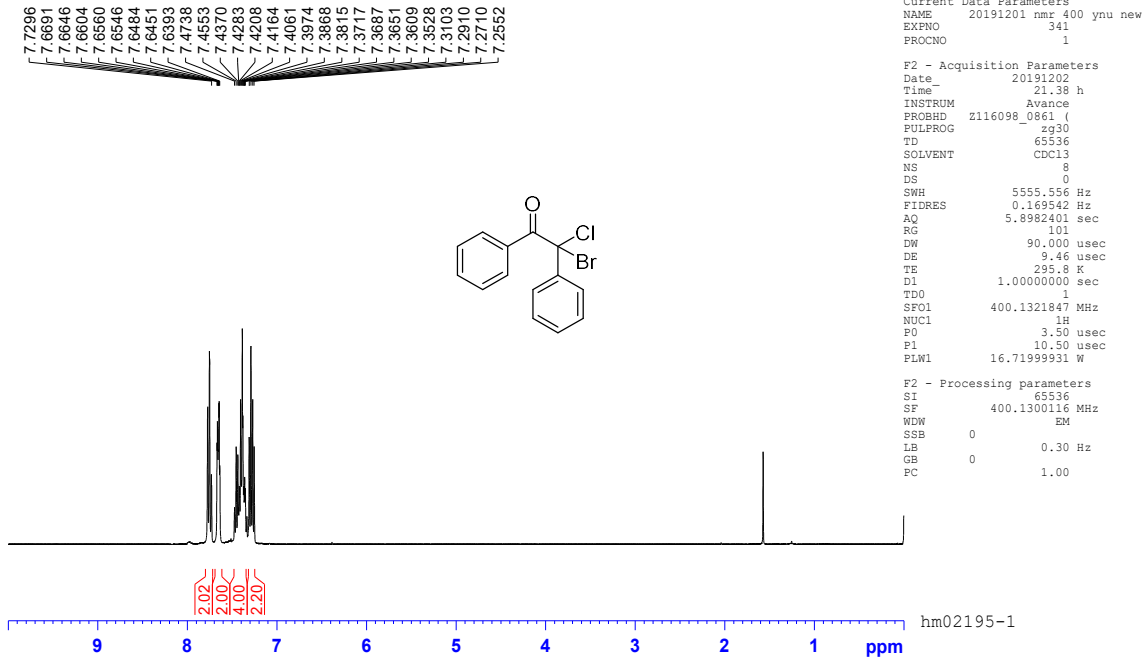

# <sup>13</sup>C-NMR (100 MHz, CDCl<sub>3</sub>)

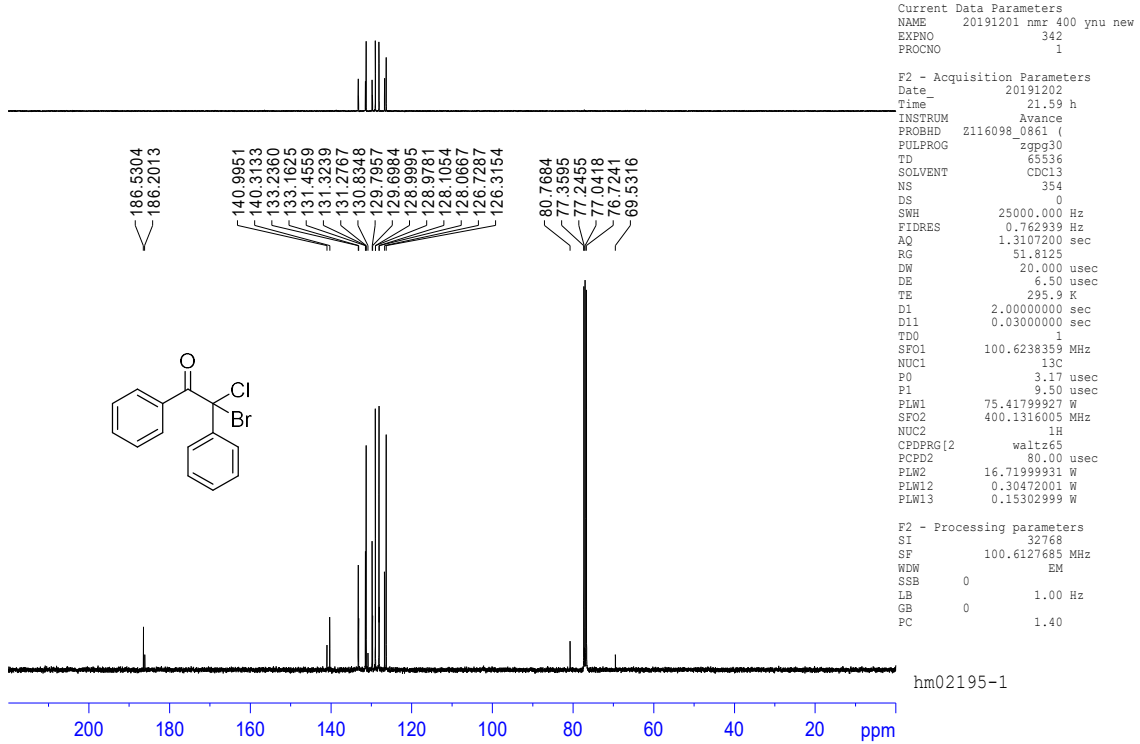

# <sup>1</sup>H-NMR (400 MHz, CDCl<sub>3</sub>)

8.4504  
8.4308  
7.6542  
7.6458  
7.5986  
7.5976  
7.5927  
7.4138  
7.3944  
7.3547  
7.3191  
7.2598  
6.7386  
6.5675  
6.5599

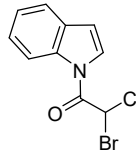

Current Data Parameters  
NAME 20191215 nmr 400 ynu new  
EXPNO 409  
PROCNO 1

F2 - Acquisition Parameters  
Date\_ 20191216  
Time 18.42 h  
INSTRUM Avance  
PROBHD z116098\_0861 (4  
PULPROG zg30  
TD 65536  
SOLVENT cdcl3  
NS 8  
DS 0  
SWH 5555.556 Hz  
FIDRES 0.169542 Hz  
AQ 5.8982401 sec  
RG 101  
DW 90.000 usec  
DE 9.46 usec  
TE 293.8 K  
D1 1.0000000 sec  
TDD 1  
SFO1 400.1321847 MHz  
NUC1 1H  
P0 3.50 usec  
P1 10.50 usec  
PLW1 16.71999931 W

F2 - Processing parameters  
SI 65536  
SF 400.1300101 MHz  
WDW EM  
SSB 0  
LB 0.30 Hz  
GB 0  
PC 1.00

HM02203-1

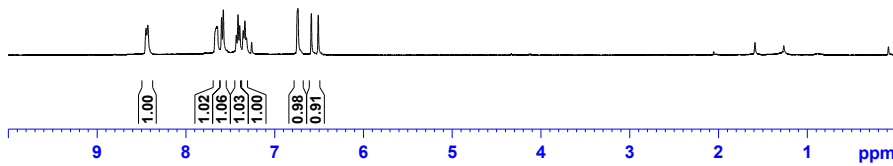

# <sup>13</sup>C-NMR (100 MHz, CDCl<sub>3</sub>)

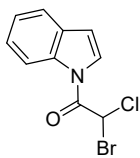

Current Data Parameters  
NAME 20191215 nmr 400 ynu new  
EXPNO 410  
PROCNO 1

F2 - Acquisition Parameters  
Date\_ 20191216  
Time 19.26 h  
INSTRUM Avance  
PROBHD z116098\_0861 (4  
PULPROG zgpg30  
TD 65536  
SOLVENT CDCl3  
NS 766  
DS 0  
SWH 25000.000 Hz  
FIDRES 0.762939 Hz  
AQ 1.3107200 sec  
RG 54.2535  
DW 20.000 usec  
DE 6.50 usec  
TE 295.4 K  
D1 2.0000000 sec  
D11 0.0300000 sec  
TDD 1  
SFO1 100.6238359 MHz  
NUC1 13C  
P0 3.17 usec  
P1 9.50 usec  
PLW1 75.41799927 W  
SFO2 400.1316005 MHz  
NUC2 1H  
CPDPRG2 waltz65  
PCPD2 80.00 usec  
PLW2 16.71999931 W  
PLW12 0.34549999 W  
PLW13 0.17351000 W

F2 - Processing parameters  
SI 32768  
SF 100.6127685 MHz  
WDW EM  
SSB 0  
LB 1.00 Hz  
GB 0  
PC 1.40

HM02203-1

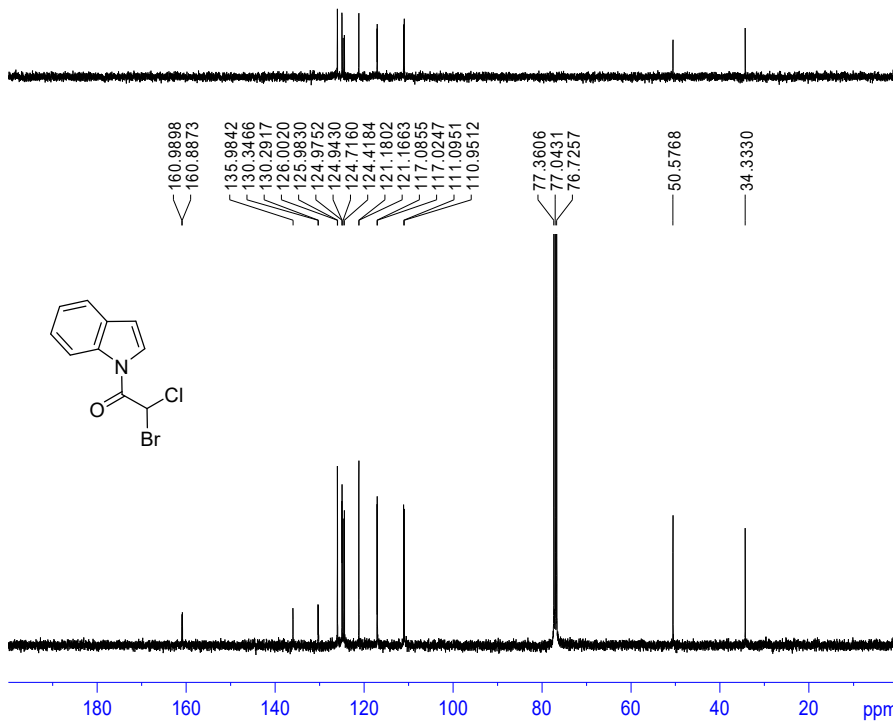

# <sup>1</sup>H-NMR (400 MHz, CDCl<sub>3</sub>)

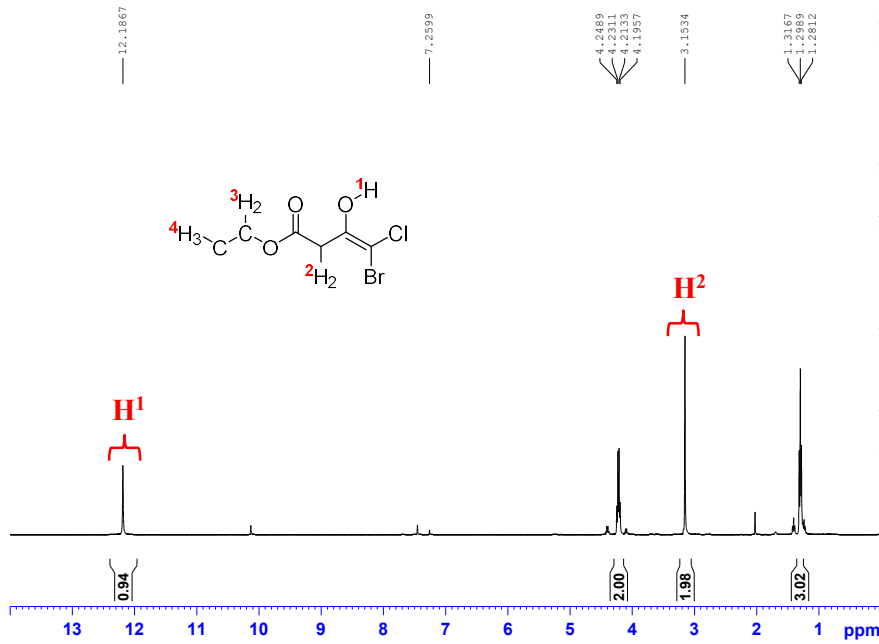

Current Data Parameters  
NAME 20191229 NMR 400 YNU old  
EXPNO 440  
PROCNO 1

F2 - Acquisition Parameters  
Date\_ 20191231  
Time 14.27  
INSTRUM spect  
PROBHD 5 mm PABBO BB/  
PULPROG zg30  
TD 65536  
SOLVENT CDCl3  
NS 8  
DS 0  
SWH 8012.820 Hz  
FIDRES 0.122266 Hz  
AQ 4.0894465 sec  
RG 31.56  
DW 62.400 usec  
DE 6.50 usec  
TE 291.5 K  
D1 1.00000000 sec  
TDO 1

===== CHANNEL f1 =====  
SFO1 400.1522008 MHz  
NUC1 1H  
P1 10.75 usec  
PLW1 17.50000000 W

F2 - Processing parameters  
SI 65536  
SF 400.1500102 MHz  
WDW EM  
SSB 0  
LB 0.30 Hz  
GB 0  
PC 1.00  
HMO2200-1

# <sup>13</sup>C-NMR (100 MHz, CDCl<sub>3</sub>)

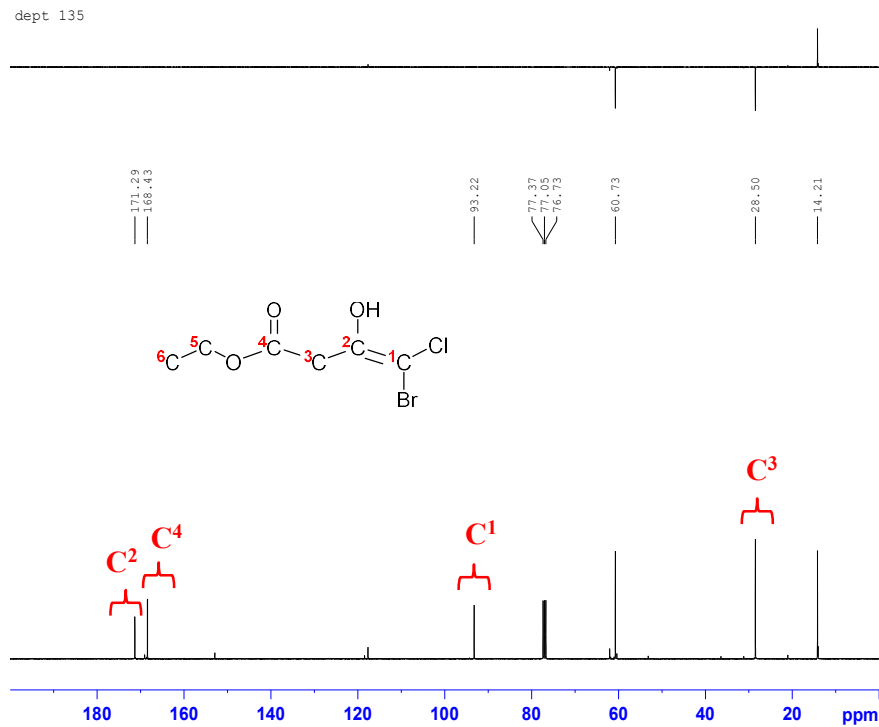

Current Data Parameters  
NAME 20191229  
NMR 400 YNU old  
EXPNO 441  
PROCNO 1

F2 - Acquisition Parameters  
Date\_ 20191231  
Time 14.56  
INSTRUM spect  
PROBHD 5 mm PABBO BB/  
PULPROG zgpg30  
TD 65536  
SOLVENT CDCl3  
NS 500  
DS 0  
SWH 25252.525 Hz  
FIDRES 0.385323 Hz  
AQ 1.2976128 sec  
RG 195.85  
DW 19.800 usec  
DE 6.50 usec  
TE 292.1 K  
D1 2.00000000 sec  
D11 0.03000000 sec  
TDO 1

===== CHANNEL f1 =====  
SFO1 100.6283629 MHz  
NUC1 13C  
P1 10.50 usec  
PLW1 74.00000000 W

===== CHANNEL f2 =====  
SFO2 400.1516006 MHz  
NUC2 1H  
CPDPRG2 walzr16  
PCPD2 90.00 usec  
PLW2 17.50000000 W  
PLW12 0.26142001 W  
PLW13 0.13149001 W

F2 - Processing parameters  
SI 32768  
SF 100.6177980 MHz  
WDW EM  
SSB 0  
LB 1.00 Hz  
GB 0  
PC 1.40  
HMO2200-1

# <sup>1</sup>H-NMR (600 MHz, CDCl<sub>3</sub>)

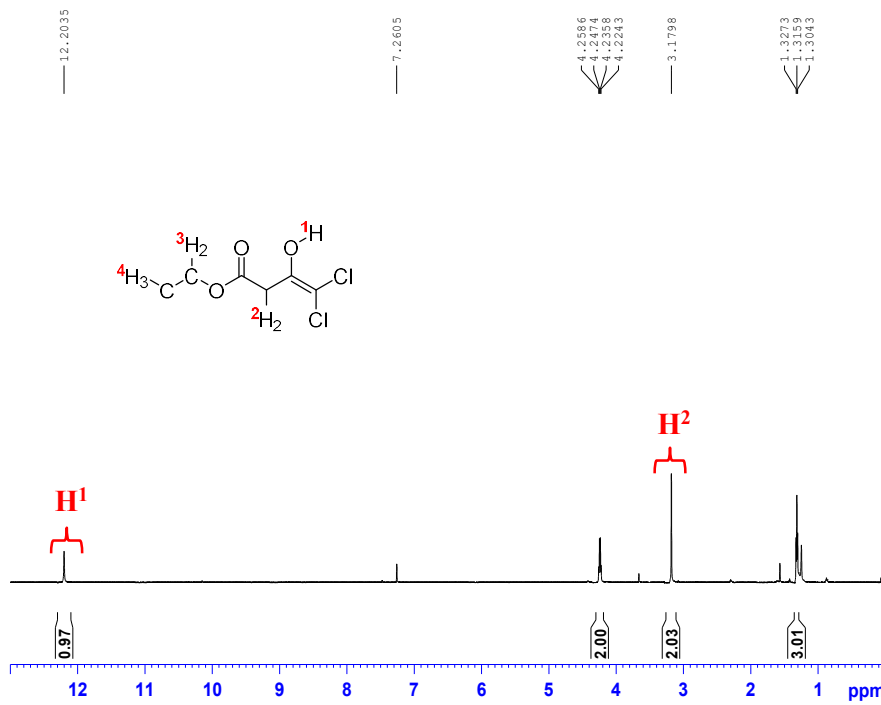

Current Data Parameters  
NAME 20220212 nmr h c 2d  
EXPNO 47  
PROCNO 1

F2 - Acquisition Parameters  
Date\_ 20220212  
Time\_ 21.35 h  
INSTRUM spect  
PROBHD Z114607\_0222 (  
PULPROG zg30  
TD 65536  
SOLVENT CDCl3  
NS 8  
DS 0  
SWH 12019.230 Hz  
FIDRES 0.366798 Hz  
AQ 2.7262976 sec  
RG 121.23  
DW 41.600 usec  
DE 11.27 usec  
TE 291.4 K  
D1 1.0000000 sec  
TD0 1  
SFO1 600.1737060 MHz  
NUC1 1H  
P0 3.33 usec  
P1 10.00 usec  
PLW1 26.09399986 W

F2 - Processing parameters  
SI 65536  
SF 600.1700154 MHz  
WDW EM  
SSB 0  
LB 0.30 Hz  
GB 0  
PC 1.00

TYF04080-1

# <sup>13</sup>C-NMR (150 MHz, CDCl<sub>3</sub>)

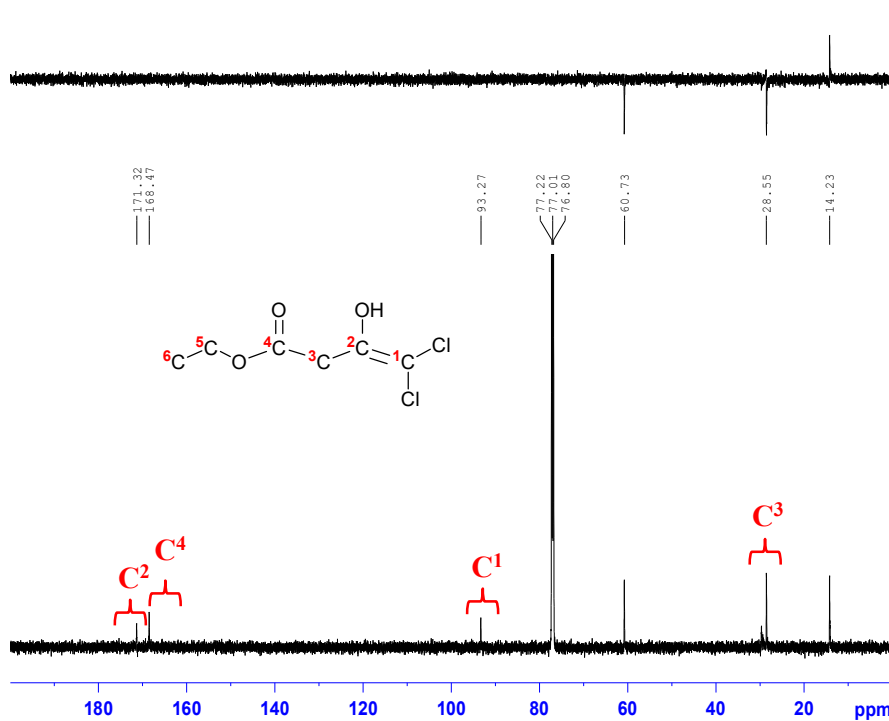

Current Data Parameters  
NAME 20220212 nmr h c 2d  
EXPNO 41  
PROCNO 1

F2 - Acquisition Parameters  
Date\_ 20220212  
Time\_ 19.32 h  
INSTRUM spect  
PROBHD Z114607\_0222 (  
PULPROG zgpg30  
TD 65536  
SOLVENT CDCl3  
NS 800  
DS 4  
SWH 36231.883 Hz  
FIDRES 1.105709 Hz  
AQ 0.9043968 sec  
RG 188.35  
DW 13.800 usec  
DE 6.50 usec  
TE 293.5 K  
D1 2.0000000 sec  
D11 0.0300000 sec  
TD0 1  
SFO1 150.9279578 MHz  
NUC1 13C  
P0 4.00 usec  
P1 12.00 usec  
PLW1 97.67099762 W  
SFO2 600.1724007 MHz  
NUC2 1H  
CPDPRG2 waltz65  
PCPD2 70.00 usec  
PLW2 27.73900032 W  
PLW12 0.56610000 W  
PLW13 0.28475001 W

F2 - Processing parameters  
SI 32768  
SF 150.9128665 MHz  
WDW EM  
SSB 0  
LB 1.00 Hz  
GB 0  
PC 1.40

TYF04080-1

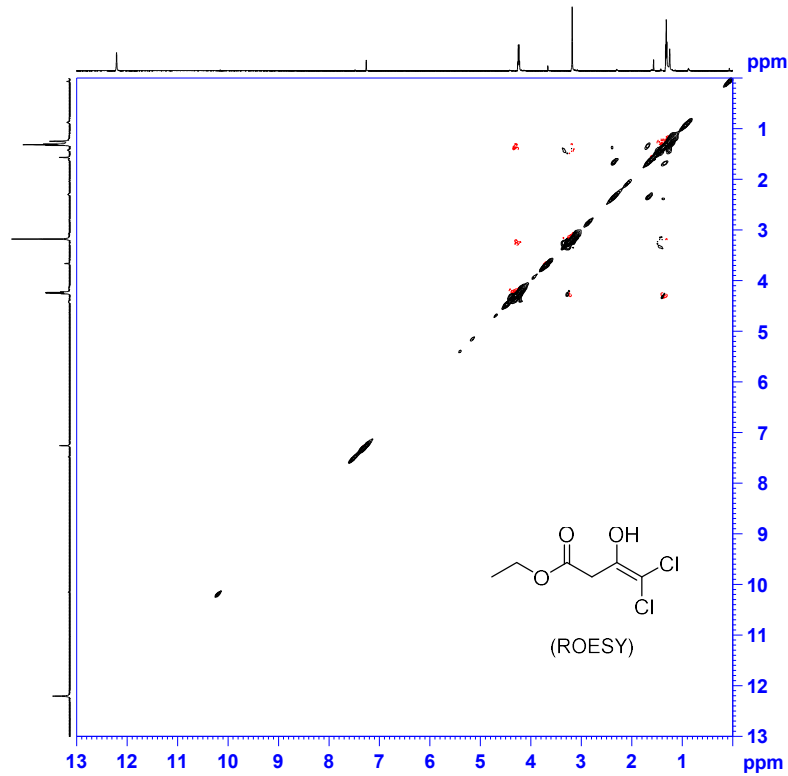

```

Current Data Parameters
NAME      20220212 nmr h c 2d
EXPNO    44
PROCNO    1

F2 - Acquisition Parameters
Date_     20220212
Time      20.51
INSTRUM   spect
PROBHD    zll14607 0222 (
PULPROG   roesypppp2
TD         2048
SOLVENT   CDCl3
NS         4
DS         32
SWH        9259.259 Hz
FIDRES     4.521122 Hz
AQ         0.1105920 sec
RG         61.75
DM         54.000 usec
DE         6.50 usec
TE         291.8 K
d0         -0.0001037 sec
D1         2.05980110 sec
d11        0.03000000 sec
d12        0.00002000 sec
in0        0 sec
l4         2556
PL1        920000.00 usec
SPICNT     0
d0orig     -0.00001037 sec
philoop    0
tiloop     0
SF01       600.1736438 MHz
NUC1       1H
P1         10.00 usec
P17        2500.00 usec
P25        180.00 usec
PLW1       26.0939986 W
PLW10      4.17500019 W
PLW27      0.32214999 W

F1 - Acquisition parameters
TD         256
SF01       600.1736 MHz
FIDRES     36.168980 Hz
SW         15.428 ppm
FnMODE     States-TPPI

F2 - Processing parameters
SI         1024
SF         600.1699832 MHz
WDW        QSINE
SSB        2
LB         0 Hz
GB         0
PC         1.00

F1 - Processing parameters
SI         1024
MC2        States-TPPI
SF         600.1699832 MHz
WDW        QSINE
SSB        2
LB         0 Hz
GB         0
  
```

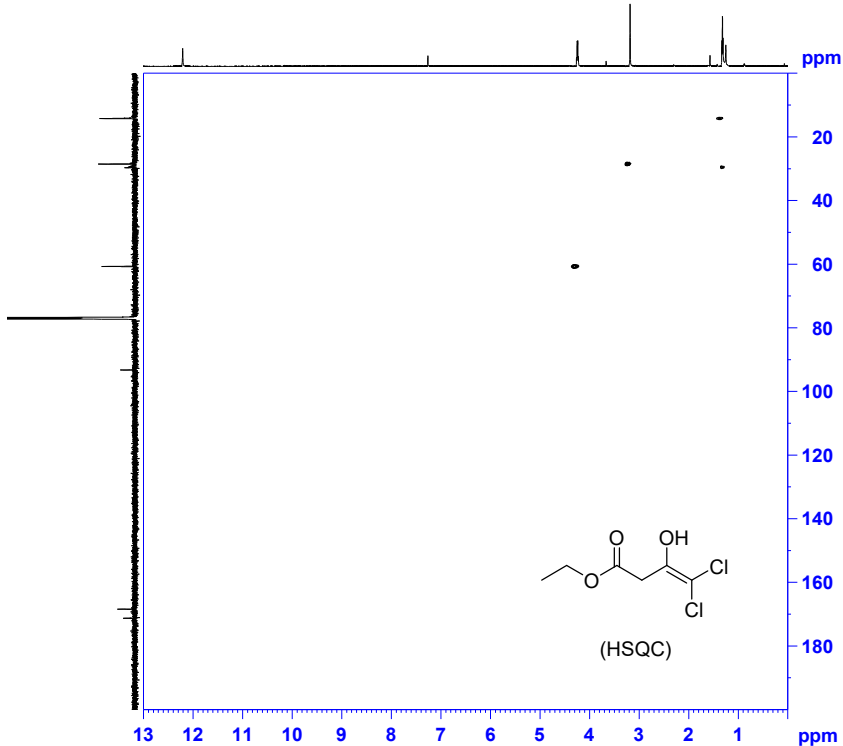

```

Current Data Parameters
NAME      20220212 nmr h c 2d
EXPNO    45
PROCNO    1

F2 - Acquisition Parameters
Date_     20220212
Time      21.00
INSTRUM   spect
PROBHD    zll14607 0222 (
PULPROG   hsqcstgq12
TD         2048
SOLVENT   CDCl3
NS         2
DS         16
SWH        9259.259 Hz
FIDRES     4.521122 Hz
AQ         0.1105920 sec
RG         188.35
DM         54.000 usec
DE         9.83 usec
TE         291.1 K
CONST2    145.0000000 sec
d0         0.00000000 sec
d1         1.50000000 sec
d4         0.00172414 sec
d11        0.03000000 sec
d14        0.00000000 sec
d24        0.00086207 sec
DELTA     0.00127600 sec
DELTA1    0.00131005 sec
DELTA2    0.00000007 sec
DELTA3    0.00052414 sec
l10        0 sec
STCNT     0
SFOUR     0
d0orig     0.00000000 sec
philoop    0
tiloop     0
SF01       600.1736438 MHz
NUC1       13C
P1         10.00 usec
P2         20.00 usec
P28        1000.00 usec
PLW1       26.0939986 W
PLW2       150.9247005 W
MUC2       13C
CPDPRG12  0
P3         12.00 usec
P4         24.00 usec
PCPD2     60.00 usec
PSE2      97.67099762 W
PLW12     3.90680003 W
GRAM[1]   SMSQ10.100
GRAM[2]   SMSQ10.100
GRAM[3]   SMSQ10.100
GRAM[4]   SMSQ10.100
GSE1      80.00 %
GSE2      20.10 %
GSE3      11.00 %
GSE4      -5.00 %
P16        1000.00 usec
P19        600.00 usec

F1 - Acquisition parameters
TD         256
SF01       150.9248 MHz
FIDRES     106.148994 Hz
SW         180.047 ppm
FnMODE     Echo-Antiecho

F2 - Processing parameters
SI         2048
SF         600.1699832 MHz
WDW        QSINE
SSB        2
LB         0 Hz
GB         0
PC         1.40

F1 - Processing parameters
SI         1024
MC2        echo-antiecho
SF         150.9122865 MHz
WDW        QSINE
SSB        2
LB         0 Hz
GB         0
  
```

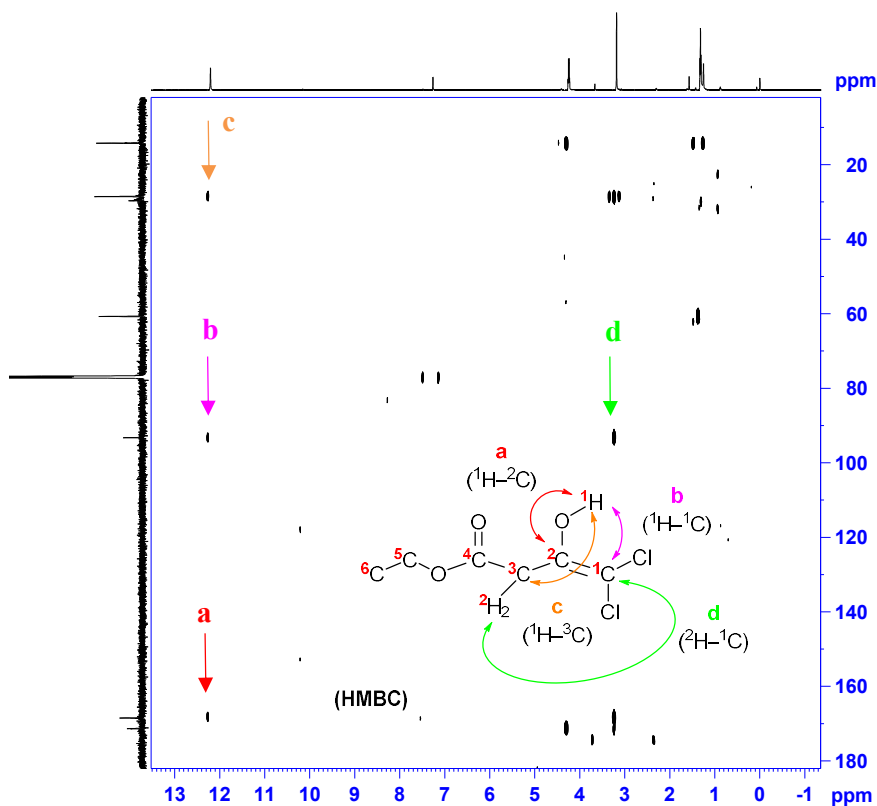

```

Current Data Parameters
NAME      20220112_msr_h_c_24
EXPNO    48
PROCNO   1

F2 - Acquisition Parameters
Date_    20220212
Time     22.29
INSTRUM  spect
PROBHD   z114607_0212 (
PULPROG  hmbogp1pndgaf
TD        8192
SOLVENT  CDCl3
NS        12
DS        16
SWH       8928.571 Hz
FIDRES    1.089913 Hz
AQ        0.4587520 sec
RG        188.35
DW        56.000 usec
DE        6.50 usec
TE        291.3 K
CNS22    145.000000
CNS213   10.000000
SQ        0.00000000 sec
D1        1.50000000 sec
d2        0.00344828 sec
d6        0.00000000 sec
D16       0.00020000 sec
in0       0 sec
STCNT    0
d0orig   0.00000300 sec
philoop  0
l1loop   0
SF01     600.1736359 MHz
NUC1     1H
P1        10.00 usec
P2        20.00 usec
PLW1     26.09399996 W
SF02     150.9296179 MHz
NUC2     13C
P3        12.00 usec
PLW2     97.87099762 W
GPNAM[1] SMSQ10.100
GPNAM[2] SMSQ10.100
GPNAM[3] SMSQ10.100
GPZ1     50.00 %
GPZ2     30.00 %
GPZ3     40.10 %
P16      1000.00 usec

F1 - Acquisition parameters
TD        128
SF01     150.9296 MHz
FIDRES    258.692047 Hz
SW        219.391 ppm
FQMODE    QF

F2 - Processing parameters
SI        8192
SF        600.1699832 MHz
WDW       QSIINE
SSB       0
LB        0 Hz
GB        0
PC        1.40

F1 - Processing parameters
SI        1024
MC2       QF
SF        150.9128665 MHz
WDW       QSIINE
SSB       0
LB        0 Hz
GB        0
  
```

# <sup>1</sup>H-NMR (500 MHz, CDCl<sub>3</sub>)

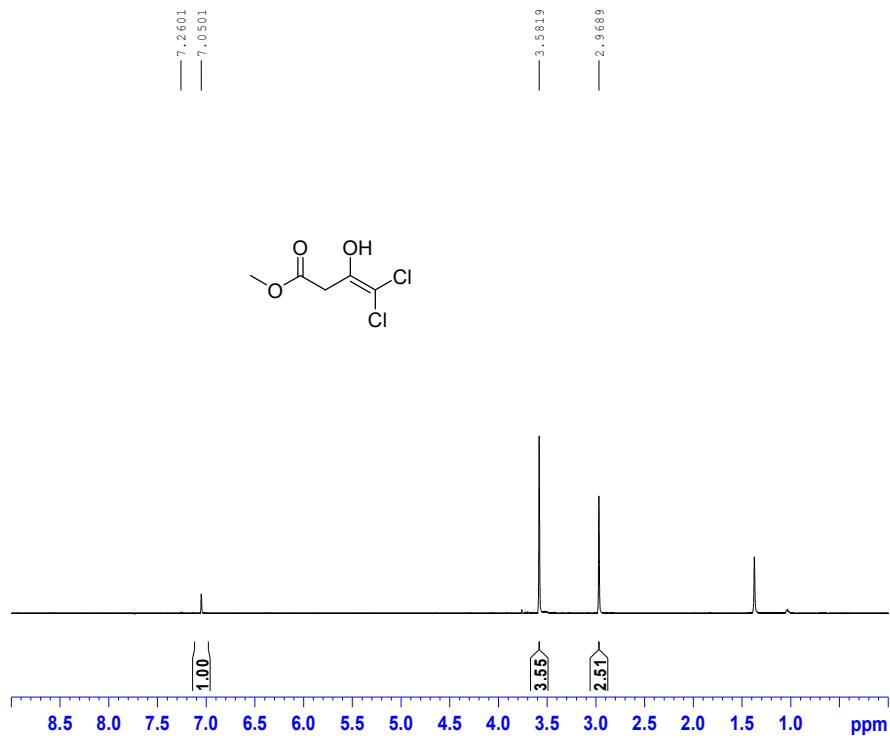

Current Data Parameters  
NAME 20211125 nmr h  
EXPNO 70  
PROCNO 1

F2 - Acquisition Parameters  
Date\_ 20211125  
Time 12.17 h  
INSTRUM spect  
PROBHD z113652\_0230 ( )  
PULPROG zg30  
TD 65536  
SOLVENT CDCl3  
NS 3  
DS 2  
SWH 10000.000 Hz  
FIDRES 0.305176 Hz  
AQ 3.2767999 sec  
RG 169.48  
DW 50.000 usec  
DE 13.89 usec  
TE 296.3 K  
D1 1.00000000 sec  
TDO 1  
SF01 500.1330883 MHz  
NUC1 1H  
PO 3.33 usec  
P1 10.00 usec  
PLW1 25.23200035 W

F2 - Processing parameters  
SI 65536  
SF 500.1301173 MHz  
WDW EM  
SSB 0  
LB 0.30 Hz  
GB 0  
PC 1.00  
TYF04052-1

# <sup>13</sup>C-NMR (125 MHz, CDCl<sub>3</sub>)

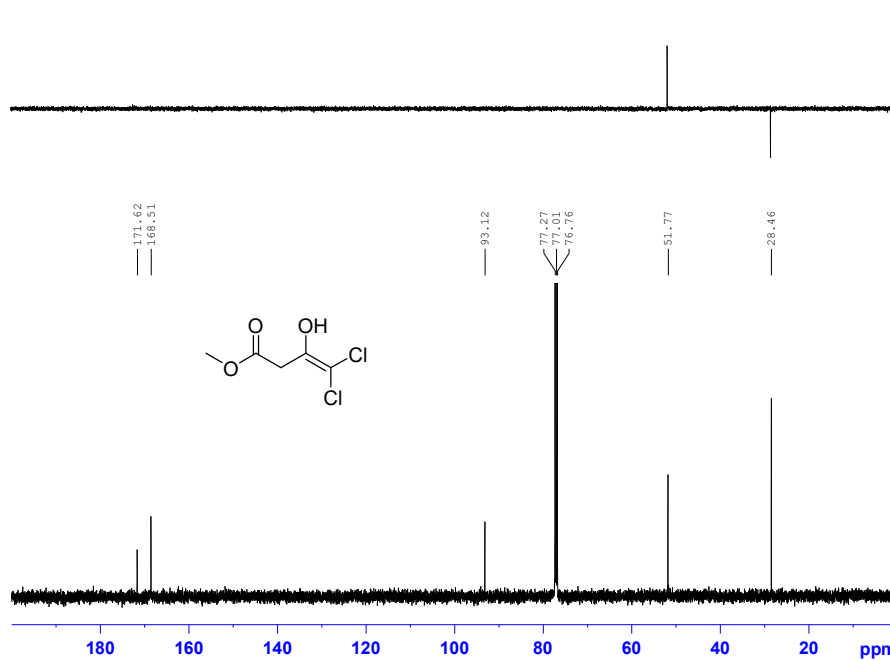

Current Data Parameters  
NAME 20211125 nmr c  
EXPNO 72  
PROCNO 1

F2 - Acquisition Parameters  
Date\_ 20211125  
Time 19.23 h  
INSTRUM spect  
PROBHD z113652\_0230 ( )  
PULPROG zgpg30  
TD 65536  
SOLVENT CDCl3  
NS 221  
DS 4  
SWH 29761.904 Hz  
FIDRES 0.908261 Hz  
AQ 1.1010048 sec  
RG 190.79  
DW 16.800 usec  
DE 6.50 usec  
TE 297.6 K  
D1 2.00000000 sec  
D11 0.03000000 sec  
TDO 1  
SF01 125.7703643 MHz  
NUC1 13C  
PO 3.33 usec  
P1 10.00 usec  
PLW1 102.87999725 W  
SF02 500.1320005 MHz  
NUC2 1H  
CPDPRG2 waltz65  
PCPD2 80.00 usec  
PLW2 25.23200035 W  
PLW12 0.39425001 W  
PLW13 0.19831000 W

F2 - Processing parameters  
SI 32768  
SF 125.7577885 MHz  
WDW EM  
SSB 0  
LB 1.00 Hz  
GB 0  
PC 1.40  
TYF04052-1



# <sup>1</sup>H-NMR (400 MHz, CDCl<sub>3</sub>)

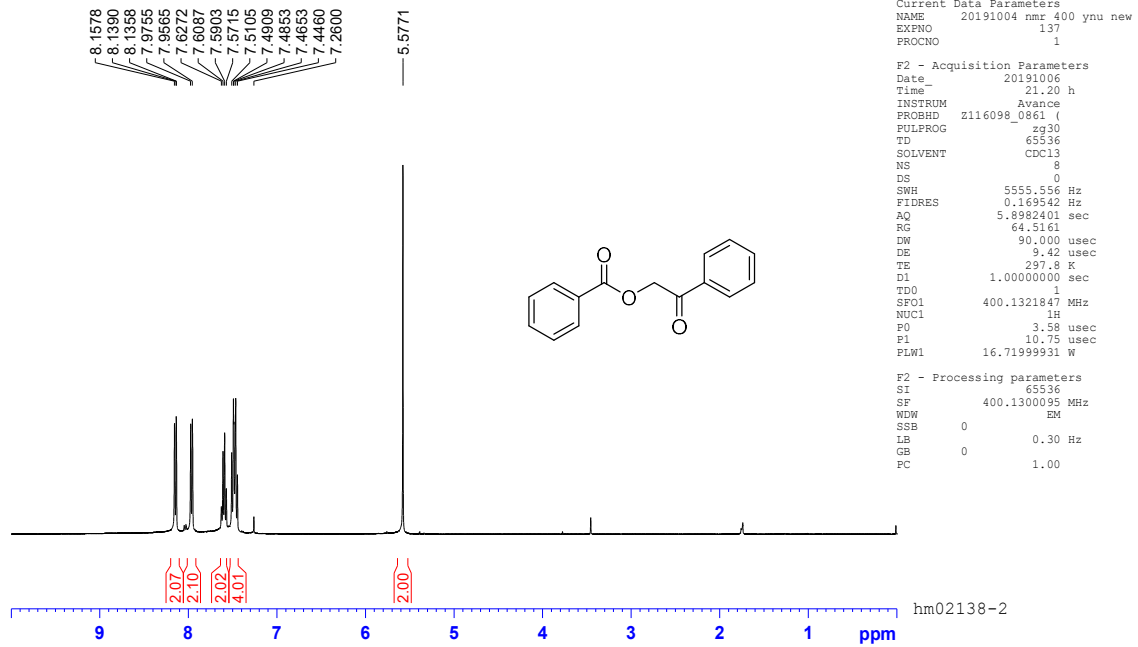

# <sup>13</sup>C-NMR (100 MHz, CDCl<sub>3</sub>)

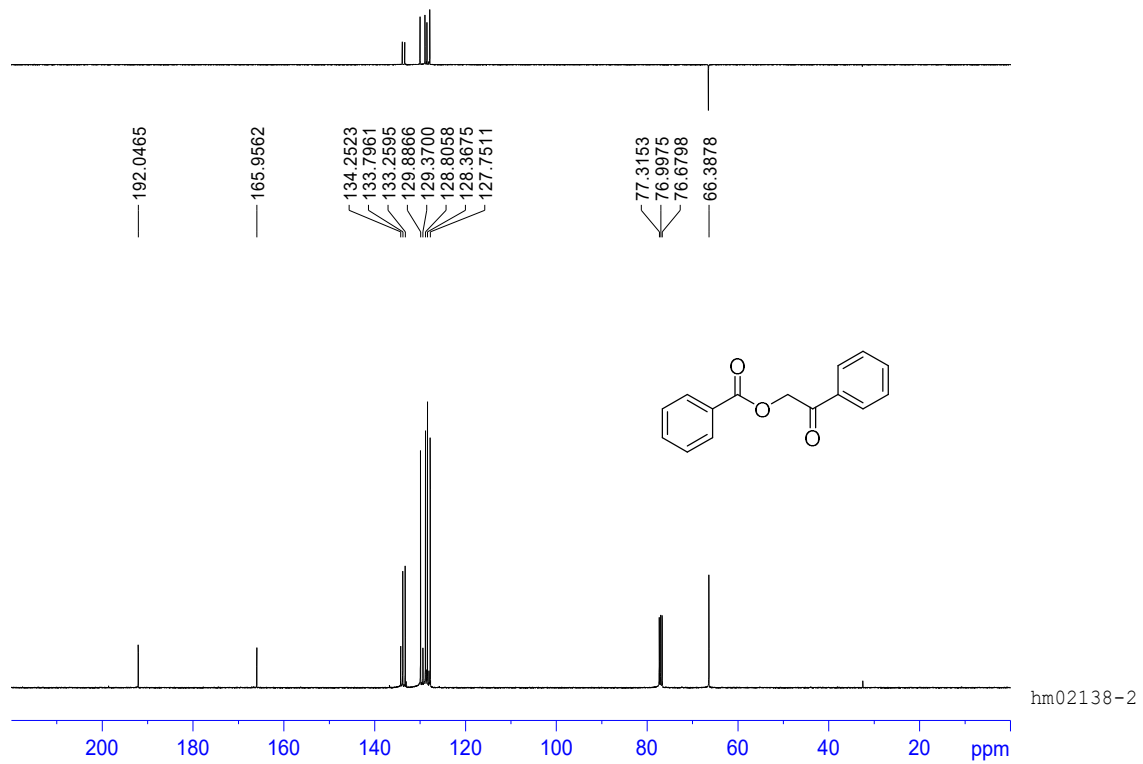

# <sup>1</sup>H-NMR (400 MHz, CDCl<sub>3</sub>)

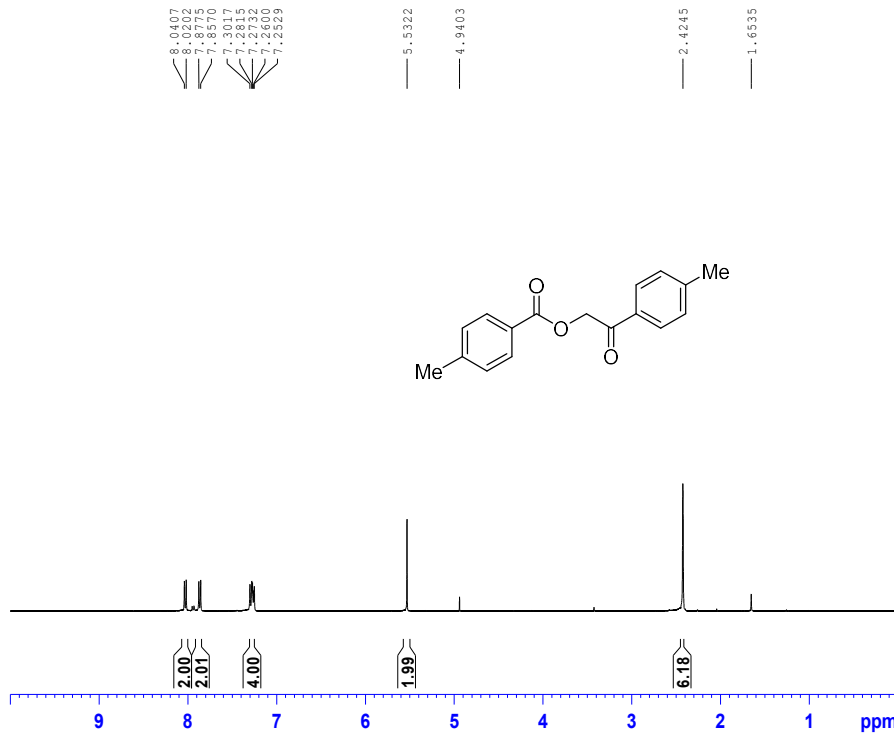

Current Data Parameters  
NAME 20191013 nmr 400 ynu new  
EXPNO 189  
PROCNO 1

F2 - Acquisition Parameters  
Date\_ 20191014  
Time 9.45 h  
INSTRUM Avance  
PROBHD z116098\_0861 ( zgg30  
PULPROG zg30  
TD 65536  
SOLVENT CDCl3  
NS 8  
DS 0  
SWH 5555.556 Hz  
FIDRES 0.169542 Hz  
AQ 5.8982401 sec  
RG 101  
DW 90.000 usec  
DE 9.42 usec  
TE 297.2 K  
D1 1.0000000 sec  
TD0 1  
SFO1 400.1321847 MHz  
NUC1 1H  
FO 3.58 usec  
PI 10.75 usec  
PLW1 16.71999931 W

F2 - Processing parameters  
SI 65536  
SF 400.1300095 MHz  
WDW EM  
SSB 0  
LB 0.30 Hz  
GB 0  
PC 1.00

hm02145-2

# <sup>13</sup>C-NMR (100 MHz, CDCl<sub>3</sub>)

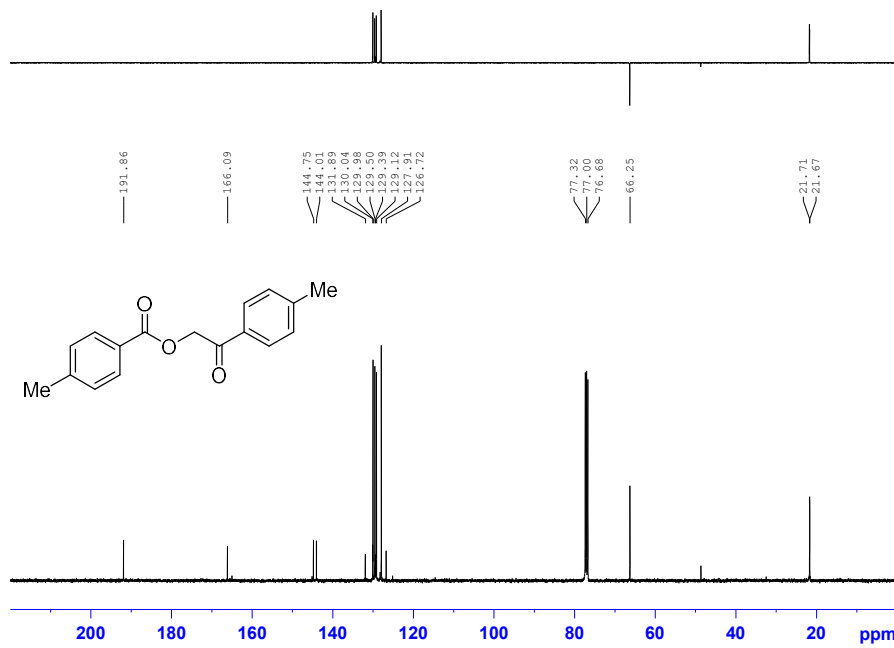

Current Data Parameters  
NAME 20191013 nmr 400 ynu new  
EXPNO 190  
PROCNO 1

F2 - Acquisition Parameters  
Date\_ 20191014  
Time 10.15 h  
INSTRUM Avance  
PROBHD z116098\_0861 ( zgg30  
PULPROG zgpg30  
TD 65536  
SOLVENT CDCl3  
NS 512  
DS 0  
SWH 25000.000 Hz  
FIDRES 0.762939 Hz  
AQ 1.3107200 sec  
RG 101  
DW 20.000 usec  
DE 6.50 usec  
TE 298.1 K  
D1 2.0000000 sec  
D11 0.0300000 sec  
TD0 1  
SFO1 100.6238359 MHz  
NUC1 13C  
FO 3.33 usec  
PI 10.00 usec  
PLW1 75.41799927 W  
SFO2 400.1316005 MHz  
NUC2 1H  
CPDPRG(2) waltz65  
PCPD2 80.00 usec  
PLW2 16.71999931 W  
PLW12 0.34549999 W  
PLW13 0.17351000 W

F2 - Processing parameters  
SI 32768  
SF 100.6127726 MHz  
WDW EM  
SSB 0  
LB 1.00 Hz  
GB 0  
PC 1.40

hm02145-2

<sup>1</sup>H-NMR (300 MHz, CDCl<sub>3</sub>)

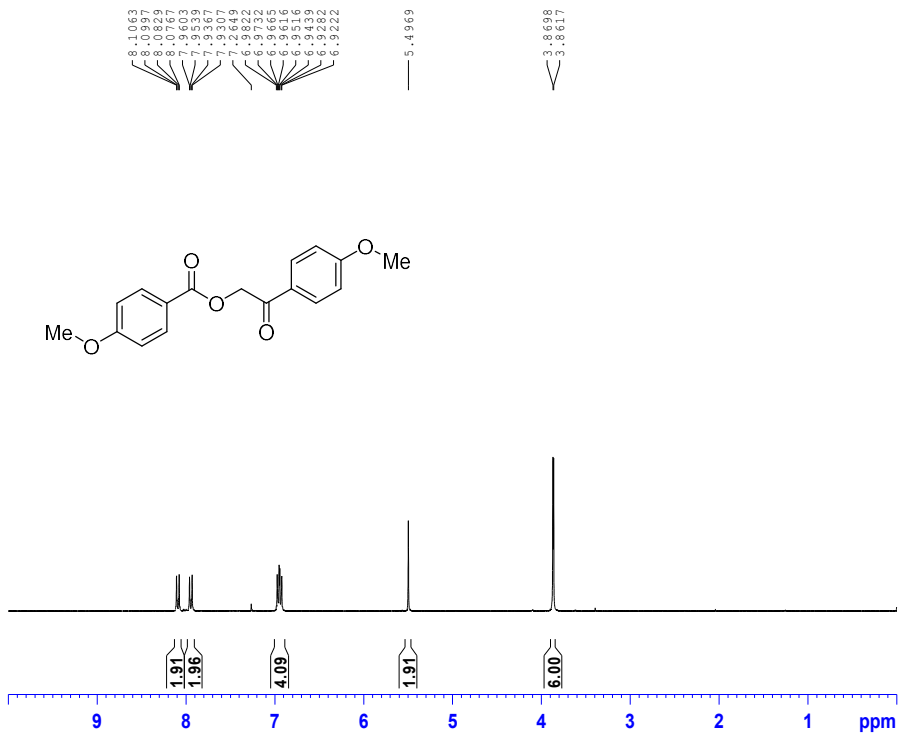

Current Data Parameters  
 NAME 20181221-20190530 NMR 300 YNU  
 EXPNO 541  
 PROCNO 1  
 F2 - Acquisition Parameters  
 Date\_ 20190401  
 Time 2.22  
 INSTRUM sv300  
 PROBHD 5 mm QNP 1H/13  
 PULPROG zg30  
 TD 65536  
 SOLVENT CDCl3  
 NS 8  
 DS 0  
 SWH 6172.839 Hz  
 FIDRES 0.094190 Hz  
 AQ 5.3084159 sec  
 RG 181  
 DW 81.000 usec  
 DE 6.50 usec  
 TE 294.7 K  
 D1 1.0000000 sec  
 TD0 1  
 SFO1 300.1318534 MHz  
 NUCL1 1H  
 P1 8.25 usec  
 PLW1 -1.0000000 W  
 F2 - Processing parameters  
 SI 32768  
 SF 300.1300106 MHz  
 WDW EM  
 SSB 0  
 LB 0.30 Hz  
 GB 0  
 PC 1.00  
 bzhm02011

<sup>13</sup>C-NMR (150 MHz, CDCl<sub>3</sub>)

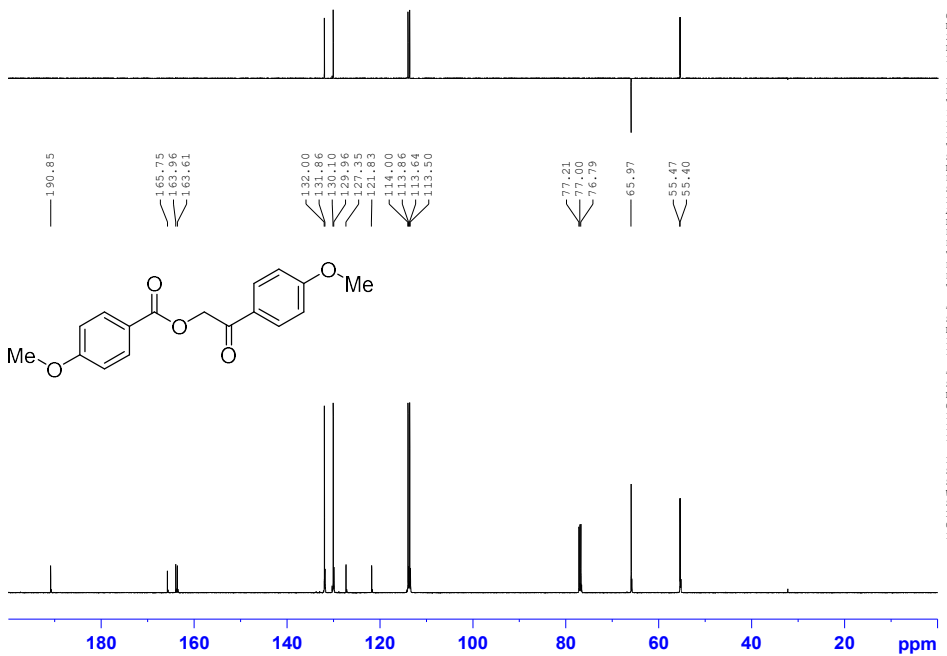

Current Data Parameters  
 NAME bzhm02011  
 20190410-2 600 K18 chen  
 EXPNO 4  
 PROCNO 1  
 F2 - Acquisition Parameters  
 Date\_ 20190412  
 Time 2.30  
 INSTRUM spect  
 PROBHD 5 mm CPQC 1H-  
 PULPROG zgdc  
 TD 65536  
 SOLVENT CDCl3  
 NS 800  
 DS 4  
 SWH 36231.883 Hz  
 FIDRES 0.552855 Hz  
 AQ 0.9043968 sec  
 RG 199.06  
 DW 13.800 usec  
 DE 18.00 usec  
 TE 298.0 K  
 D1 2.0000000 sec  
 D11 0.0300000 sec  
 TD0 1  
 ----- CHANNEL f1 -----  
 SFO1 150.9438010 MHz  
 NUCL1 13C  
 P1 11.20 usec  
 PLW1 94.0000000 W  
 ----- CHANNEL f2 -----  
 SFO2 600.2294009 MHz  
 NUCL2 1H  
 CPDPRG2 waltz16  
 FCPD2 80.00 usec  
 PLW2 2.89730000 W  
 PLW12 0.06519000 W  
 F2 - Processing parameters  
 SI 131072  
 SF 150.9272810 MHz  
 WDW EM  
 SSB 0  
 LB 1.00 Hz  
 GB 0  
 PC 1.40  
 hm02011

# <sup>1</sup>H-NMR (300 MHz, CDCl<sub>3</sub>)

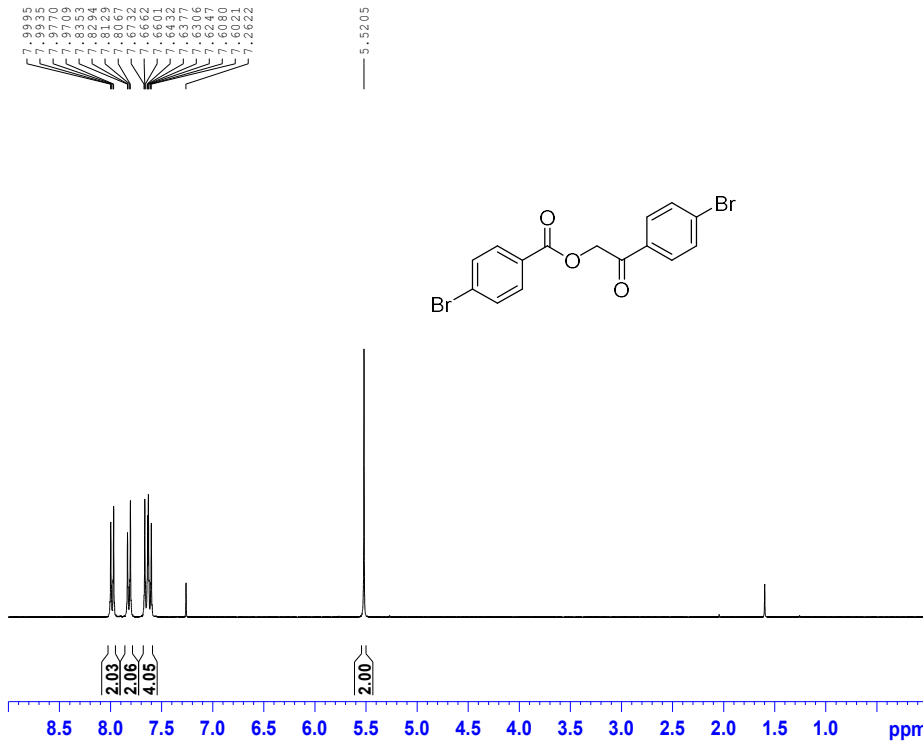

# <sup>1</sup>H-NMR (600 MHz, CDCl<sub>3</sub>)

8.049  
8.040  
8.030  
7.855  
7.851  
7.845  
7.839  
7.835  
7.825  
7.815  
7.811  
7.805  
7.795  
7.785  
7.775  
7.765  
7.755  
7.745  
7.735  
7.725  
7.715  
7.705  
7.695  
7.685  
7.675  
7.665  
7.655  
7.645  
7.635  
7.625  
7.615  
7.605  
7.595  
7.585  
7.575  
7.565  
7.555  
7.545  
7.535  
7.525  
7.515  
7.505  
7.495  
7.485  
7.475  
7.465  
7.455  
7.445  
7.435  
7.425  
7.415  
7.405  
7.395  
7.385  
7.375  
7.365  
7.355  
7.345  
7.335  
7.325  
7.315  
7.305  
7.295  
7.285  
7.275  
7.265  
7.255  
7.245  
7.235  
7.225  
7.215  
7.205  
7.195  
7.185  
7.175  
7.165  
7.155  
7.145  
7.135  
7.125  
7.115  
7.105  
7.095  
7.085  
7.075  
7.065  
7.055  
7.045  
7.035  
7.025  
7.015  
7.005  
6.995  
6.985  
6.975  
6.965  
6.955  
6.945  
6.935  
6.925  
6.915  
6.905  
6.895  
6.885  
6.875  
6.865  
6.855  
6.845  
6.835  
6.825  
6.815  
6.805  
6.795  
6.785  
6.775  
6.765  
6.755  
6.745  
6.735  
6.725  
6.715  
6.705  
6.695  
6.685  
6.675  
6.665  
6.655  
6.645  
6.635  
6.625  
6.615  
6.605  
6.595  
6.585  
6.575  
6.565  
6.555  
6.545  
6.535  
6.525  
6.515  
6.505  
6.495  
6.485  
6.475  
6.465  
6.455  
6.445  
6.435  
6.425  
6.415  
6.405  
6.395  
6.385  
6.375  
6.365  
6.355  
6.345  
6.335  
6.325  
6.315  
6.305  
6.295  
6.285  
6.275  
6.265  
6.255  
6.245  
6.235  
6.225  
6.215  
6.205  
6.195  
6.185  
6.175  
6.165  
6.155  
6.145  
6.135  
6.125  
6.115  
6.105  
6.095  
6.085  
6.075  
6.065  
6.055  
6.045  
6.035  
6.025  
6.015  
6.005  
5.995  
5.985  
5.975  
5.965  
5.955  
5.945  
5.935  
5.925  
5.915  
5.905  
5.895  
5.885  
5.875  
5.865  
5.855  
5.845  
5.835  
5.825  
5.815  
5.805  
5.795  
5.785  
5.775  
5.765  
5.755  
5.745  
5.735  
5.725  
5.715  
5.705  
5.695  
5.685  
5.675  
5.665  
5.655  
5.645  
5.635  
5.625  
5.615  
5.605  
5.595  
5.585  
5.575  
5.565  
5.555  
5.545  
5.535  
5.525  
5.515  
5.505  
5.495  
5.485  
5.475  
5.465  
5.455  
5.445  
5.435  
5.425  
5.415  
5.405  
5.395  
5.385  
5.375  
5.365  
5.355  
5.345  
5.335  
5.325  
5.315  
5.305  
5.295  
5.285  
5.275  
5.265  
5.255  
5.245  
5.235  
5.225  
5.215  
5.205  
5.195  
5.185  
5.175  
5.165  
5.155  
5.145  
5.135  
5.125  
5.115  
5.105  
5.095  
5.085  
5.075  
5.065  
5.055  
5.045  
5.035  
5.025  
5.015  
5.005  
4.995  
4.985  
4.975  
4.965  
4.955  
4.945  
4.935  
4.925  
4.915  
4.905  
4.895  
4.885  
4.875  
4.865  
4.855  
4.845  
4.835  
4.825  
4.815  
4.805  
4.795  
4.785  
4.775  
4.765  
4.755  
4.745  
4.735  
4.725  
4.715  
4.705  
4.695  
4.685  
4.675  
4.665  
4.655  
4.645  
4.635  
4.625  
4.615  
4.605  
4.595  
4.585  
4.575  
4.565  
4.555  
4.545  
4.535  
4.525  
4.515  
4.505  
4.495  
4.485  
4.475  
4.465  
4.455  
4.445  
4.435  
4.425  
4.415  
4.405  
4.395  
4.385  
4.375  
4.365  
4.355  
4.345  
4.335  
4.325  
4.315  
4.305  
4.295  
4.285  
4.275  
4.265  
4.255  
4.245  
4.235  
4.225  
4.215  
4.205  
4.195  
4.185  
4.175  
4.165  
4.155  
4.145  
4.135  
4.125  
4.115  
4.105  
4.095  
4.085  
4.075  
4.065  
4.055  
4.045  
4.035  
4.025  
4.015  
4.005  
3.995  
3.985  
3.975  
3.965  
3.955  
3.945  
3.935  
3.925  
3.915  
3.905  
3.895  
3.885  
3.875  
3.865  
3.855  
3.845  
3.835  
3.825  
3.815  
3.805  
3.795  
3.785  
3.775  
3.765  
3.755  
3.745  
3.735  
3.725  
3.715  
3.705  
3.695  
3.685  
3.675  
3.665  
3.655  
3.645  
3.635  
3.625  
3.615  
3.605  
3.595  
3.585  
3.575  
3.565  
3.555  
3.545  
3.535  
3.525  
3.515  
3.505  
3.495  
3.485  
3.475  
3.465  
3.455  
3.445  
3.435  
3.425  
3.415  
3.405  
3.395  
3.385  
3.375  
3.365  
3.355  
3.345  
3.335  
3.325  
3.315  
3.305  
3.295  
3.285  
3.275  
3.265  
3.255  
3.245  
3.235  
3.225  
3.215  
3.205  
3.195  
3.185  
3.175  
3.165  
3.155  
3.145  
3.135  
3.125  
3.115  
3.105  
3.095  
3.085  
3.075  
3.065  
3.055  
3.045  
3.035  
3.025  
3.015  
3.005  
2.995  
2.985  
2.975  
2.965  
2.955  
2.945  
2.935  
2.925  
2.915  
2.905  
2.895  
2.885  
2.875  
2.865  
2.855  
2.845  
2.835  
2.825  
2.815  
2.805  
2.795  
2.785  
2.775  
2.765  
2.755  
2.745  
2.735  
2.725  
2.715  
2.705  
2.695  
2.685  
2.675  
2.665  
2.655  
2.645  
2.635  
2.625  
2.615  
2.605  
2.595  
2.585  
2.575  
2.565  
2.555  
2.545  
2.535  
2.525  
2.515  
2.505  
2.495  
2.485  
2.475  
2.465  
2.455  
2.445  
2.435  
2.425  
2.415  
2.405  
2.395  
2.385  
2.375  
2.365  
2.355  
2.345  
2.335  
2.325  
2.315  
2.305  
2.295  
2.285  
2.275  
2.265  
2.255  
2.245  
2.235  
2.225  
2.215  
2.205  
2.195  
2.185  
2.175  
2.165  
2.155  
2.145  
2.135  
2.125  
2.115  
2.105  
2.095  
2.085  
2.075  
2.065  
2.055  
2.045  
2.035  
2.025  
2.015  
2.005  
1.995  
1.985  
1.975  
1.965  
1.955  
1.945  
1.935  
1.925  
1.915  
1.905  
1.895  
1.885  
1.875  
1.865  
1.855  
1.845  
1.835  
1.825  
1.815  
1.805  
1.795  
1.785  
1.775  
1.765  
1.755  
1.745  
1.735  
1.725  
1.715  
1.705  
1.695  
1.685  
1.675  
1.665  
1.655  
1.645  
1.635  
1.625  
1.615  
1.605  
1.595  
1.585  
1.575  
1.565  
1.555  
1.545  
1.535  
1.525  
1.515  
1.505  
1.495  
1.485  
1.475  
1.465  
1.455  
1.445  
1.435  
1.425  
1.415  
1.405  
1.395  
1.385  
1.375  
1.365  
1.355  
1.345  
1.335  
1.325  
1.315  
1.305  
1.295  
1.285  
1.275  
1.265  
1.255  
1.245  
1.235  
1.225  
1.215  
1.205  
1.195  
1.185  
1.175  
1.165  
1.155  
1.145  
1.135  
1.125  
1.115  
1.105  
1.095  
1.085  
1.075  
1.065  
1.055  
1.045  
1.035  
1.025  
1.015  
1.005  
0.995  
0.985  
0.975  
0.965  
0.955  
0.945  
0.935  
0.925  
0.915  
0.905  
0.895  
0.885  
0.875  
0.865  
0.855  
0.845  
0.835  
0.825  
0.815  
0.805  
0.795  
0.785  
0.775  
0.765  
0.755  
0.745  
0.735  
0.725  
0.715  
0.705  
0.695  
0.685  
0.675  
0.665  
0.655  
0.645  
0.635  
0.625  
0.615  
0.605  
0.595  
0.585  
0.575  
0.565  
0.555  
0.545  
0.535  
0.525  
0.515  
0.505  
0.495  
0.485  
0.475  
0.465  
0.455  
0.445  
0.435  
0.425  
0.415  
0.405  
0.395  
0.385  
0.375  
0.365  
0.355  
0.345  
0.335  
0.325  
0.315  
0.305  
0.295  
0.285  
0.275  
0.265  
0.255  
0.245  
0.235  
0.225  
0.215  
0.205  
0.195  
0.185  
0.175  
0.165  
0.155  
0.145  
0.135  
0.125  
0.115  
0.105  
0.095  
0.085  
0.075  
0.065  
0.055  
0.045  
0.035  
0.025  
0.015  
0.005  
-0.005  
-0.015  
-0.025  
-0.035  
-0.045  
-0.055  
-0.065  
-0.075  
-0.085  
-0.095  
-0.105  
-0.115  
-0.125  
-0.135  
-0.145  
-0.155  
-0.165  
-0.175  
-0.185  
-0.195  
-0.205  
-0.215  
-0.225  
-0.235  
-0.245  
-0.255  
-0.265  
-0.275  
-0.285  
-0.295  
-0.305  
-0.315  
-0.325  
-0.335  
-0.345  
-0.355  
-0.365  
-0.375  
-0.385  
-0.395  
-0.405  
-0.415  
-0.425  
-0.435  
-0.445  
-0.455  
-0.465  
-0.475  
-0.485  
-0.495  
-0.505  
-0.515  
-0.525  
-0.535  
-0.545  
-0.555  
-0.565  
-0.575  
-0.585  
-0.595  
-0.605  
-0.615  
-0.625  
-0.635  
-0.645  
-0.655  
-0.665  
-0.675  
-0.685  
-0.695  
-0.705  
-0.715  
-0.725  
-0.735  
-0.745  
-0.755  
-0.765  
-0.775  
-0.785  
-0.795  
-0.805  
-0.815  
-0.825  
-0.835  
-0.845  
-0.855  
-0.865  
-0.875  
-0.885  
-0.895  
-0.905  
-0.915  
-0.925  
-0.935  
-0.945  
-0.955  
-0.965  
-0.975  
-0.985  
-0.995

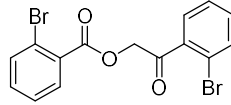

Current Data Parameters  
NAME 20190528 NMR  
600 YNU huang  
EXPNO 90  
PROCNO 1  
F2 - Acquisition Parameters  
Date\_ 20190528  
Time 21.54 h  
PROBHD Z114607\_0222 ( )  
TD 65536  
SOLVENT CDCl3  
NS 2  
DS 2  
RG 76.07  
D1 1.00000000 sec  
DS 2  
NS 2  
TD0 1  
SFO1 600.1737060 MHz  
NUC1 1H  
P1 10.00 usec  
PLW1 26.09399986 W  
F2 - Processing parameters  
SI 65536  
SF 600.1700155 MHz  
WDW EM  
SSB 0  
LB 0.30 Hz  
GB 0  
PC 1.00  
hm02086-1

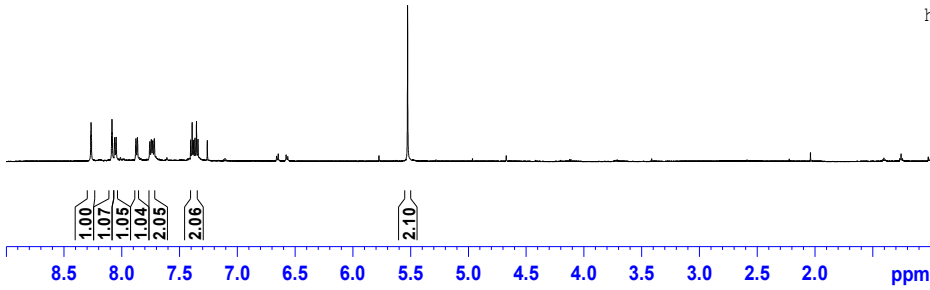

# <sup>13</sup>C-NMR (150 MHz, CDCl<sub>3</sub>)

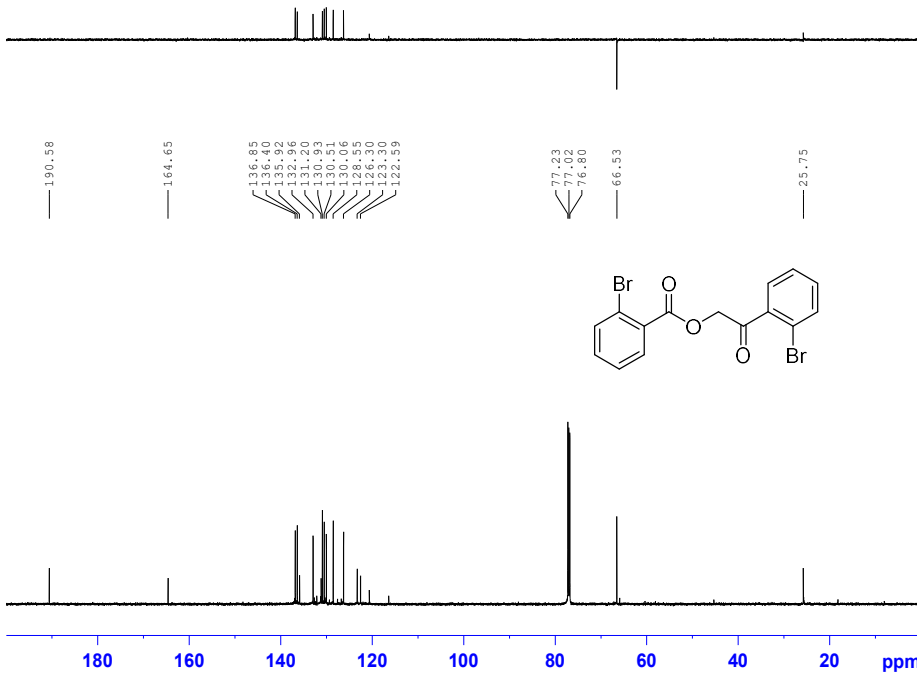

Current Data Parameters  
NAME 20190528 NMR  
600 YNU huang  
EXPNO 91  
PROCNO 1  
F2 - Acquisition Parameters  
Date\_ 20190528  
Time 22.33 h  
PROBHD Z114607\_0222 ( )  
TD 65536  
SOLVENT CDCl3  
NS 782  
DS 4  
RG 188.35  
D1 2.00000000 sec  
D11 0.03000000 sec  
DS 4  
NS 782  
TD0 1  
SFO1 150.9279578 MHz  
NUC1 13C  
P1 12.00 usec  
PLW1 97.67099762 W  
SFO2 600.1724007 MHz  
NUC2 1H  
CPDPRG[2] waltz16  
PCPD2 80.00 usec  
PLW2 26.09399986 W  
PLW12 0.40399119 W  
PLW13 0.20248041 W  
F2 - Processing parameters  
SI 32768  
SF 150.9128665 MHz  
WDW EM  
SSB 0  
LB 1.00 Hz  
GB 0  
PC 1.40  
hm02086-1

# <sup>1</sup>H-NMR (400 MHz, CDCl<sub>3</sub>)

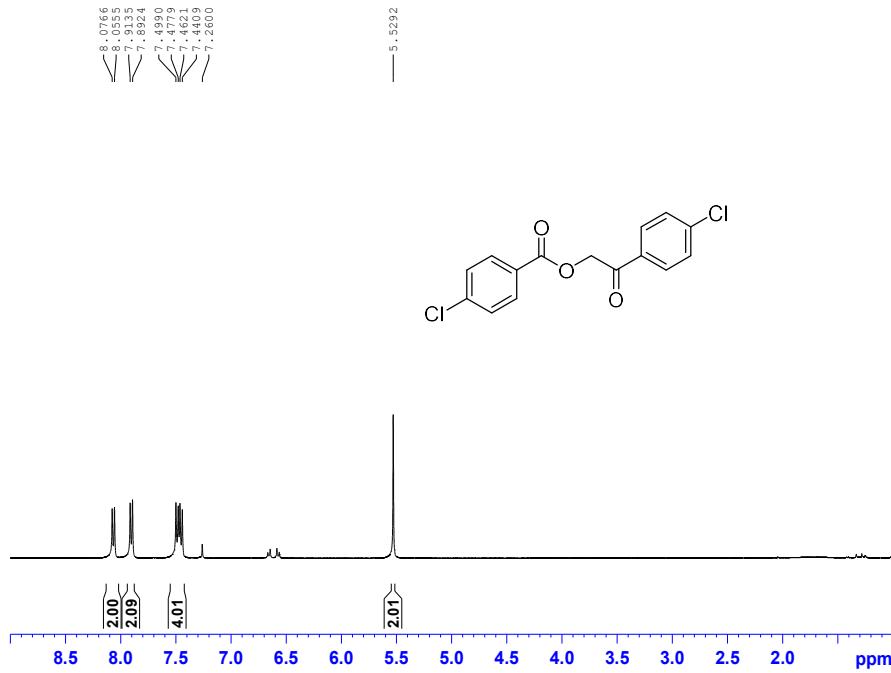

Current Data Parameters  
NAME bzhm02085  
EXPNO 1  
PROCNO 1

F2 - Acquisition Parameters  
Date\_ 20190526  
Time\_ 4.07  
INSTRUM spect  
PROBHD 5 mm PABBO BB/  
PULPROG zg  
TD 65536  
SOLVENT CDCl3  
NS 4  
DS 2  
SWH 8012.820 Hz  
FIDRES 0.122266 Hz  
AQ 4.0894465 sec  
RG 50.87  
DW 62.400 usec  
DE 6.50 usec  
TE 295.8 K  
D1 2.00000000 sec  
TD0 1

==== CHANNEL f1 =====  
SFO1 400.1318812 MHz  
NUC1 1H  
P1 12.00 usec  
PLW1 11.69999981 W

F2 - Processing parameters  
SI 65536  
SF 400.1300098 MHz  
WDW EM  
SSB 0  
LB 1.00 Hz  
GB 0  
PC 1.00

bzhm02085

# <sup>13</sup>C-NMR (150 MHz, CDCl<sub>3</sub>)

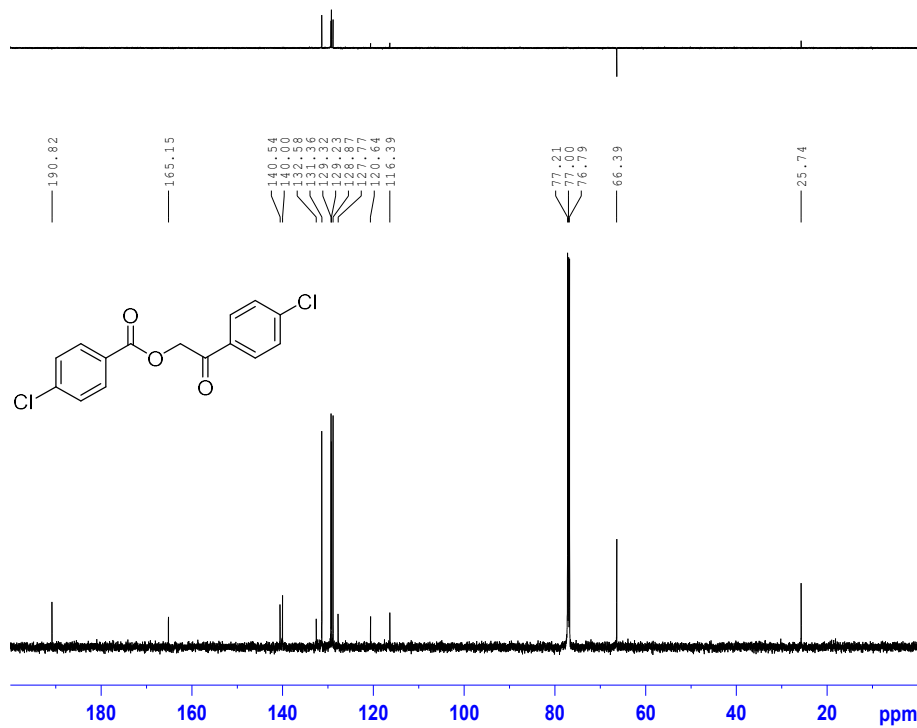

Current Data Parameters  
NAME 20190528 NMR  
EXPNO 121  
PROCNO 1

F2 - Acquisition Parameters  
Date\_ 20190529  
Time\_ 8.55 h  
PROBHD Z114607\_0222 ( )  
TD 65536  
SOLVENT CDCl3  
NS 240  
DS 4  
RG 188.35  
D1 2.00000000 sec  
D11 0.03000000 sec  
DS 4  
NS 240  
TD0 1  
SFO1 150.9279578 MHz  
NUC1 13C  
P1 12.00 usec  
PLW1 97.67099762 W  
SFO2 600.1724007 MHz  
NUC2 1H  
CPDPRG[2] waltz16  
PCPD2 80.00 usec  
PLW2 26.09399986 W  
PLW12 0.40399119 W  
PLW13 0.20248041 W

F2 - Processing parameters  
SI 32768  
SF 150.9128665 MHz  
WDW EM  
SSB 0  
LB 1.40 Hz  
GB 0  
PC 1.40

hm02085

# <sup>1</sup>H-NMR (400 MHz, CDCl<sub>3</sub>)

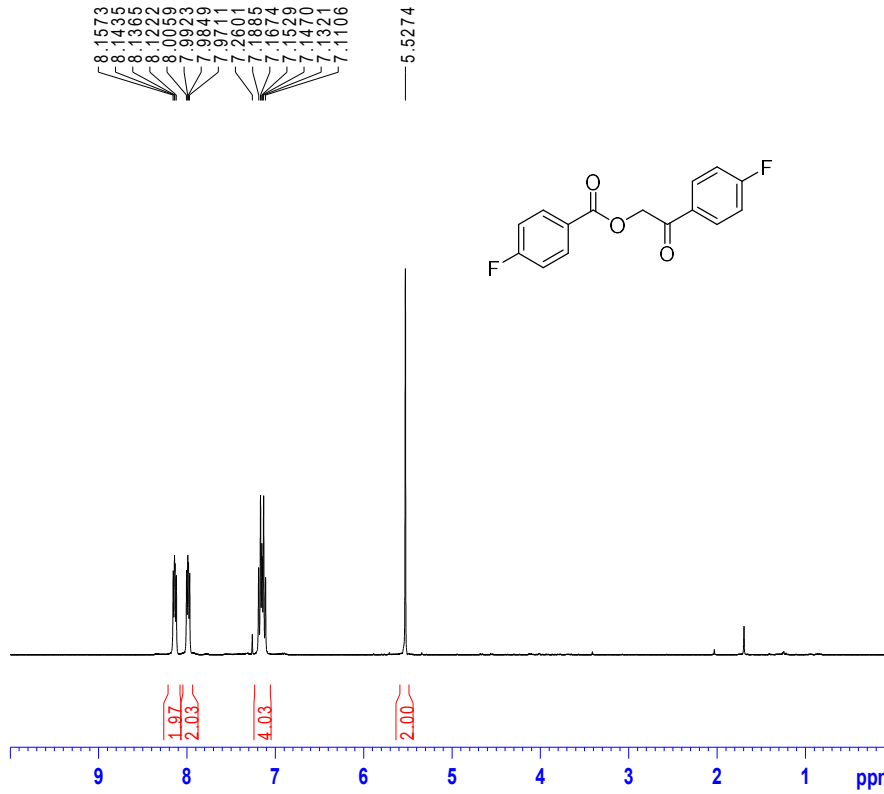

Current Data Parameters  
NAME 20190926 NMR 400 NEW YNU  
EXPNO 133  
PROCNO 1

F2 - Acquisition Parameters  
Date\_ 20190927  
Time 16.07 h  
INSTRUM Avance  
PROBHD Z116098\_0861 (  
PULPROG zg30  
TD 65536  
SOLVENT CDCl3  
NS 8  
DS 0  
SWH 5555.556 Hz  
FIDRES 0.169542 Hz  
AQ 5.8982401 sec  
RG 95.7854  
DW 90.000 usec  
DE 9.42 usec  
TE 296.3 K  
D1 1.0000000 sec  
TDD 1  
SFO1 400.1321847 MHz  
NUC1 1H  
P0 3.58 usec  
P1 10.75 usec  
PLW1 16.7199931 W

F2 - Processing parameters  
SI 65536  
SF 400.1300092 MHz  
WDW EM  
SSB 0  
LB 0.30 Hz  
GB 0  
PC 1.00

# <sup>13</sup>C-NMR (100 MHz, CDCl<sub>3</sub>)

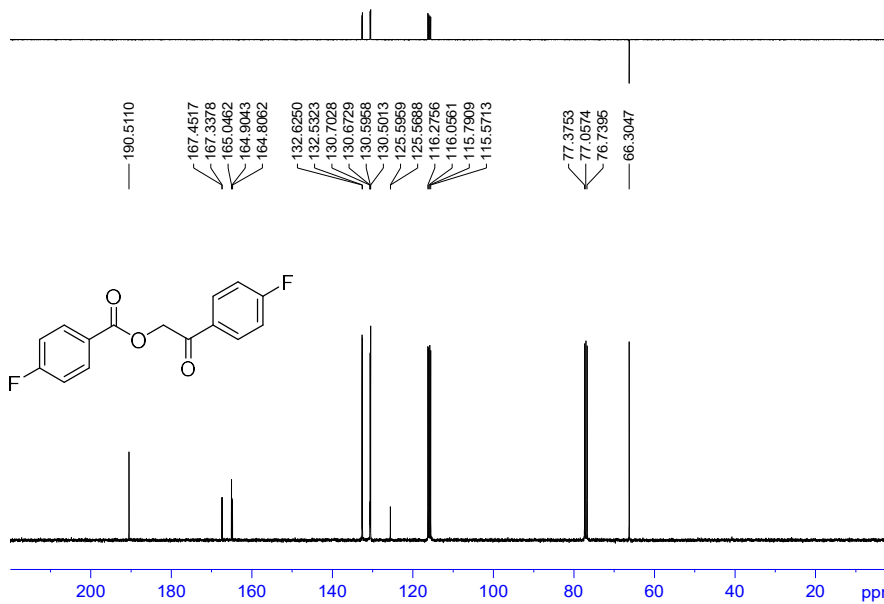

Current Data Parameters  
NAME 20190926 NMR 400 NEW YNU  
EXPNO 134  
PROCNO 1

F2 - Acquisition Parameters  
Date\_ 20190927  
Time 16.20 h  
INSTRUM Avance  
PROBHD Z116098\_0861 (  
PULPROG zgpg30  
TD 65536  
SOLVENT CDCl3  
NS 225  
DS 0  
SWH 25000.000 Hz  
FIDRES 0.762939 Hz  
AQ 1.3107200 sec  
RG 101  
EW 20.000 usec  
DE 6.50 usec  
TE 296.7 K  
D1 2.0000000 sec  
D11 0.03000000 sec  
TDD 1  
SFO1 100.6238359 MHz  
NUC1 13C  
P0 3.33 usec  
P1 10.00 usec  
PLW1 75.4179927 W  
SFO2 400.1316005 MHz  
NUC2 1H  
CPDPRG2 waltz165  
PCPD2 80.00 usec  
PLW2 16.7199931 W  
PLW12 0.34549999 W  
PLW13 0.17351000 W

F2 - Processing parameters  
SI 32768  
SF 100.6127685 MHz  
WDW EM  
SSB 0  
LB 1.00 Hz  
GB 0  
PC 1.40

# <sup>1</sup>H-NMR (300 MHz, CDCl<sub>3</sub>)

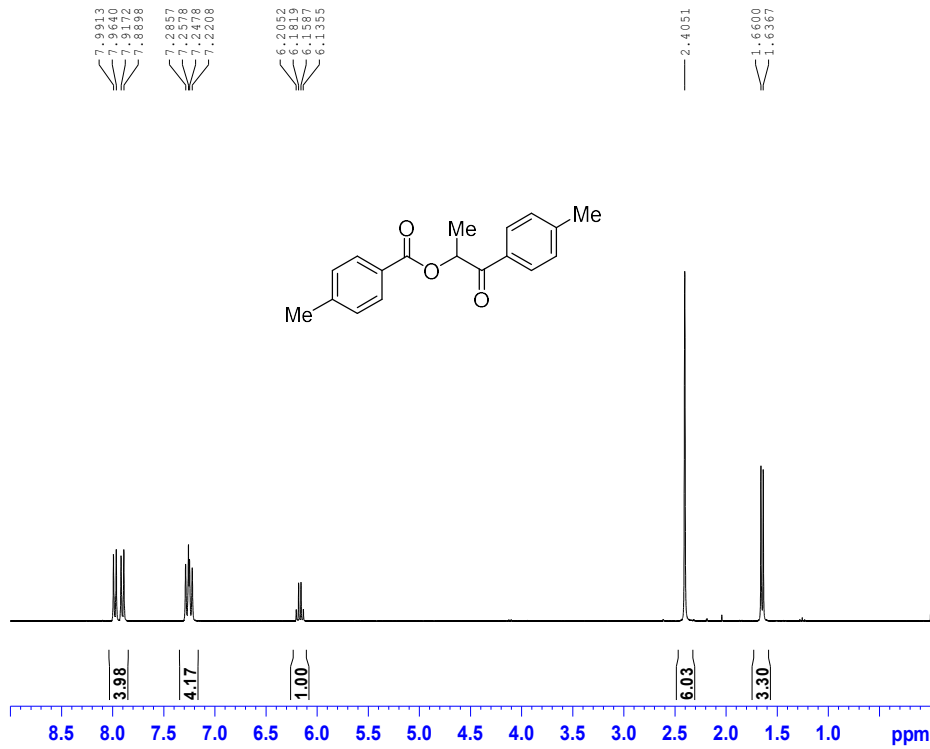

Current Data Parameters  
NAME 20181221-  
20190530 NMR 300 YNU  
EXPNO 488  
PROCNO 1

F2 - Acquisition Parameters  
Date\_ 20190315  
Time 2.32  
INSTRUM av300  
PROBHD 5 mm QNP 1H/13  
PULPROG zg30  
TD 65536  
SOLVENT CDCl3  
NS 8  
DS 0  
SWH 6172.839 Hz  
FIDRES 0.094190 Hz  
AQ 5.3084159 sec  
RG 181  
DW 81.000 usec  
DE 6.50 usec  
TE 294.3 K  
D1 1.0000000 sec  
TD0  
SFO1 300.1318534 MHz  
NUC1 1H  
P1 8.25 usec  
PLW1 -1.00000000 W

F2 - Processing parameters  
SI 32768  
SF 300.1300129 MHz  
WDW EM  
SSB 0  
LB 0.30 Hz  
GB 0  
PC 1.00

bzhm02023-1

# <sup>13</sup>C-NMR (125 MHz, CDCl<sub>3</sub>)

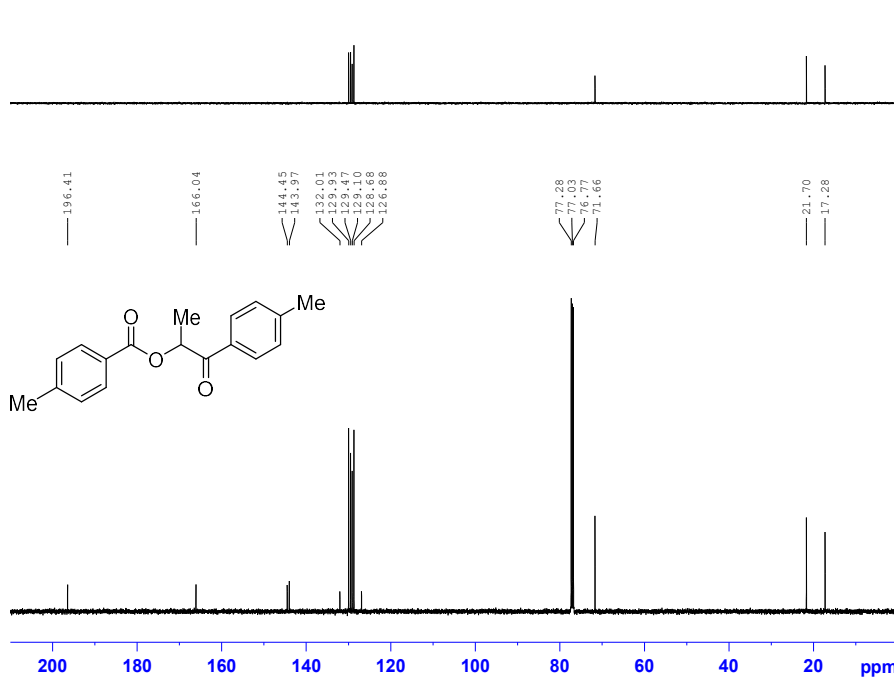

Current Data Parameters  
NAME 20210914-2 c nmr  
EXPNO 21  
PROCNO 1

F2 - Acquisition Parameters  
Date\_ 20210914  
Time 19.35 h  
INSTRUM spect  
PROBHD zll13652\_0230 ( )  
PULPROG zgpg30  
TD 65536  
SOLVENT CDCl3  
NS 159  
DS 4  
SWH 29761.904 Hz  
FIDRES 0.908261 Hz  
AQ 1.1010048 sec  
RG 190.79  
DW 16.800 usec  
DE 6.50 usec  
TE 298.4 K  
D1 2.0000000 sec  
D11 0.03000000 sec  
TD0 1  
SFO1 125.7703643 MHz  
NUC1 13C  
P1 10.00 usec  
PLW1 96.79299927 W  
SFO2 500.1320005 MHz  
NUC2 1H  
CPDPRG[2] waltz16  
PCPD2 80.00 usec  
PLW2 24.22500038 W  
PLW12 0.37852001 W  
PLW13 0.19039001 W

F2 - Processing parameters  
SI 32768  
SF 125.7577885 MHz  
WDW EM  
SSB 0  
LB 1.00 Hz  
GB 0  
PC 1.40

HM02023-1





## 5. DFT calculations

**DFT calculations of geometries and energies for all optimized starting materials, transition states, intermediates, and target materials**

Single Point Energy  $E_{M06}$  (in Hartree)

Zero-point correction ( $E_0$ , in Hartree)

Thermal correction to Enthalpy ( $H$ , in Hartree)

Thermal correction to Gibbs Free Energy ( $G$ , in Hartree)

Sum of electronic and zero-point Energies ( $E_{M06}+E_0$ , in Hartree)

Sum of electronic and thermal Enthalpies ( $E_{M06}+H$ , in Hartree)

Sum of electronic and thermal Free Energies ( $E_{M06}+G$ , in Hartree)

■ The single-point energies and solvent effects were computed at the M06-2X/def2-TZVP level

△ The single-point energies and solvent effects were computed at the M06-2X/def2-TZVP level

**Methods:** Gaussian program<sup>1</sup> was employed for DFT calculations, and /M06-2X/def2-SVP level was used for geometry optimization and frequency calculations. Frequency calculations were performed to ensure minimums were found. The single point calculations were at M06-2X/def2-TZVP level. The SMD implicit solvent model was used to take account of the solvation effect of water.

**Standard orientation, imaginary frequencies, thermodynamic energies and single-point energies of all stationary points.**

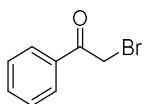

A Standard orientation:

| Center Number | Atomic Number | Atomic Type | Coordinates (Angstroms) |           |           |
|---------------|---------------|-------------|-------------------------|-----------|-----------|
|               |               |             | X                       | Y         | Z         |
| 1             | 6             | 0           | 3.477831                | 0.473945  | -0.603946 |
| 2             | 6             | 0           | 2.216356                | 1.059673  | -0.596556 |
| 3             | 6             | 0           | 1.161980                | 0.462069  | 0.107441  |
| 4             | 6             | 0           | 1.386682                | -0.731240 | 0.807521  |
| 5             | 6             | 0           | 2.652080                | -1.313692 | 0.801778  |
| 6             | 6             | 0           | 3.696379                | -0.714386 | 0.096494  |
| 7             | 1             | 0           | 4.293591                | 0.943344  | -1.155489 |
| 8             | 1             | 0           | 2.029960                | 1.988462  | -1.137252 |
| 9             | 1             | 0           | 0.582517                | -1.220107 | 1.358698  |
| 10            | 1             | 0           | 2.822820                | -2.241578 | 1.349077  |
| 11            | 1             | 0           | 4.685361                | -1.175566 | 0.093374  |
| 12            | 6             | 0           | -0.164554               | 1.150706  | 0.085211  |
| 13            | 8             | 0           | -0.304659               | 2.230759  | -0.448910 |
| 14            | 6             | 0           | -1.365758               | 0.482951  | 0.747584  |
| 15            | 1             | 0           | -1.072326               | -0.004179 | 1.683600  |
| 16            | 1             | 0           | -2.837531               | 1.874794  | -0.005544 |
| 17            | 35            | 0           | -1.876653               | -0.997663 | -0.456167 |

Zero-point correction= 0.158338 (Hartree/Particle)

Thermal correction to Energy= 0.168492

Thermal correction to Enthalpy= 0.169436

Thermal correction to Gibbs Free Energy= 0.121014

Sum of electronic and zero-point Energies= -2996.844625

Sum of electronic and thermal Energies= -2996.834471

Sum of electronic and thermal Enthalpies= -2996.833526

Sum of electronic and thermal Free Energies= -2996.881948

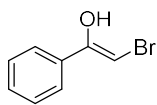

M1 Standard orientation:

| Center Number | Atomic Number | Atomic Type | Coordinates (Angstroms) |           |           |
|---------------|---------------|-------------|-------------------------|-----------|-----------|
|               |               |             | X                       | Y         | Z         |
| 1             | 6             | 0           | -3.314048               | 0.402462  | 0.770108  |
| 2             | 6             | 0           | -2.076094               | 1.036908  | 0.682278  |
| 3             | 6             | 0           | -1.051173               | 0.516807  | -0.120272 |
| 4             | 6             | 0           | -1.315172               | -0.635516 | -0.871832 |
| 5             | 6             | 0           | -2.560177               | -1.262260 | -0.803063 |
| 6             | 6             | 0           | -3.560971               | -0.752347 | 0.025408  |

|    |    |   |           |           |           |
|----|----|---|-----------|-----------|-----------|
| 7  | 1  | 0 | -4.092316 | 0.814535  | 1.415403  |
| 8  | 1  | 0 | -1.890818 | 1.957329  | 1.239385  |
| 9  | 1  | 0 | -0.540712 | -1.039218 | -1.525413 |
| 10 | 1  | 0 | -2.752339 | -2.152587 | -1.405106 |
| 11 | 1  | 0 | -4.531839 | -1.247712 | 0.083523  |
| 12 | 6  | 0 | 0.234775  | 1.305531  | -0.214340 |
| 13 | 8  | 0 | 0.081705  | 2.579779  | -0.355365 |
| 14 | 6  | 0 | 1.470024  | 0.703673  | -0.138001 |
| 15 | 1  | 0 | 3.327102  | 1.420310  | 0.730437  |
| 16 | 35 | 0 | 1.724777  | -1.161371 | 0.258375  |

-----

Zero-point correction= 0.144446 (Hartree/Particle)  
 Thermal correction to Energy= 0.154671  
 Thermal correction to Enthalpy= 0.155615  
 Thermal correction to Gibbs Free Energy= 0.107180  
 Sum of electronic and zero-point Energies= -2996.354856  
 Sum of electronic and thermal Energies= -2996.344632  
 Sum of electronic and thermal Enthalpies= -2996.343687  
 Sum of electronic and thermal Free Energies= -2996.392122

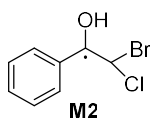

Standard orientation:

| Center Number | Atomic Number | Atomic Type | Coordinates (Angstroms) |           |           |
|---------------|---------------|-------------|-------------------------|-----------|-----------|
|               |               |             | X                       | Y         | Z         |
| 1             | 6             | 0           | -3.770588               | 0.507551  | 0.394721  |
| 2             | 6             | 0           | -2.524209               | 1.118025  | 0.449323  |
| 3             | 6             | 0           | -1.356451               | 0.421308  | 0.059615  |
| 4             | 6             | 0           | -1.494624               | -0.918263 | -0.372121 |
| 5             | 6             | 0           | -2.748090               | -1.517742 | -0.421302 |
| 6             | 6             | 0           | -3.893524               | -0.813850 | -0.042647 |
| 7             | 1             | 0           | -4.656736               | 1.069669  | 0.694514  |
| 8             | 1             | 0           | -2.442383               | 2.149598  | 0.789414  |
| 9             | 1             | 0           | -0.620346               | -1.499231 | -0.659527 |
| 10            | 1             | 0           | -2.829821               | -2.552792 | -0.757192 |
| 11            | 1             | 0           | -4.873214               | -1.291519 | -0.088032 |
| 12            | 6             | 0           | -0.083291               | 1.099442  | 0.140344  |
| 13            | 8             | 0           | -0.093839               | 2.262659  | 0.819996  |
| 14            | 6             | 0           | 1.213461                | 0.580414  | -0.327558 |
| 15            | 1             | 0           | 2.531673                | 1.880732  | 0.786639  |
| 16            | 35            | 0           | 1.781935                | -1.017847 | 0.853783  |
| 17            | 17            | 0           | 1.113806                | -0.047508 | -2.010481 |
| 18            | 1             | 0           | 0.727293                | 2.764506  | 0.705623  |

-----

Zero-point correction= 0.159406 (Hartree/Particle)  
 Thermal correction to Energy= 0.171064  
 Thermal correction to Enthalpy= 0.172008  
 Thermal correction to Gibbs Free Energy= 0.119970  
 Sum of electronic and zero-point Energies= -3456.848267

Sum of electronic and thermal Energies= -3456.836610  
 Sum of electronic and thermal Enthalpies= -3456.835665  
 Sum of electronic and thermal Free Energies= -3456.887703

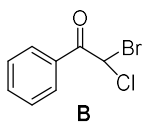

Standard orientation:

| Center Number | Atomic Number | Atomic Type | Coordinates (Angstroms) |           |           |
|---------------|---------------|-------------|-------------------------|-----------|-----------|
|               |               |             | X                       | Y         | Z         |
| 1             | 6             | 0           | 3.734925                | 0.541684  | -0.446020 |
| 2             | 6             | 0           | 2.471421                | 1.110777  | -0.561949 |
| 3             | 6             | 0           | 1.334047                | 0.423522  | -0.111416 |
| 4             | 6             | 0           | 1.484321                | -0.850873 | 0.457653  |
| 5             | 6             | 0           | 2.750966                | -1.418871 | 0.567902  |
| 6             | 6             | 0           | 3.876073                | -0.726707 | 0.118929  |
| 7             | 1             | 0           | 4.611602                | 1.088277  | -0.795938 |
| 8             | 1             | 0           | 2.350296                | 2.099982  | -1.004014 |
| 9             | 1             | 0           | 0.625273                | -1.413457 | 0.817489  |
| 10            | 1             | 0           | 2.858072                | -2.410755 | 1.008729  |
| 11            | 1             | 0           | 4.865834                | -1.176853 | 0.212251  |
| 12            | 6             | 0           | 0.027958                | 1.131216  | -0.295224 |
| 13            | 8             | 0           | -0.032914               | 2.190976  | -0.873373 |
| 14            | 6             | 0           | -1.307517               | 0.558299  | 0.240822  |
| 15            | 1             | 0           | -2.578922               | 1.752603  | -1.016692 |
| 16            | 35            | 0           | -1.684477               | -1.085288 | -0.775285 |
| 17            | 17            | 0           | -1.140351               | 0.191141  | 1.985596  |

Zero-point correction= 0.148703 (Hartree/Particle)  
 Thermal correction to Energy= 0.159929  
 Thermal correction to Enthalpy= 0.160873  
 Thermal correction to Gibbs Free Energy= 0.109728  
 Sum of electronic and zero-point Energies= -3456.292158  
 Sum of electronic and thermal Energies= -3456.280932  
 Sum of electronic and thermal Enthalpies= -3456.279988  
 Sum of electronic and thermal Free Energies= -3456.331133

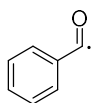

Standard orientation:

| Center Number | Atomic Number | Atomic Type | Coordinates (Angstroms) |           |          |
|---------------|---------------|-------------|-------------------------|-----------|----------|
|               |               |             | X                       | Y         | Z        |
| 1             | 6             | 0           | 1.268769                | 1.335045  | 0.000000 |
| 2             | 6             | 0           | -0.099907               | 1.090144  | 0.000000 |
| 3             | 6             | 0           | -0.559554               | -0.236145 | 0.000000 |

|    |   |   |           |           |          |
|----|---|---|-----------|-----------|----------|
| 4  | 6 | 0 | 0.339201  | -1.307527 | 0.000000 |
| 5  | 6 | 0 | 1.708961  | -1.053284 | 0.000000 |
| 6  | 6 | 0 | 2.169174  | 0.264600  | 0.000000 |
| 7  | 1 | 0 | 1.639817  | 2.360909  | 0.000000 |
| 8  | 1 | 0 | -0.820719 | 1.909923  | 0.000000 |
| 9  | 1 | 0 | -0.045636 | -2.329075 | 0.000000 |
| 10 | 1 | 0 | 2.418163  | -1.881793 | 0.000000 |
| 11 | 1 | 0 | 3.242583  | 0.461764  | 0.000000 |
| 12 | 6 | 0 | -2.009494 | -0.512125 | 0.000000 |
| 13 | 8 | 0 | -2.917138 | 0.249253  | 0.000000 |

Zero-point correction= 0.098664 (Hartree/Particle)

Thermal correction to Energy= 0.104923

Thermal correction to Enthalpy= 0.105867

Thermal correction to Gibbs Free Energy= 0.067472

Sum of electronic and zero-point Energies= -344.419147

Sum of electronic and thermal Energies= -344.412888

Sum of electronic and thermal Enthalpies= -344.411944

Sum of electronic and thermal Free Energies= -344.450339

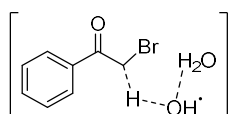

M5 (HAT)

Standard orientation:

| Center Number | Atomic Number | Atomic Type | Coordinates (Angstroms) |           |           |
|---------------|---------------|-------------|-------------------------|-----------|-----------|
|               |               |             | X                       | Y         | Z         |
| 1             | 6             | 0           | 4.022685                | 0.239000  | -0.081796 |
| 2             | 6             | 0           | 2.868538                | 0.987589  | 0.122419  |
| 3             | 6             | 0           | 1.630803                | 0.347160  | 0.275742  |
| 4             | 6             | 0           | 1.561660                | -1.052141 | 0.229858  |
| 5             | 6             | 0           | 2.721113                | -1.798319 | 0.032063  |
| 6             | 6             | 0           | 3.949031                | -1.155053 | -0.127056 |
| 7             | 1             | 0           | 4.982990                | 0.741014  | -0.206911 |
| 8             | 1             | 0           | 2.910017                | 2.076866  | 0.162353  |
| 9             | 1             | 0           | 0.612827                | -1.572582 | 0.361765  |
| 10            | 1             | 0           | 2.664479                | -2.886973 | 0.001896  |
| 11            | 1             | 0           | 4.854576                | -1.742526 | -0.287431 |
| 12            | 6             | 0           | 0.434118                | 1.204535  | 0.510924  |
| 13            | 8             | 0           | 0.532490                | 2.390475  | 0.738407  |
| 14            | 6             | 0           | -0.966038               | 0.594347  | 0.464091  |
| 15            | 1             | 0           | -0.968770               | -0.407169 | 1.058319  |
| 17            | 1             | 0           | -2.119161               | 2.415108  | 0.407857  |
| 18            | 35            | 0           | -1.325426               | 0.019271  | -1.366053 |
| 19            | 1             | 0           | -3.120705               | -1.447253 | 1.065315  |
| 20            | 8             | 0           | -3.953998               | -1.280848 | 0.590234  |
| 21            | 1             | 0           | -3.665425               | -1.164141 | -0.324179 |
| 22            | 8             | 0           | -1.384511               | -1.539974 | 1.842401  |
| 23            | 1             | 0           | -1.479612               | -1.072615 | 2.698958  |

Zero-point correction= 0.189710 (Hartree/Particle)  
 Thermal correction to Energy= 0.205051  
 Thermal correction to Enthalpy= 0.205996  
 Thermal correction to Gibbs Free Energy= 0.145352  
 Sum of electronic and zero-point Energies= -3148.800360  
 Sum of electronic and thermal Energies= -3148.785019  
 Sum of electronic and thermal Enthalpies= -3148.784075  
 Sum of electronic and thermal Free Energies= -3148.844718

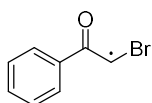

**M6** Standard orientation:

| Center Number | Atomic Number | Atomic Type | Coordinates (Angstroms) |           |           |
|---------------|---------------|-------------|-------------------------|-----------|-----------|
|               |               |             | X                       | Y         | Z         |
| 1             | 6             | 0           | 3.747070                | 0.328701  | -0.458234 |
| 2             | 6             | 0           | 2.497608                | 0.923816  | -0.602798 |
| 3             | 6             | 0           | 1.332552                | 0.322735  | -0.100439 |
| 4             | 6             | 0           | 1.463420                | -0.907264 | 0.551520  |
| 5             | 6             | 0           | 2.716133                | -1.516189 | 0.689937  |
| 6             | 6             | 0           | 3.862309                | -0.903578 | 0.191035  |
| 7             | 1             | 0           | 4.635696                | 0.824639  | -0.853891 |
| 8             | 1             | 0           | 2.405393                | 1.880098  | -1.121578 |
| 9             | 1             | 0           | 0.593298                | -1.413662 | 0.963582  |
| 10            | 1             | 0           | 2.789095                | -2.480186 | 1.197572  |
| 11            | 1             | 0           | 4.838031                | -1.379370 | 0.305589  |
| 12            | 6             | 0           | 0.029506                | 1.120545  | -0.387957 |
| 13            | 8             | 0           | -0.116414               | 1.420920  | -1.652831 |
| 14            | 6             | 0           | -1.300674               | 0.455608  | 0.188597  |
| 15            | 1             | 0           | -2.576315               | 1.495622  | -1.169925 |
| 16            | 35            | 0           | -1.642292               | -1.290724 | -0.675001 |
| 17            | 1             | 0           | -0.237109               | 3.003167  | -0.119938 |

Zero-point correction= 0.162515 (Hartree/Particle)  
 Thermal correction to Energy= 0.174932  
 Thermal correction to Enthalpy= 0.175876  
 Thermal correction to Gibbs Free Energy= 0.123156  
 Sum of electronic and zero-point Energies= -3532.140751  
 Sum of electronic and thermal Energies= -3532.128334  
 Sum of electronic and thermal Enthalpies= -3532.127390  
 Sum of electronic and thermal Free Energies= -3532.180110

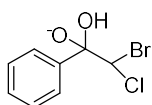

**M7** Standard orientation:

| Center Number | Atomic Number | Atomic Type | Coordinates (Angstroms) |   |   |
|---------------|---------------|-------------|-------------------------|---|---|
|               |               |             | X                       | Y | Z |

|    |    |   |           |           |           |
|----|----|---|-----------|-----------|-----------|
| 1  | 6  | 0 | 3.817764  | 0.161236  | -0.506764 |
| 2  | 6  | 0 | 2.620738  | 0.809102  | -0.807358 |
| 3  | 6  | 0 | 1.406613  | 0.327389  | -0.303283 |
| 4  | 6  | 0 | 1.397532  | -0.833932 | 0.481414  |
| 5  | 6  | 0 | 2.594823  | -1.488948 | 0.766154  |
| 6  | 6  | 0 | 3.805959  | -0.990326 | 0.281414  |
| 7  | 1  | 0 | 4.760869  | 0.551978  | -0.892727 |
| 8  | 1  | 0 | 2.619333  | 1.701898  | -1.435454 |
| 9  | 1  | 0 | 0.440641  | -1.231384 | 0.825504  |
| 10 | 1  | 0 | 2.583479  | -2.399638 | 1.367818  |
| 11 | 1  | 0 | 4.740407  | -1.504407 | 0.513466  |
| 12 | 6  | 0 | 0.150926  | 1.047223  | -0.702989 |
| 13 | 8  | 0 | 0.065962  | 1.513644  | -1.851842 |
| 14 | 8  | 0 | -0.935540 | 1.234271  | 0.219487  |
| 15 | 6  | 0 | -2.160656 | 1.978250  | -0.169521 |
| 16 | 1  | 0 | -3.024937 | 1.595600  | 0.387067  |
| 17 | 35 | 0 | -2.085973 | -1.354491 | -0.372140 |
| 18 | 17 | 0 | -0.672811 | 1.071525  | 1.924610  |

Zero-point correction= 0.146112 (Hartree/Particle)

Thermal correction to Energy= 0.158464

Thermal correction to Enthalpy= 0.159409

Thermal correction to Gibbs Free Energy= 0.104463

Sum of electronic and zero-point Energies= -3456.412566

Sum of electronic and thermal Energies= -3456.400214

Sum of electronic and thermal Enthalpies= -3456.399270

Sum of electronic and thermal Free Energies= -3456.454215

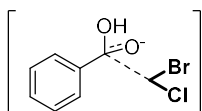

M8

Standard orientation:

| Center Number | Atomic Number | Atomic Type | Coordinates (Angstroms) |           |           |
|---------------|---------------|-------------|-------------------------|-----------|-----------|
|               |               |             | X                       | Y         | Z         |
| 1             | 6             | 0           | 2.722365                | -0.484265 | 1.438456  |
| 2             | 6             | 0           | 1.979743                | 0.618060  | 1.014177  |
| 3             | 6             | 0           | 1.507173                | 0.678216  | -0.300966 |
| 4             | 6             | 0           | 1.796338                | -0.363640 | -1.188749 |
| 5             | 6             | 0           | 2.533710                | -1.462564 | -0.762599 |
| 6             | 6             | 0           | 2.998493                | -1.525948 | 0.553396  |
| 7             | 1             | 0           | 3.094466                | -0.523231 | 2.463646  |
| 8             | 1             | 0           | 1.790634                | 1.436705  | 1.710272  |
| 9             | 1             | 0           | 1.421576                | -0.306791 | -2.211593 |
| 10            | 1             | 0           | 2.746885                | -2.276849 | -1.457264 |
| 11            | 1             | 0           | 3.580690                | -2.387043 | 0.886677  |
| 12            | 6             | 0           | 0.760494                | 1.863931  | -0.817802 |
| 13            | 8             | 0           | 0.731963                | 2.156957  | -1.996969 |
| 14            | 8             | 0           | -1.448309               | 0.407560  | -0.131736 |



|    |    |   |           |           |           |
|----|----|---|-----------|-----------|-----------|
| 15 | 1  | 0 | -3.670082 | 0.326740  | 0.067041  |
| 16 | 1  | 0 | -2.949629 | 1.907285  | -0.359084 |
| 17 | 35 | 0 | -1.382322 | -1.602437 | -0.299041 |
| 18 | 17 | 0 | -1.343102 | 0.734201  | 1.736445  |
| 19 | 6  | 0 | 0.301989  | 2.750860  | 0.087865  |

-----  
Zero-point correction= 0.159869 (Hartree/Particle)  
Thermal correction to Energy= 0.172875  
Thermal correction to Enthalpy= 0.173819  
Thermal correction to Gibbs Free Energy= 0.117823  
Sum of electronic and zero-point Energies= -3532.108983  
Sum of electronic and thermal Energies= -3532.095977  
Sum of electronic and thermal Enthalpies= -3532.095032  
Sum of electronic and thermal Free Energies= -3532.151028

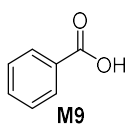

Standard orientation:

| Center Number | Atomic Number | Atomic Type | Coordinates (Angstroms) |           |           |
|---------------|---------------|-------------|-------------------------|-----------|-----------|
|               |               |             | X                       | Y         | Z         |
| 1             | 6             | 0           | -1.836728               | 1.235735  | -0.000052 |
| 2             | 6             | 0           | -0.444006               | 1.202843  | -0.000095 |
| 3             | 6             | 0           | 0.219012                | -0.029527 | -0.000028 |
| 4             | 6             | 0           | -0.510420               | -1.223463 | 0.000080  |
| 5             | 6             | 0           | -1.901906               | -1.185179 | 0.000053  |
| 6             | 6             | 0           | -2.564079               | 0.044276  | 0.000023  |
| 7             | 1             | 0           | -2.357900               | 2.193929  | -0.000099 |
| 8             | 1             | 0           | 0.129471                | 2.129877  | -0.000189 |
| 9             | 1             | 0           | 0.024348                | -2.174279 | 0.000082  |
| 10            | 1             | 0           | -2.473239               | -2.114387 | 0.000078  |
| 11            | 1             | 0           | -3.654928               | 0.073785  | 0.000035  |
| 12            | 6             | 0           | 1.706541                | -0.114259 | -0.000007 |
| 13            | 8             | 0           | 2.325716                | -1.154471 | -0.000152 |
| 14            | 8             | 0           | 2.305835                | 1.075773  | 0.000179  |
| 15            | 1             | 0           | 3.269360                | 0.938091  | 0.000038  |

-----  
Zero-point correction= 0.116781 (Hartree/Particle)  
Thermal correction to Energy= 0.123817  
Thermal correction to Enthalpy= 0.124761  
Thermal correction to Gibbs Free Energy= 0.084814  
Sum of electronic and zero-point Energies= -420.236407  
Sum of electronic and thermal Energies= -420.229371  
Sum of electronic and thermal Enthalpies= -420.228427  
Sum of electronic and thermal Free Energies= -420.268375

CHBrCl

M10 Standard orientation:

| Center Number | Atomic Number | Atomic Type | Coordinates (Angstroms) |           |           |
|---------------|---------------|-------------|-------------------------|-----------|-----------|
|               |               |             | X                       | Y         | Z         |
| 1             | 6             | 0           | -0.586512               | 0.416229  | 0.443946  |
| 2             | 1             | 0           | -0.166776               | 2.502954  | 0.211111  |
| 3             | 35            | 0           | 1.219050                | -0.174563 | -0.031444 |
| 4             | 17            | 0           | -1.781906               | -0.805118 | -0.074563 |

Zero-point correction= 0.057215 (Hartree/Particle)  
 Thermal correction to Energy= 0.062156  
 Thermal correction to Enthalpy= 0.063100  
 Thermal correction to Gibbs Free Energy= 0.027507  
 Sum of electronic and zero-point Energies= -3112.390793  
 Sum of electronic and thermal Energies= -3112.385852  
 Sum of electronic and thermal Enthalpies= -3112.384908  
 Sum of electronic and thermal Free Energies= -3112.420501

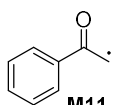

M11 Standard orientation:

| Center Number | Atomic Number | Atomic Type | Coordinates (Angstroms) |           |           |
|---------------|---------------|-------------|-------------------------|-----------|-----------|
|               |               |             | X                       | Y         | Z         |
| 1             | 6             | 0           | 2.482951                | 1.010446  | 0.080407  |
| 2             | 6             | 0           | 1.103742                | 1.195457  | 0.062222  |
| 3             | 6             | 0           | 0.237213                | 0.096121  | -0.010039 |
| 4             | 6             | 0           | 0.778390                | -1.195310 | -0.073254 |
| 5             | 6             | 0           | 2.160527                | -1.379069 | -0.059825 |
| 6             | 6             | 0           | 3.014823                | -0.279235 | 0.019661  |
| 7             | 1             | 0           | 3.147192                | 1.874020  | 0.139999  |
| 8             | 1             | 0           | 0.679347                | 2.199030  | 0.106722  |
| 9             | 1             | 0           | 0.131879                | -2.070312 | -0.143690 |
| 10            | 1             | 0           | 2.570371                | -2.388746 | -0.113939 |
| 11            | 1             | 0           | 4.095922                | -0.427208 | 0.032258  |
| 12            | 6             | 0           | -1.239451               | 0.371430  | -0.032934 |
| 13            | 8             | 0           | -1.641993               | 1.537839  | -0.149381 |
| 14            | 6             | 0           | -2.173775               | -0.716608 | 0.094845  |
| 15            | 1             | 0           | -4.088685               | -1.114305 | -0.742138 |
| 16            | 1             | 0           | -4.099094               | -0.831619 | 0.993861  |

Zero-point correction= 0.154471 (Hartree/Particle)  
 Thermal correction to Energy= 0.163555  
 Thermal correction to Enthalpy= 0.164499  
 Thermal correction to Gibbs Free Energy= 0.118696  
 Sum of electronic and zero-point Energies= -422.906952  
 Sum of electronic and thermal Energies= -422.897868  
 Sum of electronic and thermal Enthalpies= -422.896924  
 Sum of electronic and thermal Free Energies= -422.942727

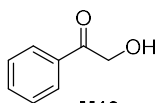

**M12** Standard orientation:

| Center Number | Atomic Number | Atomic Type | Coordinates (Angstroms) |           |           |
|---------------|---------------|-------------|-------------------------|-----------|-----------|
|               |               |             | X                       | Y         | Z         |
| 1             | 6             | 0           | 2.768014                | -0.935258 | 0.301830  |
| 2             | 6             | 0           | 1.407795                | -1.221217 | 0.253424  |
| 3             | 6             | 0           | 0.488006                | -0.221999 | -0.094073 |
| 4             | 6             | 0           | 0.946084                | 1.066721  | -0.400256 |
| 5             | 6             | 0           | 2.310238                | 1.348553  | -0.355633 |
| 6             | 6             | 0           | 3.219891                | 0.350680  | -0.004618 |
| 7             | 1             | 0           | 3.479525                | -1.715069 | 0.576709  |
| 8             | 1             | 0           | 1.039210                | -2.221004 | 0.487083  |
| 9             | 1             | 0           | 0.248408                | 1.856233  | -0.682401 |
| 10            | 1             | 0           | 2.663962                | 2.351171  | -0.599100 |
| 11            | 1             | 0           | 4.287367                | 0.574846  | 0.029572  |
| 12            | 6             | 0           | -0.956574               | -0.584801 | -0.144550 |
| 13            | 8             | 0           | -1.321710               | -1.743130 | -0.061382 |
| 14            | 6             | 0           | -2.020346               | 0.503887  | -0.241876 |
| 15            | 1             | 0           | -1.180758               | 1.756890  | 1.348601  |
| 17            | 1             | 0           | -1.741921               | 1.211279  | -1.037504 |
| 18            | 8             | 0           | -3.252258               | -0.081400 | -0.590790 |
| 19            | 1             | 0           | -3.208898               | -1.003515 | -0.287366 |

Zero-point correction= 0.172953 (Hartree/Particle)

Thermal correction to Energy= 0.183003

Thermal correction to Enthalpy= 0.183948

Thermal correction to Gibbs Free Energy= 0.137052

Sum of electronic and zero-point Energies= -498.678195

Sum of electronic and thermal Energies= -498.668145

Sum of electronic and thermal Enthalpies= -498.667201

Sum of electronic and thermal Free Energies= -498.714097

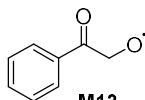

**M13** Standard orientation:

| Center Number | Atomic Number | Atomic Type | Coordinates (Angstroms) |           |           |
|---------------|---------------|-------------|-------------------------|-----------|-----------|
|               |               |             | X                       | Y         | Z         |
| 1             | 6             | 0           | 2.727771                | -0.915925 | 0.295505  |
| 2             | 6             | 0           | 1.371466                | -1.216720 | 0.235887  |
| 3             | 6             | 0           | 0.441799                | -0.224236 | -0.106365 |
| 4             | 6             | 0           | 0.886520                | 1.073394  | -0.392975 |
| 5             | 6             | 0           | 2.247115                | 1.369591  | -0.335272 |
| 6             | 6             | 0           | 3.166707                | 0.378580  | 0.008283  |
| 7             | 1             | 0           | 3.445747                | -1.691525 | 0.565329  |

|    |   |   |           |           |           |
|----|---|---|-----------|-----------|-----------|
| 8  | 1 | 0 | 1.013149  | -2.222856 | 0.456946  |
| 9  | 1 | 0 | 0.185990  | 1.862686  | -0.667392 |
| 10 | 1 | 0 | 2.589586  | 2.379761  | -0.562785 |
| 11 | 1 | 0 | 4.231169  | 0.614838  | 0.052099  |
| 12 | 6 | 0 | -0.996347 | -0.627213 | -0.152141 |
| 13 | 8 | 0 | -1.339301 | -1.783370 | -0.062348 |
| 14 | 6 | 0 | -2.056126 | 0.497056  | -0.249917 |
| 15 | 1 | 0 | -1.262850 | 1.647288  | 1.425094  |
| 16 | 1 | 0 | -1.713144 | 1.210912  | -1.019111 |
| 17 | 8 | 0 | -3.231446 | -0.103869 | -0.654252 |

Zero-point correction= 0.156890 (Hartree/Particle)

Thermal correction to Energy= 0.166511

Thermal correction to Enthalpy= 0.167455

Thermal correction to Gibbs Free Energy= 0.120704

Sum of electronic and zero-point Energies= -498.009657

Sum of electronic and thermal Energies= -498.000036

Sum of electronic and thermal Enthalpies= -497.999092

Sum of electronic and thermal Free Energies= -498.045843

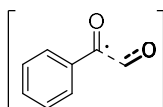

M14 (Bz-release) Standard orientation:

| Center Number | Atomic Number | Atomic Type | Coordinates (Angstroms) |           |           |
|---------------|---------------|-------------|-------------------------|-----------|-----------|
|               |               |             | X                       | Y         | Z         |
| 1             | 6             | 0           | -2.860358               | 0.823331  | 0.229428  |
| 2             | 6             | 0           | -1.531293               | 1.227069  | 0.191495  |
| 3             | 6             | 0           | -0.528181               | 0.284247  | -0.089122 |
| 4             | 6             | 0           | -0.856454               | -1.054266 | -0.334627 |
| 5             | 6             | 0           | -2.191523               | -1.446918 | -0.296085 |
| 6             | 6             | 0           | -3.189088               | -0.512718 | -0.013418 |
| 7             | 1             | 0           | -3.643444               | 1.550557  | 0.447014  |
| 8             | 1             | 0           | -1.254137               | 2.265419  | 0.379495  |
| 9             | 1             | 0           | -0.084310               | -1.791259 | -0.553960 |
| 10            | 1             | 0           | -2.452573               | -2.488110 | -0.487496 |
| 11            | 1             | 0           | -4.233170               | -0.828400 | 0.016557  |
| 12            | 6             | 0           | 0.860896                | 0.788410  | -0.102602 |
| 13            | 8             | 0           | 1.257838                | 1.887884  | 0.025122  |
| 14            | 6             | 0           | 2.347758                | -0.578878 | -0.307445 |
| 15            | 8             | 0           | 3.322641                | 0.096718  | -0.698529 |

Zero-point correction= 0.156743 (Hartree/Particle)

Thermal correction to Energy= 0.166729

Thermal correction to Enthalpy= 0.167673

Thermal correction to Gibbs Free Energy= 0.119904

Sum of electronic and zero-point Energies= -498.000007

Sum of electronic and thermal Energies= -497.990021

Sum of electronic and thermal Enthalpies= -497.989077

Sum of electronic and thermal Free Energies= -498.036846

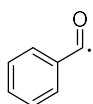

**M15** Standard orientation:

| Center Number | Atomic Number | Atomic Type | Coordinates (Angstroms) |           |           |
|---------------|---------------|-------------|-------------------------|-----------|-----------|
|               |               |             | X                       | Y         | Z         |
| 1             | 6             | 0           | 1.828668                | 1.208071  | 0.000045  |
| 2             | 6             | 0           | 0.433854                | 1.205681  | 0.000043  |
| 3             | 6             | 0           | -0.275007               | 0.000017  | -0.000001 |
| 4             | 6             | 0           | 0.434033                | -1.205725 | -0.000047 |
| 5             | 6             | 0           | 1.828676                | -1.208057 | -0.000051 |
| 6             | 6             | 0           | 2.528595                | 0.000084  | -0.000002 |
| 7             | 1             | 0           | 2.373521                | 2.153947  | 0.000082  |
| 8             | 1             | 0           | -0.122960               | 2.143679  | 0.000072  |
| 9             | 1             | 0           | -0.122914               | -2.143659 | -0.000083 |
| 10            | 1             | 0           | 2.373675                | -2.153850 | -0.000091 |
| 11            | 1             | 0           | 3.620084                | 0.000172  | -0.000002 |
| 12            | 6             | 0           | -1.805690               | -0.000122 | 0.000001  |
| 13            | 8             | 0           | -2.372419               | -1.116446 | -0.000010 |

Zero-point correction= 0.104108 (Hartree/Particle)

Thermal correction to Energy= 0.110869

Thermal correction to Enthalpy= 0.111813

Thermal correction to Gibbs Free Energy= 0.072283

Sum of electronic and zero-point Energies= -419.781501

Sum of electronic and thermal Energies= -419.774739

Sum of electronic and thermal Enthalpies= -419.773795

Sum of electronic and thermal Free Energies= -419.813326

C1 (HCHO)

**M16** Standard orientation:

| Center Number | Atomic Number | Atomic Type | Coordinates (Angstroms) |           |           |
|---------------|---------------|-------------|-------------------------|-----------|-----------|
|               |               |             | X                       | Y         | Z         |
| 1             | 6             | 0           | 1.160175                | -0.151889 | -0.000023 |
| 2             | 1             | 0           | 1.695389                | 0.227765  | 0.883543  |
| 3             | 1             | 0           | 1.144703                | -1.248338 | -0.000142 |
| 4             | 8             | 0           | -1.230589               | -0.274916 | -0.000004 |

Zero-point correction= 0.055942 (Hartree/Particle)

Thermal correction to Energy= 0.059782

Thermal correction to Enthalpy= 0.060726

Thermal correction to Gibbs Free Energy= 0.031099

Sum of electronic and zero-point Energies= -153.586213

Sum of electronic and thermal Energies= -153.582372

Sum of electronic and thermal Enthalpies= -153.581428  
 Sum of electronic and thermal Free Energies= -153.611055

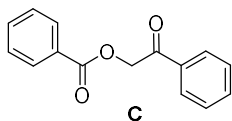

Standard orientation:

| Center Number | Atomic Number | Atomic Type | Coordinates (Angstroms) |           |           |
|---------------|---------------|-------------|-------------------------|-----------|-----------|
|               |               |             | X                       | Y         | Z         |
| 1             | 6             | 0           | -2.795722               | 2.482452  | 0.871441  |
| 2             | 6             | 0           | -2.758426               | 1.092882  | 0.925799  |
| 3             | 6             | 0           | -2.138604               | 0.364396  | -0.097781 |
| 4             | 6             | 0           | -1.566926               | 1.038470  | -1.185154 |
| 5             | 6             | 0           | -1.618619               | 2.430396  | -1.242180 |
| 6             | 6             | 0           | -2.225690               | 3.152065  | -0.213951 |
| 7             | 1             | 0           | -3.271368               | 3.046158  | 1.675301  |
| 8             | 1             | 0           | -3.203222               | 0.555531  | 1.764968  |
| 9             | 1             | 0           | -1.090401               | 0.484495  | -1.995138 |
| 10            | 1             | 0           | -1.179976               | 2.953236  | -2.093156 |
| 11            | 1             | 0           | -2.255609               | 4.241983  | -0.258255 |
| 12            | 6             | 0           | -2.134125               | -1.126235 | 0.014462  |
| 13            | 8             | 0           | -2.944068               | -1.709001 | 0.702632  |
| 14            | 6             | 0           | -1.118057               | -1.927138 | -0.806506 |
| 15            | 1             | 0           | -1.994880               | -3.859602 | -0.494536 |
| 16            | 8             | 0           | 0.167696                | -1.290977 | -0.826536 |
| 17            | 6             | 0           | 0.704246                | -0.924656 | 0.339271  |
| 18            | 8             | 0           | 0.144638                | -1.098368 | 1.399325  |
| 19            | 6             | 0           | 2.032899                | -0.272742 | 0.191049  |
| 20            | 6             | 0           | 2.694366                | 0.136945  | 1.354233  |
| 21            | 6             | 0           | 2.615035                | -0.062212 | -1.064732 |
| 22            | 6             | 0           | 3.937884                | 0.755070  | 1.262434  |
| 23            | 1             | 0           | 2.225139                | -0.033967 | 2.324163  |
| 24            | 6             | 0           | 3.859243                | 0.557888  | -1.150292 |
| 25            | 1             | 0           | 2.094782                | -0.382216 | -1.967497 |
| 26            | 6             | 0           | 4.519288                | 0.965585  | 0.010257  |
| 27            | 1             | 0           | 4.456362                | 1.073669  | 2.167662  |
| 28            | 1             | 0           | 4.316346                | 0.723210  | -2.126880 |
| 29            | 1             | 0           | 5.494395                | 1.450202  | -0.062535 |
| 30            | 1             | 0           | -1.452407               | -1.870301 | -1.853529 |

Zero-point correction= 0.265010 (Hartree/Particle)

Thermal correction to Energy= 0.281091

Thermal correction to Enthalpy= 0.282035

Thermal correction to Gibbs Free Energy= 0.218970

Sum of electronic and zero-point Energies= -842.601794

Sum of electronic and thermal Energies= -842.585713

Sum of electronic and thermal Enthalpies= -842.584769

Sum of electronic and thermal Free Energies= -842.647834

**OH\_radical\_H2O**, Standard orientation:

| Center<br>Number | Atomic<br>Number | Atomic<br>Type | Coordinates (Angstroms) |           |           |
|------------------|------------------|----------------|-------------------------|-----------|-----------|
|                  |                  |                | X                       | Y         | Z         |
| 1                | 1                | 0              | -0.456857               | -0.170539 | 0.007052  |
| 2                | 8                | 0              | -1.424601               | -0.095257 | -0.018258 |
| 3                | 1                | 0              | -1.567166               | 0.847908  | 0.132849  |
| 4                | 8                | 0              | 1.486171                | -0.098205 | 0.016871  |
| 5                | 1                | 0              | 1.531460                | 0.870324  | -0.128803 |

Zero-point correction= 0.032580 (Hartree/Particle)

Thermal correction to Energy= 0.037921

Thermal correction to Enthalpy= 0.038865

Thermal correction to Gibbs Free Energy= 0.006091

Sum of electronic and zero-point Energies= -151.951522

Sum of electronic and thermal Energies= -151.946181

Sum of electronic and thermal Enthalpies= -151.945237

Sum of electronic and thermal Free Energies= -151.978012

**OH\_anion\_H2O**, Standard orientation:

| Center<br>Number | Atomic<br>Number | Atomic<br>Type | Coordinates (Angstroms) |           |           |
|------------------|------------------|----------------|-------------------------|-----------|-----------|
|                  |                  |                | X                       | Y         | Z         |
| 1                | 1                | 0              | -0.115645               | -0.118459 | 0.012077  |
| 2                | 8                | 0              | -1.214742               | -0.078865 | 0.068666  |
| 3                | 1                | 0              | -1.402224               | 0.684168  | -0.490767 |
| 4                | 8                | 0              | 1.232769                | -0.079565 | -0.068811 |
| 5                | 1                | 0              | 1.373658                | 0.701728  | 0.479846  |

Zero-point correction= 0.031760 (Hartree/Particle)

Thermal correction to Energy= 0.035780

Thermal correction to Enthalpy= 0.036724

Thermal correction to Gibbs Free Energy= 0.008021

Sum of electronic and zero-point Energies= -152.136076

Sum of electronic and thermal Energies= -152.132056

Sum of electronic and thermal Enthalpies= -152.131112

Sum of electronic and thermal Free Energies= -152.159815

**H2O**, Standard orientation:

| Center<br>Number | Atomic<br>Number | Atomic<br>Type | Coordinates (Angstroms) |           |          |
|------------------|------------------|----------------|-------------------------|-----------|----------|
|                  |                  |                | X                       | Y         | Z        |
| 1                | 1                | 0              | 0.753364                | -0.483677 | 0.000000 |
| 2                | 8                | 0              | 0.000000                | 0.120916  | 0.000000 |
| 3                | 1                | 0              | -0.753364               | -0.483653 | 0.000000 |

Zero-point correction= 0.021290 (Hartree/Particle)  
 Thermal correction to Energy= 0.024126  
 Thermal correction to Enthalpy= 0.025070  
 Thermal correction to Gibbs Free Energy= 0.002972  
 Sum of electronic and zero-point Energies= -76.314093  
 Sum of electronic and thermal Energies= -76.311257  
 Sum of electronic and thermal Enthalpies= -76.310313  
 Sum of electronic and thermal Free Energies= -76.332411

**H**, Standard orientation:

| Center<br>Number | Atomic<br>Number | Atomic<br>Type | Coordinates (Angstroms) |          |          |
|------------------|------------------|----------------|-------------------------|----------|----------|
|                  |                  |                | X                       | Y        | Z        |
| 1                | 1                | 0              | 0.000000                | 0.000000 | 0.000000 |

Zero-point correction= 0.000000 (Hartree/Particle)  
 Thermal correction to Energy= 0.001416  
 Thermal correction to Enthalpy= 0.002360  
 Thermal correction to Gibbs Free Energy= -0.010654  
 Sum of electronic and zero-point Energies= -0.496666  
 Sum of electronic and thermal Energies= -0.495249  
 Sum of electronic and thermal Enthalpies= -0.494305  
 Sum of electronic and thermal Free Energies= -0.507320

**H<sub>2</sub>**, Standard orientation:

| Center<br>Number | Atomic<br>Number | Atomic<br>Type | Coordinates (Angstroms) |          |           |
|------------------|------------------|----------------|-------------------------|----------|-----------|
|                  |                  |                | X                       | Y        | Z         |
| 1                | 1                | 0              | 0.000000                | 0.000000 | 0.376835  |
| 2                | 1                | 0              | 0.000000                | 0.000000 | -0.376835 |

Zero-point correction= 0.010244 (Hartree/Particle)  
 Thermal correction to Energy= 0.012604  
 Thermal correction to Enthalpy= 0.013548  
 Thermal correction to Gibbs Free Energy= -0.001271  
 Sum of electronic and zero-point Energies= -1.153268  
 Sum of electronic and thermal Energies= -1.150907  
 Sum of electronic and thermal Enthalpies= -1.149963  
 Sum of electronic and thermal Free Energies= -1.164782

**Cl radical H<sub>2</sub>O**, Standard orientation:

| Center<br>Number | Atomic<br>Number | Atomic<br>Type | Coordinates (Angstroms) |           |           |
|------------------|------------------|----------------|-------------------------|-----------|-----------|
|                  |                  |                | X                       | Y         | Z         |
| 1                | 17               | 0              | -1.275059               | 0.004703  | -0.000004 |
| 2                | 1                | 0              | 1.296455                | -0.214622 | 0.000224  |



|   |   |   |          |           |           |
|---|---|---|----------|-----------|-----------|
| 3 | 8 | 0 | 2.254618 | -0.091964 | -0.000025 |
| 4 | 1 | 0 | 2.342604 | 0.870378  | 0.000034  |

-----

Zero-point correction= 0.023422 (Hartree/Particle)  
 Thermal correction to Energy= 0.027696  
 Thermal correction to Enthalpy= 0.028640  
 Thermal correction to Gibbs Free Energy= -0.003139  
 Sum of electronic and zero-point Energies= -536.290007  
 Sum of electronic and thermal Energies= -536.285733  
 Sum of electronic and thermal Enthalpies= -536.284789  
 Sum of electronic and thermal Free Energies= -536.316568

**Cl H<sub>2</sub>O**, Standard orientation:

-----

| Center<br>Number | Atomic<br>Number | Atomic<br>Type | Coordinates (Angstroms) |           |          |
|------------------|------------------|----------------|-------------------------|-----------|----------|
|                  |                  |                | X                       | Y         | Z        |
| 1                | 17               | 0              | -1.085588               | 0.005320  | 0.000000 |
| 2                | 1                | 0              | 0.935006                | -0.136464 | 0.000000 |
| 3                | 8                | 0              | 1.928785                | -0.100678 | 0.000000 |
| 4                | 1                | 0              | 2.089715                | 0.851440  | 0.000000 |

-----

Zero-point correction= 0.022866 (Hartree/Particle)  
 Thermal correction to Energy= 0.026690  
 Thermal correction to Enthalpy= 0.027634  
 Thermal correction to Gibbs Free Energy= -0.001793  
 Sum of electronic and zero-point Energies= -536.510141  
 Sum of electronic and thermal Energies= -536.506317  
 Sum of electronic and thermal Enthalpies= -536.505373  
 Sum of electronic and thermal Free Energies= -536.534800

**Br radical H<sub>2</sub>O**, Standard orientation:

-----

| Center<br>Number | Atomic<br>Number | Atomic<br>Type | Coordinates (Angstroms) |           |          |
|------------------|------------------|----------------|-------------------------|-----------|----------|
|                  |                  |                | X                       | Y         | Z        |
| 1                | 1                | 0              | -0.457141               | 2.099482  | 0.000000 |
| 2                | 8                | 0              | 0.026562                | 2.934687  | 0.000000 |
| 3                | 1                | 0              | -0.685037               | 3.588904  | 0.000000 |
| 4                | 35               | 0              | 0.026562                | -0.833311 | 0.000000 |

-----

Zero-point correction= 0.022545 (Hartree/Particle)  
 Thermal correction to Energy= 0.027287  
 Thermal correction to Enthalpy= 0.028231  
 Thermal correction to Gibbs Free Energy= -0.006056  
 Sum of electronic and zero-point Energies= -2650.156221  
 Sum of electronic and thermal Energies= -2650.151478  
 Sum of electronic and thermal Enthalpies= -2650.150534  
 Sum of electronic and thermal Free Energies= -2650.184822

**Br H<sub>2</sub>O**, Standard orientation:

---

| Center<br>Number | Atomic<br>Number | Atomic<br>Type | Coordinates (Angstroms) |           |           |
|------------------|------------------|----------------|-------------------------|-----------|-----------|
|                  |                  |                | X                       | Y         | Z         |
| 1                | 1                | 0              | 1.523403                | -0.178407 | 0.000036  |
| 2                | 8                | 0              | 2.509309                | -0.096174 | -0.000004 |
| 3                | 1                | 0              | 2.618981                | 0.863277  | 0.000004  |
| 4                | 35               | 0              | -0.691910               | 0.002415  | 0.000000  |

---

Zero-point correction= 0.023125 (Hartree/Particle)

Thermal correction to Energy= 0.026993

Thermal correction to Enthalpy= 0.027937

Thermal correction to Gibbs Free Energy= -0.002794

Sum of electronic and zero-point Energies= -2650.361806

Sum of electronic and thermal Energies= -2650.357938

Sum of electronic and thermal Enthalpies= -2650.356994

Sum of electronic and thermal Free Energies= -2650.387725
